# Supplementary material for: N-Sulfonyl α-imino ester-derived chiral oxaziridines: catalytic asymmetric synthesis and application as a modular chiral organic oxidant
Source: Royal Society of Chemistry journal article supplement (doi:10.1039/c7cc02502e), 2017-01-01

Electronic Supplementary Information for

***N*-Sulfonyl  $\alpha$ -Imino Ester-Derived Chiral Oxaziridines: Catalytic Asymmetric Synthesis and Application as a Modular Chiral Organic Oxidant**

Naoya Tanaka,<sup>†</sup> Ryosuke Tsutsumi,<sup>†</sup> Daisuke Uraguchi,<sup>†</sup> and Takashi Ooi<sup>\*,†,‡</sup>

<sup>†</sup>*Institute of Transformative Bio-Molecules (WPI-ITbM) and Department of Molecular and Macromolecular Chemistry, Graduate School of Engineering, Nagoya University, Nagoya 464-8601, Japan.*

<sup>‡</sup>*CREST, Japan Science and Technology Agency (JST), Nagoya University, Nagoya 464-8601, Japan*

*tooi@chembio.nagoya-u.ac.jp*

**General Information:** Infrared spectra were recorded on a SHIMADZU IRAffinity-1 spectrometer. <sup>1</sup>H NMR spectra were recorded on a JEOL JNM-ECS400 (400 MHz) spectrometer or JEOL JNM-ECA600 (600 MHz). Chemical shifts are reported in ppm from tetramethylsilane (0.00 ppm) resonance as the internal standard. Data are reported as follows: chemical shift, integration, multiplicity (s = singlet, d = doublet, t = triplet, q = quartet, quin = quintet, m = multiplet, br = broad), and coupling constants (Hz). <sup>13</sup>C NMR spectra were recorded on a JEOL JNM-ECS400 (101 MHz) spectrometer or JEOL JNM-ECA600 (151 MHz) spectrometer with complete proton decoupling. Chemical shifts are reported in ppm from the solvent resonance (CDCl<sub>3</sub>: 77.16 ppm). <sup>19</sup>F NMR spectra were recorded on a JEOL JNM-ECS400 (376 MHz) spectrometer. Chemical shifts are reported in ppm from benzotrifluoride (−64.0 ppm) resonance as the external standard. <sup>31</sup>P NMR spectra were recorded on a JEOL JNM-ECS400 (162 MHz) spectrometer with complete proton decoupling. Chemical shifts are reported in ppm from H<sub>3</sub>PO<sub>4</sub> (0.0 ppm) resonance as the external standard. Optical rotations were measured on a HORIBA SEPA-500 polarimeter. The high resolution mass spectra were conducted on Thermo Fisher Scientific Exactive (ESI). Analytical thin layer chromatography (TLC) was performed on Merck precoated TLC plates (silica gel 60 GF<sub>254</sub>, 0.25 mm). Flash column chromatography was performed on PSQ60AB (spherical, av. 55  $\mu$ m; Fuji Silysia Chemical Ltd.) or silica gel 60 (spherical, 40-50  $\mu$ m; Kanto Chemical Co., Inc.). Enantiomeric excesses were determined by HPLC analysis using chiral columns [ $\phi$  4.6 mm x 250 mm, DAICEL CHIRALCEL OD-3 (OD-3), CHIRALPAK AD-3 (AD-3), CHIRALPAK AY-3 (AY-3), CHIRALCEL OX-3 (OX-3), and CHIRALPAK IA (IA) with hexane (H), 2-propanol (IPA), and ethanol (EtOH) as eluent].

Diethyl ether (Et<sub>2</sub>O), toluene, dichloroethane ((CH<sub>2</sub>Cl)<sub>2</sub>), and dichloromethane (CH<sub>2</sub>Cl<sub>2</sub>) were supplied from Kanto Chemical Co., Inc. as “Dehydrated” and further purified by passing through neutral alumina under nitrogen atmosphere. Aminophosphonium chlorides **1**·HCl<sup>1</sup> and iminophosphoranes **1**<sup>1</sup> were prepared by following the literature procedure. Other simple chemicals were purchased and used as such.

(1) D. Uraguchi, K. Yoshioka, Y. Ueki and T. Ooi, *J. Am. Chem. Soc.*, 2012, **134**, 19370.

## Experimental Section:

### Characterization of Catalysts:

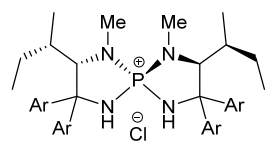

**Tetraaminophosphonium Chloride 1e·HCl (Ar = 3-FC<sub>6</sub>H<sub>4</sub>):** The synthesis was performed by following the literature procedure.<sup>1</sup> <sup>1</sup>H NMR (600 MHz, CDCl<sub>3</sub>)  $\delta$  7.95 (2H, d,  $J_{P-H}$  = 15.0 Hz), 7.90 (2H, br), 7.45-7.36 (6H, m), 7.31 (2H, d,  $J_{F-H}$  = 10.2 Hz), 7.07 (2H, br) 7.03 (2H, t,  $J_{F-H}$  = 8.4 Hz,  $J_{H-H}$  = 8.4 Hz), 6.94 (2H, t,  $J_{F-H}$  = 8.4 Hz,  $J_{H-H}$  = 8.4 Hz), 3.76 (2H, dd,  $J_{P-H}$  = 21.0 Hz,  $J_{H-H}$  = 4.8 Hz), 1.94-1.86 (2H, m), 1.89 (6H, d,  $J_{P-H}$  = 10.2 Hz), 1.84-1.76 (2H, m), 0.97-0.86 (2H, m), 0.86 (6H, t,  $J$  = 7.2 Hz), 0.63 (6H, d,  $J$  = 6.6 Hz); <sup>13</sup>C NMR (151 MHz, CDCl<sub>3</sub>)  $\delta$  163.2 (d,  $J_{F-C}$  = 248.7 Hz), 162.6 (d,  $J_{F-C}$  = 245.7 Hz), 150.2 (d,  $J_{F-C}$  = 5.9 Hz), 141.0 (d,  $J_{F-C}$  = 7.2 Hz), 130.8 (d,  $J_{F-C}$  = 8.8 Hz), 130.5 (d,  $J_{F-C}$  = 8.8 Hz), 123.5, 122.5, 115.4 (d,  $J_{F-C}$  = 23.1 Hz), 115.2 (d,  $J_{F-C}$  = 5.7 Hz), 115.1 (d,  $J_{F-C}$  = 7.2 Hz), 114.3 (d,  $J_{F-C}$  = 24.6 Hz), 73.9 (d,  $J_{P-C}$  = 11.5 Hz), 70.7 (d,  $J_{P-C}$  = 10.1 Hz), 36.2, 32.4 (d,  $J_{P-C}$  = 5.7 Hz), 25.2, 19.0, 12.1; <sup>19</sup>F NMR (376 MHz, CDCl<sub>3</sub>)  $\delta$  -100.9, -110.6; <sup>31</sup>P NMR (162 MHz, CDCl<sub>3</sub>)  $\delta$  38.7; IR (film) 3055, 2967, 2716, 1612, 1589, 1489, 1437, 1339, 1238, 1186, 1022, 1001, 966 cm<sup>-1</sup>; HRMS (ESI) Calcd for C<sub>38</sub>H<sub>44</sub>N<sub>4</sub>F<sub>4</sub>P<sup>+</sup> ([M-Cl]<sup>+</sup>) 663.3234. Found 663.3211.; [ $\alpha$ ]<sub>D</sub><sup>24</sup> -212.1 ( $c$  = 1.18, CHCl<sub>3</sub>).

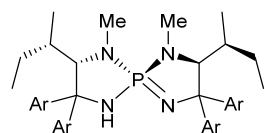

**Triaminoiminophosphorane 1e (Ar = 3-FC<sub>6</sub>H<sub>4</sub>):** The synthesis was performed by following the literature procedure.<sup>1</sup> <sup>1</sup>H NMR (600 MHz, CDCl<sub>3</sub>)  $\delta$  7.43-7.14 (12H, m), 6.94-6.82 (4H, m), 3.73 (2H, dd,  $J_{P-H}$  = 18.6 Hz,  $J_{H-H}$  = 2.7 Hz), 1.90 (2H, quin-dd,  $J$  = 7.2, 6.6, 2.7 Hz), 1.85 (6H, d,  $J$  = 9.0 Hz), 1.34 (2H, br), 0.92 (2H, d-quin,  $J$  = 16.8, 7.2 Hz), 0.75 (6H, d,  $J$  = 7.2 Hz), 0.68 (6H, t,  $J$  = 7.2 Hz); <sup>13</sup>C NMR (151 MHz, CDCl<sub>3</sub>)  $\delta$  163.0 (d,  $J_{F-C}$  = 244.3 Hz), 162.7 (d,  $J_{F-C}$  = 245.8 Hz), 154.5, 147.4, 129.4 (d,  $J_{F-C}$  = 7.2 Hz), 129.3 (d,  $J_{F-C}$  = 7.2 Hz), 123.6, 122.3, 115.1 (d,  $J_{F-C}$  = 23.1 Hz), 114.3 (d,  $J_{F-C}$  = 21.7 Hz), 113.5, (d,  $J_{F-C}$  = 18.9 Hz), 73.8, 71.1, 37.6, 32.3 (d,  $J_{P-C}$  = 4.2 Hz), 24.7, 19.5, 12.4, one carbon atom was not found probably due to overlapping; <sup>19</sup>F NMR (376 MHz, CDCl<sub>3</sub>)  $\delta$  -113.1; <sup>31</sup>P NMR (162 MHz, CDCl<sub>3</sub>)  $\delta$  45.0; IR (film) 3451, 3405, 3067, 2965, 2876, 1611, 1587, 1485, 1439, 1327, 1230, 1194, 1136, 1107, 1001, 956 cm<sup>-1</sup>; HRMS (ESI) Calcd for C<sub>38</sub>H<sub>44</sub>N<sub>4</sub>F<sub>4</sub>P<sup>+</sup> ([M+H]<sup>+</sup>) 663.3234. Found 663.3210.; [ $\alpha$ ]<sub>D</sub><sup>24</sup> -251.4 ( $c$  = 1.00, CHCl<sub>3</sub>).

### Representative Procedure for Synthesis of *N*-Sulfonyl $\alpha$ -Imino Esters:

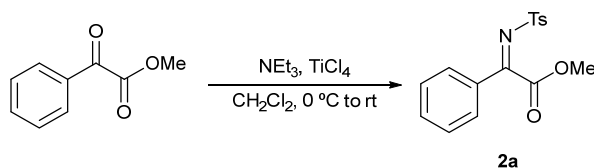

*N*-Sulfonyl  $\alpha$ -imino esters were prepared by following the literature procedure with slight modification.<sup>2</sup> A solution of methyl benzoyl formate (1.28 g, 7.8 mmol), *p*-toluenesulfonamide (1.60 g, 9.4 mmol), and triethylamine (2.17 mL, 15.6 mmol) in CH<sub>2</sub>Cl<sub>2</sub> (40 mL) was cooled to 0 °C. To the solution was added TiCl<sub>4</sub> (0.86 mL, 7.8 mmol) dropwise under Ar atmosphere. The solution was allowed to warm to ambient temperature and stirred until the complete consumption of methyl benzoyl formate. The reaction mixture was diluted with a mixed solvent of H/ethyl acetate (EA) (4:1, 10 mL) and filtered through a short plug of silica gel (H/EA = 4:1 as eluent). After removal of solvent under reduced pressure, the crude material was purified by silica gel column chromatography (H/EA = 20:1  $\rightarrow$  4:1) and subsequent trituration with H/Et<sub>2</sub>O

(2) J. S. Dickstein, M. W. Fennie, A. L. Norman, B. J. Paulose and M. C. Kozlowski, *J. Am. Chem. Soc.*, 2008, **130**, 15794. (3) M. Hojo, M. Hojo, Y. Inoue and S. Tanimoto, *Bull. Chem. Soc. Jpn.*, 1990, **63**, 2588.

(10:1) afforded *N*-sulfonyl  $\alpha$ -imino ester **2a** as a white solid (1.78 g, 5.6 mmol, 72%). **2a**<sup>3</sup>: white solid; <sup>1</sup>H NMR (400 MHz, CDCl<sub>3</sub>)  $\delta$  7.93 (2H, d,  $J$  = 7.5 Hz), 7.83 (2H, d,  $J$  = 7.5 Hz), 7.60 (1H, t,  $J$  = 7.5 Hz), 7.44 (2H, t,  $J$  = 7.5 Hz), 7.35 (2H, d,  $J$  = 7.5 Hz), 4.09 (3H, s), 2.44 (3H, s); <sup>13</sup>C NMR (101 MHz, CDCl<sub>3</sub>)  $\delta$  167.1, 165.4, 145.0, 135.6, 135.0, 131.4, 130.0, 129.9, 129.2, 128.3, 53.6, 21.8; IR (film) 3065, 2955, 1742, 1605, 1589, 1570, 1449, 1329, 1298, 1215, 1159, 1088, 1007 cm<sup>-1</sup>; HRMS (ESI) Calcd for C<sub>16</sub>H<sub>16</sub>O<sub>4</sub>NS<sup>+</sup> ([M+H]<sup>+</sup>) 318.0800. Found 318.0794.

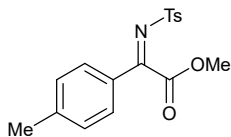

**2b**: colorless sticky oil; <sup>1</sup>H NMR (600 MHz, CDCl<sub>3</sub>)  $\delta$  7.92 (2H, d,  $J$  = 8.2 Hz), 7.72 (2H, d,  $J$  = 8.2 Hz), 7.34 (2H, d,  $J$  = 8.2 Hz), 7.24 (2H, d,  $J$  = 8.2 Hz), 4.08 (3H, s), 2.43 (3H, s), 2.41 (3H, s); <sup>13</sup>C NMR (151 MHz, CDCl<sub>3</sub>)  $\delta$  167.1, 165.6, 146.6, 144.8, 135.9, 130.2, 130.0, 129.9, 128.8, 128.2, 53.5, 22.0, 21.8; IR (film) 2955, 1744, 1587, 1557, 1435, 1323, 1304, 1221, 1159, 1088, 1009 cm<sup>-1</sup>; HRMS (ESI) Calcd for C<sub>17</sub>H<sub>17</sub>O<sub>4</sub>NNaS<sup>+</sup> ([M+Na]<sup>+</sup>) 354.0776. Found 354.0772.

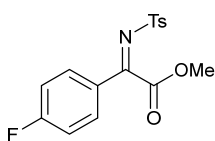

**2c**: colorless sticky oil; <sup>1</sup>H NMR (600 MHz, CDCl<sub>3</sub>)  $\delta$  7.92 (2H, d,  $J$  = 8.4 Hz), 7.86 (2H, dd,  $J_{\text{H-H}} = 9.0$  Hz,  $J_{\text{F-H}} = 4.8$  Hz), 7.35 (2H, d,  $J$  = 8.4 Hz), 7.13 (2H, dd,  $J_{\text{F-H}} = 9.0$  Hz,  $J_{\text{H-H}} = 9.0$  Hz), 4.09 (3H, s), 2.44 (3H, s); <sup>13</sup>C NMR (151 MHz, CDCl<sub>3</sub>)  $\delta$  166.9 (d,  $J_{\text{F-C}} = 258.8$  Hz), 165.7, 165.2, 145.1, 135.5, 132.7 (d,  $J_{\text{F-C}} = 10.1$  Hz), 129.9, 128.3, 127.7 (d,  $J_{\text{F-C}} = 2.9$  Hz), 116.7 (d,  $J_{\text{F-C}} = 23.3$  Hz), 53.7, 21.8; <sup>19</sup>F NMR (376 MHz, CDCl<sub>3</sub>)  $\delta$  -100.9; IR (film) 2957, 1742, 1595, 1574, 1508, 1449, 1327, 1306, 1215, 1155, 1088, 1008 cm<sup>-1</sup>; HRMS (ESI) Calcd for C<sub>16</sub>H<sub>15</sub>O<sub>4</sub>NFS<sup>+</sup> ([M+H]<sup>+</sup>) 336.0706. Found 336.0700.

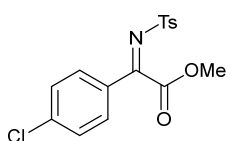

**2d**: white solid; <sup>1</sup>H NMR (400 MHz, CDCl<sub>3</sub>)  $\delta$  7.92 (2H, d,  $J$  = 8.2 Hz), 7.77 (2H, dt,  $J$  = 9.2, 2.2 Hz), 7.42 (2H, dt,  $J$  = 9.2, 2.2 Hz), 7.35 (2H, d,  $J$  = 8.2 Hz), 4.09 (3H, s), 2.44 (3H, s); <sup>13</sup>C NMR (101 MHz, CDCl<sub>3</sub>)  $\delta$  165.9, 165.1, 145.2, 141.7, 135.4, 131.2, 130.0, 129.8, 129.6, 128.4, 53.8, 21.9; IR (film) 2955, 1742, 1607, 1584, 1557, 1435, 1404, 1331, 1306, 1215, 1161, 1088, 1005 cm<sup>-1</sup>; HRMS (ESI) Calcd for C<sub>16</sub>H<sub>15</sub>O<sub>4</sub>N<sup>35</sup>ClS<sup>+</sup> ([M+H]<sup>+</sup>) 352.0410. Found 352.0406.

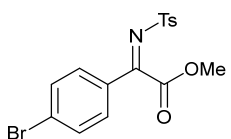

**2e**: white solid; <sup>1</sup>H NMR (400 MHz, CDCl<sub>3</sub>)  $\delta$  7.92 (2H, d,  $J$  = 8.2 Hz), 7.68 (2H, dt,  $J$  = 9.2, 2.1 Hz), 7.58 (2H, dt,  $J$  = 9.2, 2.1 Hz), 7.35 (2H, d,  $J$  = 8.2 Hz), 4.09 (3H, s), 2.44 (3H, s); <sup>13</sup>C NMR (101 MHz, CDCl<sub>3</sub>)  $\delta$  166.1, 165.0, 145.2, 135.3, 132.6, 131.2, 130.6, 130.3, 130.0, 128.3, 53.8, 21.8; IR (film) 2955, 1742, 1605, 1578, 1553, 1435, 1398, 1331, 1312, 1298, 1217, 1161, 1088, 1072, 1003 cm<sup>-1</sup>; HRMS (ESI) Calcd for C<sub>16</sub>H<sub>15</sub>O<sub>4</sub>N<sup>79</sup>BrS<sup>+</sup> ([M+H]<sup>+</sup>) 395.9905. Found 395.9897.

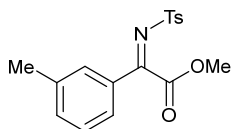

**2f**: white solid; <sup>1</sup>H NMR (600 MHz, CDCl<sub>3</sub>)  $\delta$  7.93 (2H, d,  $J$  = 8.4 Hz), 7.66 (1H, s), 7.61 (1H, d,  $J$  = 7.6 Hz), 7.41 (1H, d,  $J$  = 7.6 Hz), 7.35 (2H, d,  $J$  = 8.4 Hz), 7.33 (1H, t,  $J$  = 7.6 Hz), 4.09 (3H, s), 2.44 (3H, s), 2.37 (3H, s); <sup>13</sup>C NMR (151 MHz, CDCl<sub>3</sub>)  $\delta$  167.4, 165.5, 145.0, 139.2, 135.9, 135.7, 131.3, 130.3, 129.9, 129.1, 128.3, 127.5, 53.6, 21.8, 21.4; IR (film) 2955, 1742, 1572, 1433, 1329, 1304, 1238, 1161, 1088, 1041 cm<sup>-1</sup>; HRMS (ESI) Calcd for C<sub>17</sub>H<sub>18</sub>O<sub>4</sub>NS<sup>+</sup> ([M+H]<sup>+</sup>) 332.0951. Found 332.0946.

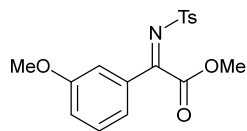

**2g:** orange oil;  $^1\text{H NMR}$  (400 MHz,  $\text{CDCl}_3$ )  $\delta$  7.93 (2H, d,  $J = 7.9$  Hz), 7.40 (1H, t,  $J = 1.4$  Hz), 7.38-7.31 (4H, m), 7.17-7.10 (1H, m), 4.08 (3H, s), 3.81 (3H, s), 2.44 (3H, s);  $^{13}\text{C NMR}$  (101 MHz,  $\text{CDCl}_3$ )  $\delta$  167.2, 165.4, 160.1, 145.1, 135.6, 132.7, 130.1, 129.9, 128.3, 123.2, 121.7, 113.6, 55.7, 53.6, 21.8; IR (film) 2955, 2837, 1742, 1605, 1570, 1487, 1450, 1431, 1327, 1250, 1202, 1159, 1088, 1016  $\text{cm}^{-1}$ ; HRMS (ESI) Calcd for  $\text{C}_{17}\text{H}_{18}\text{O}_5\text{N}^+$  ( $[\text{M}+\text{H}]^+$ ) 348.0906. Found 348.0897.

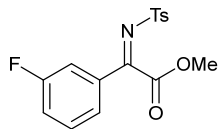

**2h:** white solid;  $^1\text{H NMR}$  (400 MHz,  $\text{CDCl}_3$ )  $\delta$  7.92 (2H, d,  $J = 8.2$  Hz), 7.58 (1H, dd,  $J = 8.0, 2.3$  Hz), 7.57 (1H, dd,  $J = 8.0, 1.5$  Hz), 7.43 (1H, td,  $J_{\text{H-H}} = 8.0$  Hz,  $J_{\text{F-H}} = 5.2$  Hz), 7.36 (2H, d,  $J = 8.2$  Hz), 7.30 (1H, dddd,  $J_{\text{F-H}} = 8.0$  Hz,  $J_{\text{H-H}} = 8.0, 2.3, 1.5$  Hz), 4.10 (3H, s), 2.45 (3H, s);  $^{13}\text{C NMR}$  (151 MHz,  $\text{CDCl}_3$ )  $\delta$  165.8, 164.9, 162.8 (d,  $J_{\text{F-C}} = 250.1$  Hz), 145.2, 135.3, 133.5 (d,  $J_{\text{F-C}} = 7.3$  Hz), 130.8 (d,  $J_{\text{F-C}} = 7.3$  Hz), 129.9, 128.3, 126.0, 122.0 (d,  $J_{\text{F-C}} = 21.7$  Hz), 116.2 (d,  $J_{\text{F-C}} = 23.1$  Hz), 53.7, 21.8;  $^{19}\text{F NMR}$  (376 MHz,  $\text{CDCl}_3$ )  $\delta$  -110.5; IR (film) 3073, 2957, 1742, 1616, 1597, 1580, 1485, 1445, 1333, 1308, 1242, 1161, 1090, 1018, 953  $\text{cm}^{-1}$ ; HRMS (ESI) Calcd for  $\text{C}_{16}\text{H}_{15}\text{O}_4\text{NF}^+$  ( $[\text{M}+\text{H}]^+$ ) 336.0700. Found 336.0703.

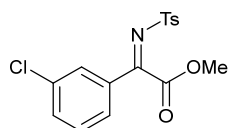

**2i:** white solid;  $^1\text{H NMR}$  (600 MHz,  $\text{CDCl}_3$ )  $\delta$  7.92 (2H, d,  $J = 8.4$  Hz), 7.84 (1H, s), 7.67 (1H, d,  $J = 7.8$  Hz), 7.56 (1H, d,  $J = 7.8$  Hz), 7.40 (1H, t,  $J = 7.8$  Hz), 7.36 (2H, d,  $J = 8.4$  Hz), 4.10 (3H, s), 2.45 (3H, s);  $^{13}\text{C NMR}$  (151 MHz,  $\text{CDCl}_3$ )  $\delta$  165.7, 164.9, 145.3, 135.6, 135.3, 134.8, 133.1, 130.4, 130.0, 129.5, 128.4, 128.2, 53.8, 21.9; IR (film) 2955, 1744, 1607, 1562, 1427, 1333, 1302, 1211, 1161, 1090, 1018  $\text{cm}^{-1}$ ; HRMS (ESI) Calcd for  $\text{C}_{16}\text{H}_{15}\text{O}_4\text{N}^{35}\text{Cl}^+$  ( $[\text{M}+\text{H}]^+$ ) 352.0410. Found 352.0409.

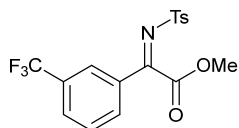

**2j:** colorless oil;  $^1\text{H NMR}$  (600 MHz,  $\text{CDCl}_3$ )  $\delta$  8.10 (1H, s), 7.98 (1H, d,  $J = 7.9$  Hz), 7.94 (2H, d,  $J = 8.4$  Hz), 7.85 (1H, d,  $J = 7.9$  Hz), 7.60 (1H, t,  $J = 7.9$  Hz), 7.37 (2H, d,  $J = 8.4$  Hz), 4.11 (3H, s), 2.45 (3H, s);  $^{13}\text{C NMR}$  (151 MHz,  $\text{CDCl}_3$ )  $\delta$  165.6, 164.8, 145.5, 135.1, 133.1, 132.3, 132.0 (q,  $J_{\text{F-C}} = 33.2$  Hz), 131.1, 130.1, 129.9, 128.5, 126.4, 123.3 (q,  $J_{\text{F-C}} = 274.9$  Hz), 53.9, 21.9;  $^{19}\text{F NMR}$  (376 MHz,  $\text{CDCl}_3$ )  $\delta$  -62.9; IR (film) 2957, 1744, 1595, 1435, 1333, 1285, 1209, 1163, 1130, 1090, 1018  $\text{cm}^{-1}$ ; HRMS (ESI) Calcd for  $\text{C}_{17}\text{H}_{15}\text{O}_4\text{NF}_3^+$  ( $[\text{M}+\text{H}]^+$ ) 386.0674. Found 386.0667.

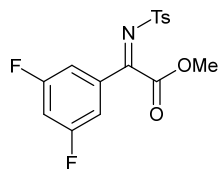

**2k:** white solid;  $^1\text{H NMR}$  (600 MHz,  $\text{CDCl}_3$ )  $\delta$  7.92 (2H, d,  $J = 8.4$  Hz), 7.37 (2H, d,  $J = 8.4$  Hz), 7.35 (2H, dd,  $J_{\text{F-H}} = 7.8$  Hz,  $J_{\text{H-H}} = 1.8$  Hz), 7.04 (1H, tt,  $J_{\text{F-H}} = 7.8$  Hz,  $J_{\text{H-H}} = 1.8$  Hz), 4.10 (3H, s), 2.46 (3H, s);  $^{13}\text{C NMR}$  (151 MHz,  $\text{CDCl}_3$ )  $\delta$  164.6, 164.4, 163.1 (dd,  $J_{\text{F-C}} = 252.3, 12.2$  Hz), 145.5, 135.0, 134.5 (t,  $J_{\text{F-C}} = 8.5$  Hz), 130.1, 128.5, 112.8 (dd,  $J_{\text{F-C}} = 21.7, 5.8$  Hz), 110.1 (t,  $J_{\text{F-C}} = 25.3$  Hz), 54.0, 21.9;  $^{19}\text{F NMR}$  (376 MHz,  $\text{CDCl}_3$ )  $\delta$  -107.0; IR (film) 3086, 2957, 1742, 1624, 1589, 1437, 1335, 1269, 1163, 1126, 1090, 993  $\text{cm}^{-1}$ ; HRMS (ESI) Calcd for  $\text{C}_{16}\text{H}_{14}\text{O}_4\text{NF}_2\text{S}^+$  ( $[\text{M}+\text{H}]^+$ ) 354.0612. Found 354.0604.

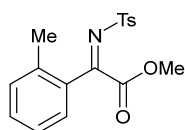

**2l:** colorless oil;  $^1\text{H NMR}$  (600 MHz,  $\text{CDCl}_3$ )  $\delta$  7.92 (2H, d,  $J = 8.4$  Hz), 7.52 (1H, d,  $J = 7.8$  Hz), 7.41 (1H, t,  $J = 7.8$  Hz), 7.35 (2H, d,  $J = 8.4$  Hz), 7.26 (1H, t,  $J = 7.8$  Hz), 7.25 (1H, d,  $J = 7.8$  Hz), 4.05 (3H, s), 2.45 (3H, s), 2.44 (3H, s);  $^{13}\text{C NMR}$  (151 MHz,  $\text{CDCl}_3$ )  $\delta$  168.5, 165.4, 144.9, 141.1, 136.1, 133.2, 132.8, 131.4, 130.5, 129.9, 129.7, 128.2, 126.4, 53.6, 22.3, 21.8; IR (film) 2955, 1742, 1597, 1562, 1456, 1329, 1308, 1211, 1159, 1088, 1005  $\text{cm}^{-1}$ ; HRMS (ESI) Calcd for  $\text{C}_{17}\text{H}_{17}\text{O}_4\text{NNa}^+$  ( $[\text{M}+\text{Na}]^+$ ) 354.0776. Found 354.0765.

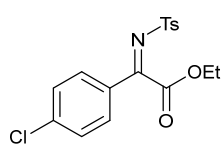

**2m**: colorless sticky oil;  $^1\text{H}$  NMR (600 MHz,  $\text{CDCl}_3$ )  $\delta$  7.92 (2H, d,  $J = 8.4$  Hz), 7.78 (2H, d,  $J = 8.4$  Hz), 7.42 (2H, d,  $J = 8.4$  Hz), 7.35 (2H, d,  $J = 8.4$  Hz), 4.57 (2H, q,  $J = 7.2$  Hz), 2.44 (3H, s), 1.48 (3H, t,  $J = 7.2$  Hz);  $^{13}\text{C}$  NMR (151 MHz,  $\text{CDCl}_3$ )  $\delta$  166.1, 164.6, 145.1, 141.6, 135.6, 131.2, 130.0, 129.9, 129.6, 128.3, 63.5, 21.8, 14.1; IR (film) 2984, 1740, 1609, 1584, 1558, 1404, 1333, 1298, 1211, 1163, 1088, 1011  $\text{cm}^{-1}$ ; HRMS (ESI) Calcd for  $\text{C}_{17}\text{H}_{17}\text{O}_4\text{N}^{35}\text{ClS}^+$  ( $[\text{M}+\text{H}]^+$ ) 366.0567. Found 366.0560.

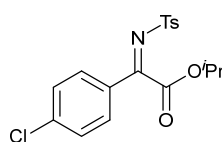

**2n**: colorless sticky oil;  $^1\text{H}$  NMR (600 MHz,  $\text{CDCl}_3$ )  $\delta$  7.92 (2H, d,  $J = 8.4$  Hz), 7.78 (2H, d,  $J = 8.4$  Hz), 7.42 (2H, d,  $J = 8.4$  Hz), 7.35 (2H, d,  $J = 8.4$  Hz), 5.47 (1H, septet,  $J = 6.2$  Hz), 2.44 (3H, s), 1.48 (6H, d,  $J = 6.2$  Hz);  $^{13}\text{C}$  NMR (151 MHz,  $\text{CDCl}_3$ )  $\delta$  166.2, 164.1, 145.0, 141.5, 135.7, 131.2, 130.2, 129.9, 129.6, 128.3, 72.1, 21.8, one carbon atom was not found probably due to overlapping; IR (film) 2984, 1734, 1609, 1584, 1557, 1489, 1404, 1331, 1294, 1215, 1161, 1088, 997  $\text{cm}^{-1}$ ; HRMS (ESI) Calcd for  $\text{C}_{18}\text{H}_{19}\text{O}_4\text{N}^{35}\text{ClS}^+$  ( $[\text{M}+\text{H}]^+$ ) 380.0723. Found 380.0713.

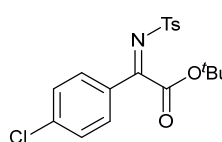

**2o**: white solid;  $^1\text{H}$  NMR (600 MHz,  $\text{CDCl}_3$ )  $\delta$  7.93 (2H, d,  $J = 8.1$  Hz), 7.80 (2H, d,  $J = 8.7$  Hz), 7.41 (2H, d,  $J = 8.7$  Hz), 7.34 (2H, d,  $J = 8.1$  Hz), 2.44 (3H, s), 1.70 (9H, s);  $^{13}\text{C}$  NMR (151 MHz,  $\text{CDCl}_3$ )  $\delta$  166.0, 163.3, 144.9, 141.2, 135.9, 131.2, 130.6, 129.9, 129.5, 128.3, 86.7, 28.2, 21.8; IR (film) 2982, 1734, 1607, 1584, 1558, 1456, 1404, 1371, 1333, 1227, 1161, 1090, 995  $\text{cm}^{-1}$ ; HRMS (ESI) Calcd for  $\text{C}_{19}\text{H}_{21}\text{O}_4\text{N}^{35}\text{ClS}^+$  ( $[\text{M}+\text{H}]^+$ ) 394.0880. Found 394.0875.

### Representative Procedure for the Catalytic Asymmetric Oxidation of *N*-Sulfonyl $\alpha$ -Imino Esters:

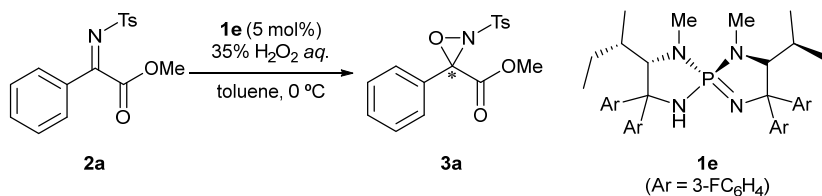

To a solution of  $\alpha$ -imino ester **2a** (63.5 mg, 0.2 mmol) and iminophosphorane **1e** (6.81 mg, 0.01 mmol) in toluene (4.0 mL) was added a 35% aqueous solution of hydrogen peroxide (34.4  $\mu\text{L}$ , 0.4 mmol) dropwise and the reaction mixture was stirred for 12 h at 0  $^\circ\text{C}$  under Ar atmosphere. The resulting solution was diluted with a saturated aqueous solution of  $\text{Na}_2\text{SO}_3$  and extracted with EA twice. The combined organic layers were washed with brine, dried over  $\text{Na}_2\text{SO}_4$ , and filtered. All volatiles were removed under reduced pressure and the crude residue thus obtained was purified by column chromatography on silica gel (H/EA = 20:1  $\rightarrow$  10:1  $\rightarrow$  4:1) to afford oxaziridine **3a** as a white solid (54.7 mg, 0.16 mmol, 82%). The enantiomeric excess of **3a** was determined to be 97% ee by HPLC analysis. **3a**<sup>4</sup>: white solid;  $^1\text{H}$  NMR (600 MHz,  $\text{CDCl}_3$ )  $\delta$  7.96 (2H, d,  $J = 8.4$  Hz), 7.51 (2H, d,  $J = 7.2$  Hz), 7.45 (1H, t,  $J = 7.2$  Hz), 7.41 (2H, d,  $J = 8.4$  Hz), 7.39 (2H, t,  $J = 7.2$  Hz), 4.02 (3H, s), 2.48 (3H, s);  $^{13}\text{C}$  NMR (151 MHz,  $\text{CDCl}_3$ )  $\delta$  164.1, 146.7, 132.7, 131.4, 130.4, 130.2, 129.6, 128.9, 127.4, 84.3, 53.7, 22.0; IR (film) 2955, 1751, 1595, 1454, 1437, 1358, 1277, 1202, 1171, 1088, 1005  $\text{cm}^{-1}$ ; HRMS (ESI)

(4) The  $^1\text{H}$  NMR analysis showed that oxaziridine **3** existed as a mixture of diastereomers with respect to the “stereogenic” nitrogen atom (dr = 10:1 to 7:1), but the diastereomers were supposed to be under equilibrium at room temperature.

Calcd for  $C_{16}H_{15}O_5NNaS^+$  ( $[M+Na]^+$ ) 356.0569. Found 356.0562.;  $[\alpha]_D^{26} +77.0$  ( $c = 4.13$ ,  $CHCl_3$ ) for 97% ee; HPLC AY-3, H/IPA = 4:1, flow rate = 1.0 mL/min,  $\lambda = 230$  nm, 16.9 min (minor enantiomer), 28.3 min (major enantiomer).

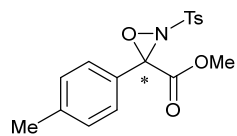

**3b:** colorless oil;  $^1H$  NMR (600 MHz,  $CDCl_3$ )  $\delta$  7.96 (2H, d,  $J = 8.4$  Hz), 7.40 (2H, d,  $J = 8.4$  Hz), 7.38 (2H, d,  $J = 8.4$  Hz), 7.19 (2H, d,  $J = 8.4$  Hz), 4.01 (3H s), 2.48 (3H, s), 2.35 (s, 3H);  $^{13}C$  NMR (151 MHz,  $CDCl_3$ )  $\delta$  164.2, 146.7, 141.8, 132.8, 130.2, 129.6, 127.4, 84.4, 53.6, 22.0, 21.5, two carbon atoms were not found probably due to overlapping; IR (film) 2955, 1749, 1684, 1603, 1437, 1358, 1279, 1204, 1171, 1088, 1007  $cm^{-1}$ ; HRMS (ESI) Calcd for  $C_{17}H_{17}O_5NNaS^+$  ( $[M+Na]^+$ ) 370.0725. Found 370.0713.;  $[\alpha]_D^{26} +55.0$  ( $c = 1.87$ ,  $CHCl_3$ ) for 98% ee; HPLC AY-3, H/IPA = 4:1, flow rate = 1.0 mL/min,  $\lambda = 230$  nm, 21.5 min (minor enantiomer), 27.9 min (major enantiomer).

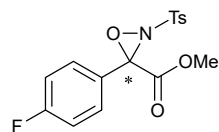

**3c:** white solid;  $^1H$  NMR (600 MHz,  $CDCl_3$ )  $\delta$  7.95 (2H, d,  $J = 8.4$  Hz), 7.50 (2H, dd,  $J_{H-H} = 8.4$  Hz,  $J_{F-H} = 4.8$  Hz), 7.42 (2H, d,  $J = 8.4$  Hz), 7.08 (2H, dd,  $J_{H-H} = 8.4$  Hz,  $J_{F-H} = 8.4$  Hz), 4.02 (3H, s), 2.49 (3H, s);  $^{13}C$  NMR (151 MHz,  $CDCl_3$ )  $\delta$  164.6 (d,  $J_{F-C} = 253.1$  Hz), 163.9, 146.9, 132.5, 130.2, 129.7 (d,  $J_{F-C} = 8.6$  Hz), 129.6, 126.3 (d,  $J_{F-C} = 4.2$  Hz), 116.1 (d,  $J_{F-C} = 23.1$  Hz), 83.7, 53.8, 22.0;  $^{19}F$  NMR (376 MHz,  $CDCl_3$ )  $\delta$  -100.9; IR (film) 2959, 1755, 1597, 1510, 1439, 1360, 1281, 1238, 1204, 1173, 1157, 1090, 1007  $cm^{-1}$ ; HRMS (ESI) Calcd for  $C_{16}H_{14}O_5NFNaS^+$  ( $[M+Na]^+$ ) 374.0469. Found 374.0463.;  $[\alpha]_D^{23} +58.5$  ( $c = 1.35$ ,  $CHCl_3$ ) for 95% ee; HPLC OD-3, H/IPA = 10:1, flow rate = 1.0 mL/min,  $\lambda = 230$  nm, 7.9 min (major enantiomer), 8.9 min (minor enantiomer).

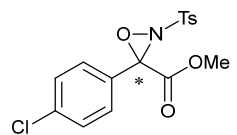

**3d:** white solid;  $^1H$  NMR (400 MHz,  $CDCl_3$ )  $\delta$  7.95 (2H, d,  $J = 8.0$  Hz), 7.44 (2H, d,  $J = 8.8$  Hz), 7.42 (2H, d,  $J = 8.0$  Hz), 7.37 (2H, d,  $J = 8.8$  Hz), 4.02 (3H, s), 2.49 (3H, s);  $^{13}C$  NMR (101 MHz,  $CDCl_3$ )  $\delta$  163.8, 146.9, 137.8, 132.5, 130.2, 129.6, 129.2, 129.0, 128.9, 83.6, 53.9, 22.0; IR (film) 2957, 1755, 1595, 1493, 1439, 1408, 1360, 1275, 1204, 1173, 1090, 1005  $cm^{-1}$ ; HRMS (ESI) Calcd for  $C_{16}H_{14}O_5N^{35}ClNaS^+$  ( $[M+Na]^+$ ) 390.0179. Found 390.0169.;  $[\alpha]_D^{24} +48.0$  ( $c = 1.69$ ,  $CHCl_3$ ) for 96% ee; HPLC OD-3, H/IPA = 19:1, flow rate = 1.0 mL/min,  $\lambda = 230$  nm, 10.0 min (major enantiomer), 11.7 min (minor enantiomer).

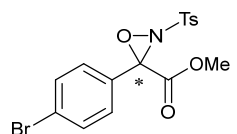

**3e:** white solid;  $^1H$  NMR (400 MHz,  $CDCl_3$ )  $\delta$  7.95 (2H, d,  $J = 8.0$  Hz), 7.53 (2H,  $J = 8.4$  Hz), 7.42 (2H, d,  $J = 8.0$  Hz), 7.37 (2H, d,  $J = 8.4$  Hz), 4.02 (3H, s), 2.49 (3H, s);  $^{13}C$  NMR (101 MHz,  $CDCl_3$ )  $\delta$  163.7, 146.9, 132.4, 132.2, 130.2, 129.6, 129.5, 129.0, 126.1, 83.7, 53.9, 22.0; IR (film) 2957, 1751, 1593, 1489, 1437, 1402, 1358, 1279, 1202, 1171, 1088, 1003  $cm^{-1}$ ; HRMS (ESI) Calcd for  $C_{16}H_{14}O_5N^{79}BrNaS^+$  ( $[M+Na]^+$ ) 433.9674. Found 433.9669.;  $[\alpha]_D^{24} +48.1$  ( $c = 1.75$ ,  $CHCl_3$ ) for 97% ee; HPLC OD-3, H/IPA = 49:1, flow rate = 1.0 mL/min,  $\lambda = 230$  nm, 16.7 min (major enantiomer), 19.6 min (minor enantiomer).

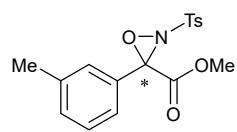

**3f:** colorless oil;  $^1H$  NMR (600 MHz,  $CDCl_3$ )  $\delta$  7.96 (2H, d,  $J = 8.0$  Hz), 7.41 (2H, d,  $J = 8.0$  Hz), 7.33-7.24 (4H, m), 4.01 (s, 3H), 2.48 (s, 3H), 2.34 (s, 3H);  $^{13}C$  NMR (151 MHz,  $CDCl_3$ )  $\delta$  164.2, 146.7, 138.9, 132.7, 132.1, 130.2, 130.1, 129.6, 128.8, 127.7, 124.5, 84.4, 53.7, 22.0, 21.5; IR (film) 2955, 1761, 1595, 1437, 1358, 1333, 1288, 1219, 1171, 1090, 1038  $cm^{-1}$ ; HRMS (ESI) Calcd for  $C_{17}H_{17}O_5NNaS^+$  ( $[M+Na]^+$ ) 370.0720. Found 370.0722.;  $[\alpha]_D^{26} +69.8$  ( $c = 0.82$ ,  $CHCl_3$ ) for 96% ee; HPLC AY-3, H/IPA = 4:1, flow rate = 1.0 mL/min,  $\lambda = 230$  nm, 15.1 min (minor enantiomer), 27.1 min (major enantiomer).

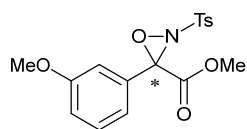

**3g:** colorless oil;  $^1\text{H}$  NMR (400 MHz,  $\text{CDCl}_3$ )  $\delta$  7.95 (2H, d,  $J = 8.2$  Hz), 7.40 (2H, d,  $J = 8.2$  Hz), 7.29 (1H, t,  $J = 7.6$  Hz), 7.11 (1H, d,  $J = 7.6$  Hz), 7.01 (1H, t,  $J = 2.3$  Hz), 6.97 (1H, dd,  $J = 7.6, 2.3$  Hz), 4.00 (3H, s), 3.78 (3H, s), 2.48 (3H, s);  $^{13}\text{C}$  NMR (101 MHz,  $\text{CDCl}_3$ )  $\delta$  164.0, 160.0, 146.8, 132.7, 131.7, 130.2, 130.0, 129.6, 119.7, 117.4, 112.4, 84.2, 55.6, 53.7, 22.0; IR (film) 2957, 1755, 1597, 1489, 1433, 1358, 1290, 1233, 1169, 1088, 1043, 1015  $\text{cm}^{-1}$ ; HRMS (ESI) Calcd for  $\text{C}_{17}\text{H}_{17}\text{O}_6\text{NNaS}^+$  ( $[\text{M}+\text{Na}]^+$ ) 386.0674. Found 386.0668.;  $[\alpha]_{\text{D}}^{25} +71.6$  ( $c = 1.72$ ,  $\text{CHCl}_3$ ) for 97% ee; HPLC OD-3, H/IPA = 10:1, flow rate = 1.0 mL/min,  $\lambda = 230$  nm, 9.5 min (major enantiomer), 12.6 min (minor enantiomer).

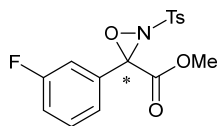

**3h:** colorless oil;  $^1\text{H}$  NMR (400 MHz,  $\text{CDCl}_3$ )  $\delta$  7.94 (2H, d,  $J = 8.4$  Hz), 7.43 (2H, d,  $J = 8.4$  Hz), 7.37 (1H, td,  $J_{\text{H-H}} = 8.0$  Hz,  $J_{\text{F-H}} = 5.6$  Hz), 7.32 (1H, dt,  $J = 8.0, 1.4$  Hz), 7.21 (1H, ddd,  $J_{\text{F-H}} = 8.0$  Hz,  $J_{\text{H-H}} = 2.2, 1.4$  Hz), 7.15 (1H, dddd,  $J_{\text{F-H}} = 8.0$  Hz,  $J_{\text{H-H}} = 8.0, 2.2, 1.4$  Hz), 4.03 (3H, s), 2.49 (3H, s);  $^{13}\text{C}$  NMR (101 MHz,  $\text{CDCl}_3$ )  $\delta$  163.6, 161.5 (d,  $J_{\text{F-C}} = 249.7$  Hz), 146.9, 132.7 (d,  $J_{\text{F-C}} = 7.8$  Hz), 132.4, 130.6 (d,  $J_{\text{F-C}} = 7.8$  Hz), 130.2, 129.6, 123.1 (d,  $J_{\text{F-C}} = 2.9$  Hz), 118.5 (d,  $J_{\text{F-C}} = 21.3$  Hz), 114.6 (d,  $J_{\text{F-C}} = 24.2$  Hz), 83.3, 53.8, 21.9;  $^{19}\text{F}$  NMR (376 MHz,  $\text{CDCl}_3$ )  $\delta$  -110.9; IR (film) 2957, 1763, 1593, 1360, 1335, 1288, 1221, 1171, 1088, 1018  $\text{cm}^{-1}$ ; HRMS (ESI) Calcd for  $\text{C}_{16}\text{H}_{14}\text{O}_5\text{NFNaS}^+$  ( $[\text{M}+\text{Na}]^+$ ) 374.0474. Found 374.0466.;  $[\alpha]_{\text{D}}^{24} +73.8$  ( $c = 0.84$ ,  $\text{CHCl}_3$ ) for 95% ee; HPLC OD-3, H/IPA = 10:1, flow rate = 1.0 mL/min,  $\lambda = 230$  nm, 7.6 min (major enantiomer), 10.1 min (minor enantiomer).

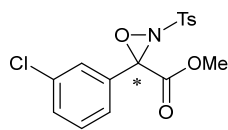

**3i:** colorless oil;  $^1\text{H}$  NMR (400 MHz,  $\text{CDCl}_3$ )  $\delta$  7.95 (2H, d,  $J = 8.4$  Hz), 7.49 (1H, t,  $J = 1.8$  Hz), 7.44-7.39 (4H, m), 7.33 (1H, t,  $J = 8.0$  Hz), 4.02 (3H, s), 2.49 (3H, s);  $^{13}\text{C}$  NMR (151 MHz,  $\text{CDCl}_3$ )  $\delta$  163.6, 147.0, 135.1, 132.3<sub>8</sub>, 132.3<sub>6</sub>, 131.6, 130.3, 130.2, 129.6, 127.5, 125.6, 83.4, 53.9, 22.0; IR (film) 2955, 1755, 1595, 1427, 1360, 1331, 1287, 1204, 1173, 1088, 1018  $\text{cm}^{-1}$ ; HRMS (ESI) Calcd for  $\text{C}_{16}\text{H}_{14}\text{O}_5\text{N}^{35}\text{ClNaS}^+$  ( $[\text{M}+\text{Na}]^+$ ) 390.0179. Found 390.0174.;  $[\alpha]_{\text{D}}^{27} +65.5$  ( $c = 1.29$ ,  $\text{CHCl}_3$ ) for 95% ee; HPLC AY-3, H/IPA = 4:1, flow rate = 1.0 mL/min,  $\lambda = 210$  nm, 12.5 min (minor enantiomer), 22.7 min (major enantiomer).

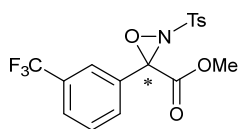

**3j:** colorless oil;  $^1\text{H}$  NMR (600 MHz,  $\text{CDCl}_3$ )  $\delta$  7.96 (2H, d,  $J = 8.2$  Hz), 7.74 (1H, s), 7.73 (1H, d,  $J = 7.8$  Hz), 7.72 (1H, d,  $J = 7.8$  Hz), 7.54 (1H, t,  $J = 7.8$  Hz), 7.43 (2H, d,  $J = 8.2$  Hz), 4.04 (3H, s), 2.49 (3H, s);  $^{13}\text{C}$  NMR (151 MHz,  $\text{CDCl}_3$ )  $\delta$  163.6, 147.1, 132.3, 131.7, 131.6 (q,  $J_{\text{F-C}} = 33.2$  Hz), 130.9, 130.3, 129.6<sub>4</sub>, 129.5<sub>7</sub>, 128.2 (q,  $J_{\text{F-C}} = 2.9$  Hz), 124.3 (q,  $J_{\text{F-C}} = 4.3$  Hz), 123.5 (q,  $J_{\text{F-C}} = 271.8$  Hz), 83.3, 54.0, 22.0;  $^{19}\text{F}$  NMR (376 MHz,  $\text{CDCl}_3$ )  $\delta$  -62.8; IR (film) 2957, 1757, 1595, 1437, 1362, 1333, 1263, 1171, 1130, 1018  $\text{cm}^{-1}$ ; HRMS (ESI) Calcd for  $\text{C}_{17}\text{H}_{14}\text{O}_5\text{NF}_3\text{NaS}^+$  ( $[\text{M}+\text{Na}]^+$ ) 424.0442. Found 424.0432.;  $[\alpha]_{\text{D}}^{24} +52.5$  ( $c = 0.82$ ,  $\text{CHCl}_3$ ) for 85% ee; HPLC AY-3, H/IPA = 4:1, flow rate = 1.0 mL/min,  $\lambda = 230$  nm, 7.5 min (minor enantiomer), 14.5 min (major enantiomer).

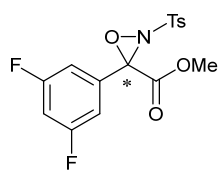

**3k:** colorless oil;  $^1\text{H}$  NMR (600 MHz,  $\text{CDCl}_3$ )  $\delta$  7.94 (2H, d,  $J = 8.2$  Hz), 7.43 (2H, d,  $J = 8.2$  Hz), 7.07 (2H, dt,  $J_{\text{F-H}} = 7.8$  Hz,  $J_{\text{H-H}} = 2.2$  Hz), 6.91 (1H, tt,  $J_{\text{F-H}} = 8.4$  Hz,  $J_{\text{H-H}} = 2.2$  Hz), 4.04 (3H, s), 2.49 (3H, s);  $^{13}\text{C}$  NMR (151 MHz,  $\text{CDCl}_3$ )  $\delta$  163.3, 163.1 (dd,  $J_{\text{F-C}} = 250.9, 12.3$  Hz), 147.1, 134.1 (t,  $J_{\text{F-C}} = 8.8$  Hz), 132.2, 130.3, 129.6, 110.9 (dd,  $J_{\text{F-C}} = 22.5, 6.5$  Hz), 107.0 (t,  $J_{\text{F-C}} = 25.3$  Hz), 82.8, 54.1, 22.0;  $^{19}\text{F}$  NMR (376 MHz,  $\text{CDCl}_3$ )  $\delta$  -107.0; IR (film) 2959, 1755, 1601, 1437, 1362, 1339, 1244, 1173, 1126, 1090, 993  $\text{cm}^{-1}$ ; HRMS

(ESI) Calcd for  $C_{16}H_{13}O_5NF_2NaS^+$  ( $[M+Na]^+$ ) 392.0380. Found 392.0376.;  $[\alpha]_D^{24} +50.8$  ( $c = 1.05$ ,  $CHCl_3$ ) for 82% ee; HPLC AY-3, H/IPA = 4:1, flow rate = 1.0 mL/min,  $\lambda = 230$  nm, 7.8 min (minor enantiomer), 14.3 min (major enantiomer).

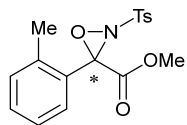

**3l:** colorless oil;  $^1H$  NMR (400 MHz,  $CDCl_3$ )  $\delta$  7.96 (2H, d,  $J = 8.0$  Hz), 7.44 (1H, d,  $J = 8.0$  Hz), 7.39 (2H, d,  $J = 8.0$  Hz), 7.30 (1H, t,  $J = 8.0$  Hz), 7.20 (1H, t,  $J = 8.0$  Hz), 7.17 (1H, d,  $J = 8.0$  Hz), 3.90 (3H, s), 2.51 (3H, s), 2.46 (3H, s);  $^{13}C$  NMR (101 MHz,  $CDCl_3$ )  $\delta$  164.3, 146.8, 136.9, 132.7, 131.0, 130.3, 130.2, 129.6, 129.2, 127.8, 126.0, 85.7, 53.7, 21.9, 19.0; IR (film) 2955, 1759, 1595, 1456, 1437, 1360, 1271, 1173, 1090, 1003, 916  $cm^{-1}$ ; HRMS (ESI) Calcd for  $C_{17}H_{17}O_5NNaS^+$  ( $[M+Na]^+$ ) 370.0725. Found 370.0719.;  $[\alpha]_D^{25} +70.1$  ( $c = 1.05$ ,  $CHCl_3$ ) for 99% ee; HPLC AY-3, H/IPA = 4:1, flow rate = 1.0 mL/min,  $\lambda = 230$  nm, 9.7 min (minor enantiomer), 13.2 min (major enantiomer).

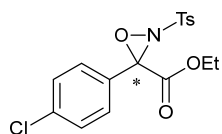

**3m:** white solid;  $^1H$  NMR (600 MHz,  $CDCl_3$ )  $\delta$  7.95 (2H, d,  $J = 8.4$  Hz), 7.45 (2H, d,  $J = 7.8$  Hz), 7.41 (2H, d,  $J = 8.4$  Hz), 7.36 (2H, d,  $J = 7.8$  Hz), 4.51 (1H, dq,  $J = 10.8, 7.2$  Hz), 4.46 (1H, dq,  $J = 10.8, 7.2$  Hz), 2.48 (3H, s), 1.44 (3H, t,  $J = 7.2$  Hz);  $^{13}C$  NMR (151 MHz,  $CDCl_3$ )  $\delta$  163.3, 146.8, 137.7, 132.6, 130.2, 129.6, 129.19, 129.16, 128.9, 83.7, 63.5, 22.0, 14.0; IR (film) 2986, 1759, 1597, 1493, 1360, 1275, 1192, 1171, 1090, 1015  $cm^{-1}$ ; HRMS (ESI) Calcd for  $C_{17}H_{16}O_5N^{35}ClNaS^+$  ( $[M+Na]^+$ ) 404.0335. Found 404.0327.;  $[\alpha]_D^{24} +54.5$  ( $c = 1.20$ ,  $CHCl_3$ ) for 95% ee; HPLC OD-3, H/IPA = 19:1, flow rate = 1.0 mL/min,  $\lambda = 230$  nm, 8.0 min (major enantiomer), 8.8 min (minor enantiomer).

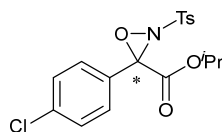

**3n:** colorless oil;  $^1H$  NMR (600 MHz,  $CDCl_3$ )  $\delta$  7.95 (2H, d,  $J = 8.4$  Hz), 7.45 (2H, d,  $J = 7.8$  Hz), 7.41 (2H, d,  $J = 8.4$  Hz), 7.36 (2H, d,  $J = 7.8$  Hz), 5.35 (1H, septet,  $J = 6.3$  Hz), 2.48 (3H, s), 1.43 (3H, d,  $J = 6.3$  Hz), 1.42 (3H, d,  $J = 6.3$  Hz);  $^{13}C$  NMR (151 MHz,  $CDCl_3$ )  $\delta$  162.7, 146.7, 137.6, 132.8, 130.2, 129.5, 129.4, 129.2, 128.9, 83.6, 72.0, 22.0, 21.7, 21.6; IR (film) 2984, 2934, 1755, 1597, 1493, 1360, 1279, 1194, 1169, 1090, 991  $cm^{-1}$ ; HRMS (ESI) Calcd for  $C_{18}H_{18}O_5N^{35}ClNaS^+$  ( $[M+Na]^+$ ) 418.0492. Found 418.0489.;  $[\alpha]_D^{24} +55.6$  ( $c = 0.94$ ,  $CHCl_3$ ) for 95% ee; HPLC OD-3, H/IPA = 19:1, flow rate = 1.0 mL/min,  $\lambda = 230$  nm, 6.6 min (major enantiomer), 7.3 min (minor enantiomer).

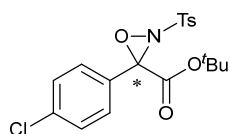

**3o:** white solid;  $^1H$  NMR (600 MHz,  $CDCl_3$ )  $\delta$  7.96 (2H, d,  $J = 8.4$  Hz), 7.46 (2H, d,  $J = 7.8$  Hz), 7.40 (2H, d,  $J = 8.4$  Hz), 7.36 (2H, d,  $J = 7.8$  Hz), 2.48 (3H, s), 1.63 (9H, s);  $^{13}C$  NMR (151 MHz,  $CDCl_3$ )  $\delta$  161.9, 146.6, 137.4, 133.1, 130.2, 129.9, 129.5, 129.1, 128.9, 86.2, 83.7, 28.0, 22.0; IR (film) 2982, 1749, 1597, 1493, 1360, 1283, 1202, 1169, 1150, 1090, 988, 912  $cm^{-1}$ ; HRMS (ESI) Calcd for  $C_{19}H_{20}O_5N^{35}ClNaS^+$  ( $[M+Na]^+$ ) 432.0648. Found 432.0645.;  $[\alpha]_D^{26} +64.2$  ( $c = 1.04$ ,  $CHCl_3$ ) for 96% ee; HPLC OD-3, H/IPA = 19:1, flow rate = 1.0 mL/min,  $\lambda = 230$  nm, 5.9 min (major enantiomer), 6.6 min (minor enantiomer).

### Representative Procedure for Asymmetric Rubottom Oxidation of Silyl Enol Ether:

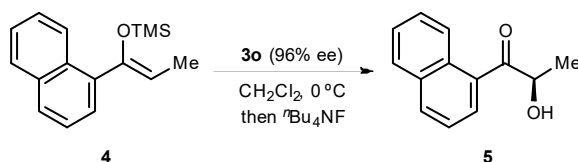



Oxaziridine **3o** (60.6 mg, 0.15 mmol) was dissolved in CH<sub>2</sub>Cl<sub>2</sub> (1.2 mL) and the solution was cooled to 0 °C. Silyl enol ether **4<sup>5</sup>** (30.8 mg, 0.12 mmol) was added to the solution slowly and the reaction mixture was stirred for 12 h at 0 °C. The reaction was quenched by addition of dimethyl sulfide (20.0 μL) and the stirring was continued for 1 h. Then, a 1.0 M solution of TBAF in THF (150 μL, 0.15 mmol) was added and the resulting mixture was further stirred for 30 min at 0 °C. The resulting solution was diluted with H<sub>2</sub>O and extracted with EA twice. The combined organic extracts were washed with brine, dried over Na<sub>2</sub>SO<sub>4</sub>, and filtered. The solvent was removed under reduced pressure and the crude residue was purified by column chromatography on silica gel (H/EA = 20:1 → 10:1 → 4:1) to afford α-hydroxy ketone **5** as a colorless oil (22.1 mg, 0.11 mmol, 90%). The enantiomeric excess of **5** was determined to be 92% ee by HPLC analysis. **5<sup>6</sup>**: <sup>1</sup>H NMR (600 MHz, CDCl<sub>3</sub>) δ 8.49 (1H, d, *J* = 7.8 Hz), 8.05 (1H, d, *J* = 7.8 Hz), 7.91 (1H, d, *J* = 7.8 Hz), 7.79 (1H, d, *J* = 7.8 Hz), 7.63 (1H, dt, *J* = 7.8, 1.4 Hz), 7.58 (1H, t, *J* = 7.8 Hz), 7.53 (1H, t, *J* = 7.8 Hz), 5.24 (1H, dq, *J* = 7.2, 5.4 Hz), 3.94 (1H, d, *J* = 5.4 Hz), 1.36 (3H, d, *J* = 7.2 Hz); [α]<sub>D</sub><sup>27</sup> +150.3 (*c* = 1.68, CHCl<sub>3</sub>) for 92% ee; HPLC OD-3, H/IPA = 10:1, flow rate = 1.0 mL/min, λ = 210 nm, 9.0 min (minor enantiomer), 9.8 min (major enantiomer).

### Representative Procedure for Dual Catalytic Asymmetric Rubottom Oxidation of Silyl Enol Ether:

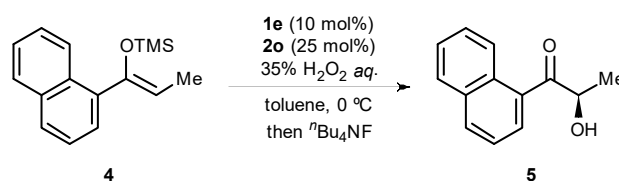

Silyl enol ether **4** (25.6 mg, 0.1 mmol), iminophosphorane **1e** (6.81 mg, 0.01 mmol), and α-imino ester **2o** (9.85 mg, 0.025 mmol) were dissolved into toluene (200 μL) at 0 °C. A 35% aqueous solution of hydrogen peroxide (17.2 μL, 0.2 mmol) was added to the solution dropwise and the reaction mixture was stirred for 72 h at 0 °C. The reaction was quenched by addition of dimethyl sulfide (20.0 μL). After 30 min of stirring, a saturated aqueous solution of Na<sub>2</sub>SO<sub>3</sub> was added to the solution and the whole mixture was extracted with EA three times. The combined organic extracts were washed with brine, dried over Na<sub>2</sub>SO<sub>4</sub>, and filtered. All volatiles were removed by evaporation and the residue was dissolved into CH<sub>2</sub>Cl<sub>2</sub> (1.0 mL). To the solution was added a 1 M solution of TBAF in THF (120 μL, 0.12 mmol) and the mixture was stirred for 30 min at 0 °C. The resulting solution was diluted with H<sub>2</sub>O and extracted with EA twice. The combined organic layers were washed with brine, dried over Na<sub>2</sub>SO<sub>4</sub>, and filtered. The solvent was removed under reduced pressure and the crude material thus obtained was purified by column chromatography on silica gel (H/EA = 20:1 → 10:1 → 4:1) to afford the product **5** as a colorless oil (18.2 mg, 0.091 mmol, 91%). The enantiomeric excess of the product was determined to be 92% ee by HPLC analysis.

### Preparation of Allylic Sulfonamides:

Allylic and homoallylic sulfonamides **8** were prepared from the corresponding allylic or homoallylic bromides and aryl sulfonamide according to the literature procedure.<sup>7</sup>

(5) S. E. Denmark, S. Rossi, M. P. Webster and H. Wang, *J. Am. Chem. Soc.*, 2014, **136**, 13016.

(6) R. J. Lukas, A. Z. Muresan, M. I. Damaj, B. E. Blough, X. Huang, H. A. Navarro, W. Mascarella, J. B. Eaton, S. K. Marxer-Miller and F. I. Carroll, *J. Med. Chem.*, 2010, **53**, 4731.

(7) W. Wang, J. Yang, F. Wang and M. Shi, *Organometallics*, 2011, **30**, 3859.

**8a<sup>8</sup>**: white solid; <sup>1</sup>H NMR (400 MHz, CDCl<sub>3</sub>) δ 7.75 (2H, d, *J* = 8.0 Hz), 7.31 (2H, d, *J* = 8.0 Hz), 5.06 (1H, t, *J* = 6.4 Hz), 4.17 (1H, br), 3.54 (2H, t, *J* = 6.4 Hz), 2.43 (3H, s), 1.64 (3H, s), 1.54 (3H, s).

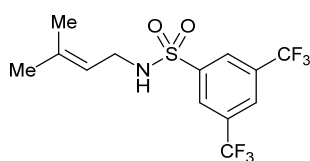

**8b**: white solid; <sup>1</sup>H NMR (600 MHz, CDCl<sub>3</sub>) δ 8.31 (2H, s), 8.07 (1H, s), 5.00 (1H, t, *J* = 6.6 Hz), 4.57 (1H, br), 3.69 (2H, t, *J* = 6.6 Hz), 1.62 (3H, s), 1.58 (3H, s); <sup>13</sup>C NMR (151 MHz, CDCl<sub>3</sub>) δ 143.8, 138.9, 133.0 (q, *J*<sub>F-C</sub> = 34.6 Hz), 127.5, 126.2, 122.6 (q, *J*<sub>F-C</sub> = 273.3 Hz), 118.4, 41.4, 25.6, 17.9; <sup>19</sup>F NMR (376 MHz, CDCl<sub>3</sub>) δ -62.9; IR (film) 3285, 2980, 1423, 1361, 1341, 1281, 1159, 1136, 1040, 903 cm<sup>-1</sup>; HRMS (ESI) Calcd for C<sub>13</sub>H<sub>12</sub>O<sub>2</sub>NF<sub>6</sub>S<sup>-</sup> ([M-H]<sup>-</sup>) 360.0493. Found 360.0490.

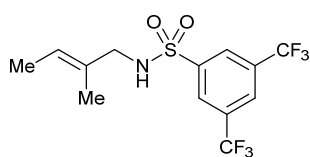

**8c**: colorless oil; <sup>1</sup>H NMR (600 MHz, CDCl<sub>3</sub>) δ 8.30 (2H, s), 8.06 (1H, s), 5.39 (1H, q, *J* = 6.6 Hz), 4.79 (1H, br), 3.60 (2H, d, *J* = 6.0 Hz), 1.50 (3H, d, *J* = 6.6 Hz), 1.49 (3H, s); <sup>13</sup>C NMR (151 MHz, CDCl<sub>3</sub>) δ 143.7, 132.9 (q, *J*<sub>F-C</sub> = 34.7 Hz), 130.1, 127.5, 126.2 (q, *J*<sub>F-C</sub> = 3.6 Hz), 124.6, 122.6 (q, *J*<sub>F-C</sub> = 273.2 Hz), 51.5, 13.8, 13.3; <sup>19</sup>F NMR (376 MHz, CDCl<sub>3</sub>) δ -62.9; IR (film) 3296, 3088, 2934, 2864, 1418, 1362, 1275, 1165, 1130, 1113, 1051, 905 cm<sup>-1</sup>; HRMS (ESI) Calcd for C<sub>13</sub>H<sub>12</sub>O<sub>2</sub>NF<sub>6</sub>S<sup>-</sup> ([M-H]<sup>-</sup>) 360.0493. Found 360.0489.

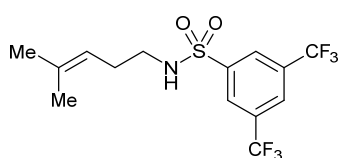

**8d**: white solid; <sup>1</sup>H NMR (600 MHz, CDCl<sub>3</sub>) δ 8.31 (2H, s), 8.07 (1H, s), 4.93 (1H, t, *J* = 6.9 Hz), 4.56 (1H, br), 3.06 (2H, q, *J* = 6.9 Hz), 2.20 (2H, q, *J* = 6.9 Hz), 1.68 (3H, s), 1.58 (3H, s); <sup>13</sup>C NMR (151 MHz, CDCl<sub>3</sub>) δ 143.3, 136.6, 133.1 (q, *J*<sub>F-C</sub> = 33.2 Hz), 127.4, 126.2, 122.5 (q, *J*<sub>F-C</sub> = 273.3 Hz), 119.1, 43.2, 28.3, 25.8, 17.9; <sup>19</sup>F NMR (376 MHz, CDCl<sub>3</sub>) δ -62.9; IR (film) 3287, 2986, 1626, 1427, 1360, 1281, 1161, 1136, 1069, 902 cm<sup>-1</sup>; HRMS (ESI) Calcd for C<sub>14</sub>H<sub>14</sub>O<sub>2</sub>NF<sub>6</sub>S<sup>-</sup> ([M-H]<sup>-</sup>) 374.0649. Found 374.0645.

### Representative Procedure for Asymmetric Epoxidation of Allylic Sulfonamides:

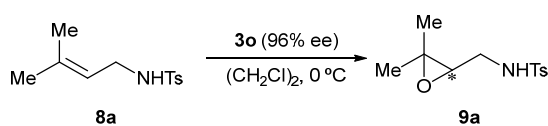

To a solution of allylic sulfonamide **8a** (24.0 mg, 0.1 mmol) in (CH<sub>2</sub>Cl)<sub>2</sub> (300 μL) was added oxaziridine **3o** (48.8 mg, 0.12 mmol) at 0 °C. After being stirred for 72 h, the reaction mixture was quenched by addition of dimethyl sulfide (20.0 μL) and was further stirred for 30 min at 0 °C. The solvent was removed under reduced pressure and the crude mixture was purified by column chromatography on silica gel (pure CH<sub>2</sub>Cl<sub>2</sub> then H/EA = 4:1 → 2:1) to afford **9a** as a white solid (20.9 mg, 0.082 mmol, 82%). The enantiomeric excess of **9a** was determined to be 88% ee by HPLC analysis. **9a<sup>9</sup>**: white solid; <sup>1</sup>H NMR (600 MHz, CDCl<sub>3</sub>) δ 7.76 (2H, d, *J* = 8.4 Hz), 7.32 (2H, d, *J* = 8.4 Hz), 4.70 (1H, br), 3.28 (1H, ddd, *J* = 13.6, 8.1, 5.0 Hz), 2.97 (1H, ddd, *J* = 13.6, 6.6, 5.0 Hz), 2.84 (1H, dd, *J* = 6.6, 5.0 Hz), 2.43 (3H, s), 1.26 (3H, s), 1.21 (3H, s); [ $\alpha$ ]<sub>D</sub><sup>27</sup> +37.0 (*c* = 1.52, CHCl<sub>3</sub>) for 88% ee; HPLC IA, H/IPA = 10:1, flow rate = 1.0 mL/min, λ = 210 nm, 26.3 min, (minor enantiomer), 37.5 min (major enantiomer).

(8) K.-B. Wang, R.-Q. Ran, S.-D. Xiu and C.-Y. Li, *Org. Lett.*, 2013, **15**, 2374.

(9) J. L. Olivares-Romero, Z. Li and H. Yamamoto, *J. Am. Chem. Soc.*, 2012, **134**, 5440.

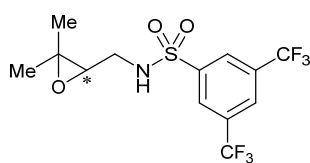

**9b**: white solid;  $^1\text{H}$  NMR (400 MHz,  $\text{CDCl}_3$ )  $\delta$  8.33 (2H, s), 8.09 (1H, s), 5.06 (1H, br), 3.46 (1H, ddd,  $J = 13.6, 8.0, 4.4$  Hz), 3.03 (1H, ddd,  $J = 13.6, 8.0, 4.4$  Hz), 2.88 (1H, dd,  $J = 8.0, 4.4$  Hz), 1.30 (3H, s), 1.26 (3H, s);  $^{13}\text{C}$  NMR (151 MHz,  $\text{CDCl}_3$ )  $\delta$  143.3, 133.2 (q,  $J_{\text{F-C}} = 34.7$  Hz), 127.5, 126.5, 122.6 (q,  $J_{\text{F-C}} = 273.2$  Hz), 61.8, 59.7, 43.2, 24.5, 18.9;  $^{19}\text{F}$  NMR (376 MHz,  $\text{CDCl}_3$ )  $\delta$  -62.9; IR (film) 3262, 3084, 1447, 1354, 1288, 1165, 1134, 1070, 903  $\text{cm}^{-1}$ ; HRMS (ESI) Calcd for  $\text{C}_{13}\text{H}_{13}\text{O}_3\text{NF}_6\text{NaS}^+$  ( $[\text{M}+\text{Na}]^+$ ) 400.0418. Found 400.0409.;  $[\alpha]_{\text{D}}^{27} +34.5$  ( $c = 1.14$ ,  $\text{CHCl}_3$ ) for 92% ee; HPLC OX-3, H/IPA = 49:1, flow rate = 0.5 mL/min,  $\lambda = 210$  nm, 28.7 min (major enantiomer), 32.7 min (minor enantiomer).

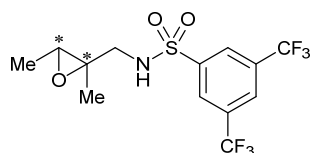

**9c**: white solid;  $^1\text{H}$  NMR (600 MHz,  $\text{CDCl}_3$ )  $\delta$  8.29 (2H, s), 8.08 (1H, s), 5.08 (1H, br), 3.22 (1H, dd,  $J = 13.2, 5.1$  Hz), 3.15 (1H, dd,  $J = 13.2, 7.5$  Hz), 3.08 (1H, q,  $J = 5.4$  Hz), 1.30 (3H, d,  $J = 5.4$  Hz), 1.29 (3H, s);  $^{13}\text{C}$  NMR (151 MHz,  $\text{CDCl}_3$ )  $\delta$  143.2, 133.1 (q,  $J_{\text{F-C}} = 34.7$  Hz), 127.4, 126.4 (q,  $J_{\text{F-C}} = 2.9$  Hz), 122.6 (q,  $J_{\text{F-C}} = 274.8$  Hz), 59.4, 56.9, 48.5, 15.0, 13.6;  $^{19}\text{F}$  NMR (376 MHz,  $\text{CDCl}_3$ )  $\delta$  -62.9; IR (film) 3237, 3088, 1626, 1423, 1354, 1285, 1165, 1132, 905  $\text{cm}^{-1}$ ; HRMS (ESI) Calcd for  $\text{C}_{13}\text{H}_{13}\text{O}_3\text{NF}_6\text{NaS}^+$  ( $[\text{M}+\text{Na}]^+$ ) 400.0418. Found 400.0417.;  $[\alpha]_{\text{D}}^{25} -9.3$  ( $c = 2.42$ ,  $\text{CHCl}_3$ ) for 87% ee; HPLC OX-3, H/IPA = 19:1, flow rate = 0.5 mL/min,  $\lambda = 210$  nm, 12.3 min (minor enantiomer), 13.5 min (major enantiomer).

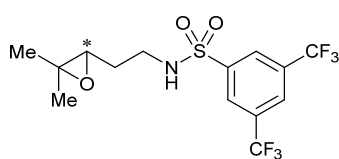

**9d**: white solid;  $^1\text{H}$  NMR (600 MHz,  $\text{CDCl}_3$ )  $\delta$  8.33 (2H, s), 8.07 (1H, s), 5.44 (1H, br), 3.32 (1H, dq,  $J = 12.6, 5.4$  Hz), 3.19 (1H, ddt,  $J = 12.6, 9.0, 5.4$  Hz), 2.73 (1H, dd,  $J = 9.0, 5.4$  Hz), 1.96 (1H, dq,  $J = 14.1, 5.4$  Hz), 1.56 (1H, dtd,  $J = 14.1, 9.0, 5.4$  Hz), 1.29 (3H, s), 1.24 (3H, s);  $^{13}\text{C}$  NMR (151 MHz,  $\text{CDCl}_3$ )  $\delta$  143.2, 133.1 (q,  $J_{\text{F-C}} = 33.8$  Hz), 127.5, 126.3 (q,  $J_{\text{F-C}} = 2.9$  Hz), 122.6 (q,  $J_{\text{F-C}} = 274.8$  Hz), 62.4, 58.7, 41.8, 28.4, 24.6, 18.9;  $^{19}\text{F}$  NMR (376 MHz,  $\text{CDCl}_3$ )  $\delta$  -62.9; IR (film) 3289, 2974, 2930, 1626, 1435, 1360, 1279, 1161, 1136, 1113, 905  $\text{cm}^{-1}$ ; HRMS (ESI) Calcd for  $\text{C}_{14}\text{H}_{15}\text{O}_3\text{NF}_6\text{NaS}^+$  ( $[\text{M}+\text{Na}]^+$ ) 414.0575. Found 414.0558.;  $[\alpha]_{\text{D}}^{25} +16.7$  ( $c = 2.75$ ,  $\text{CHCl}_3$ ) for 90% ee; HPLC AY-3, H/IPA = 19:1, flow rate = 1.0 mL/min,  $\lambda = 210$  nm, 14.0 min (minor enantiomer), 18.1 min (major enantiomer).

# Copies of $^1\text{H}$ and $^{13}\text{C}$ NMR Spectra:

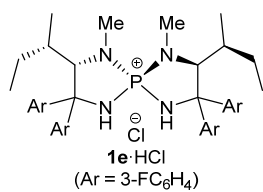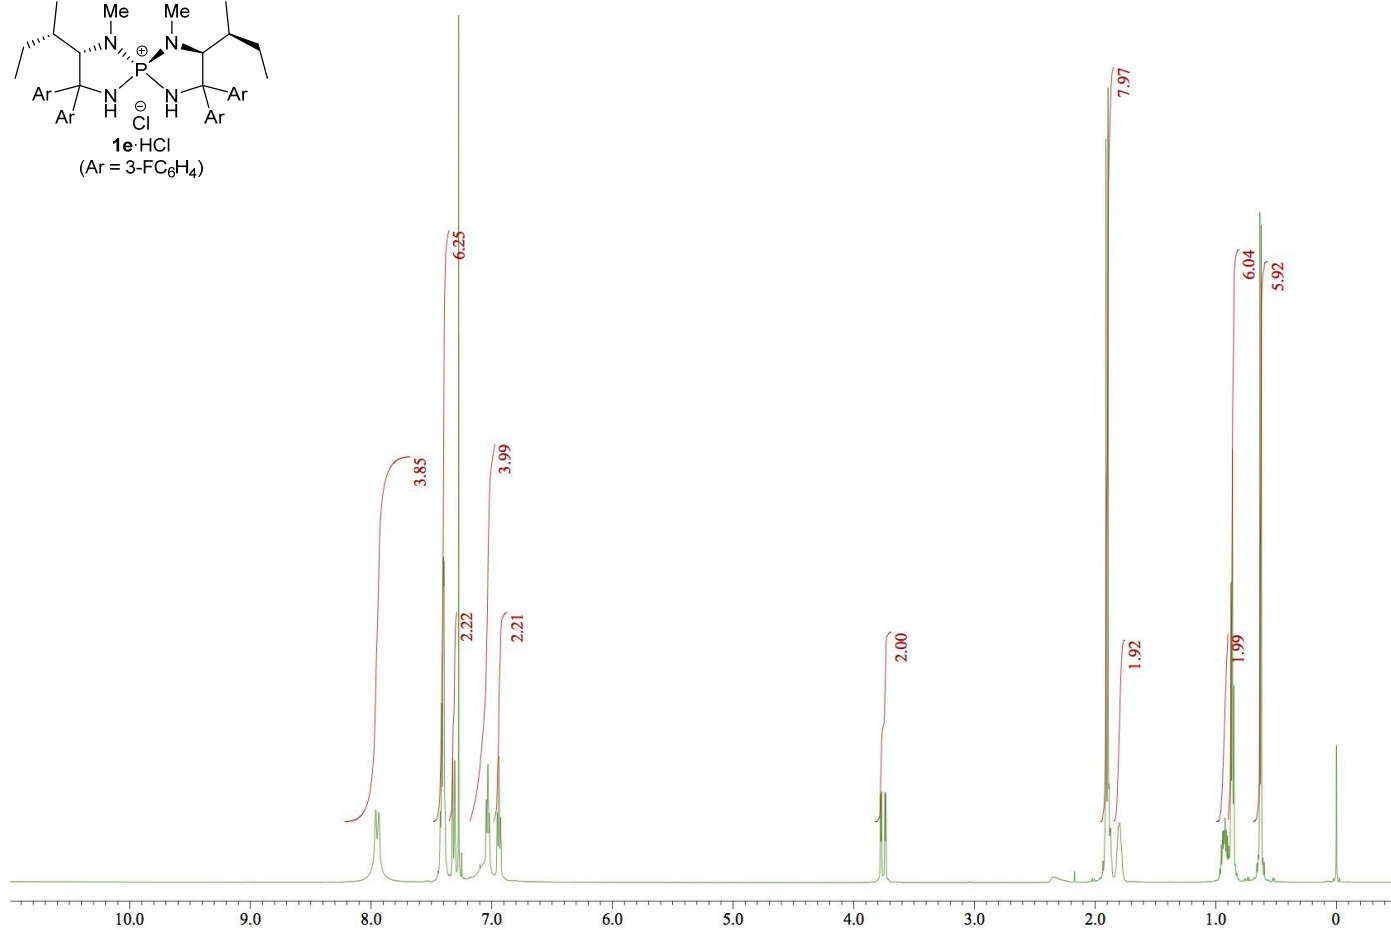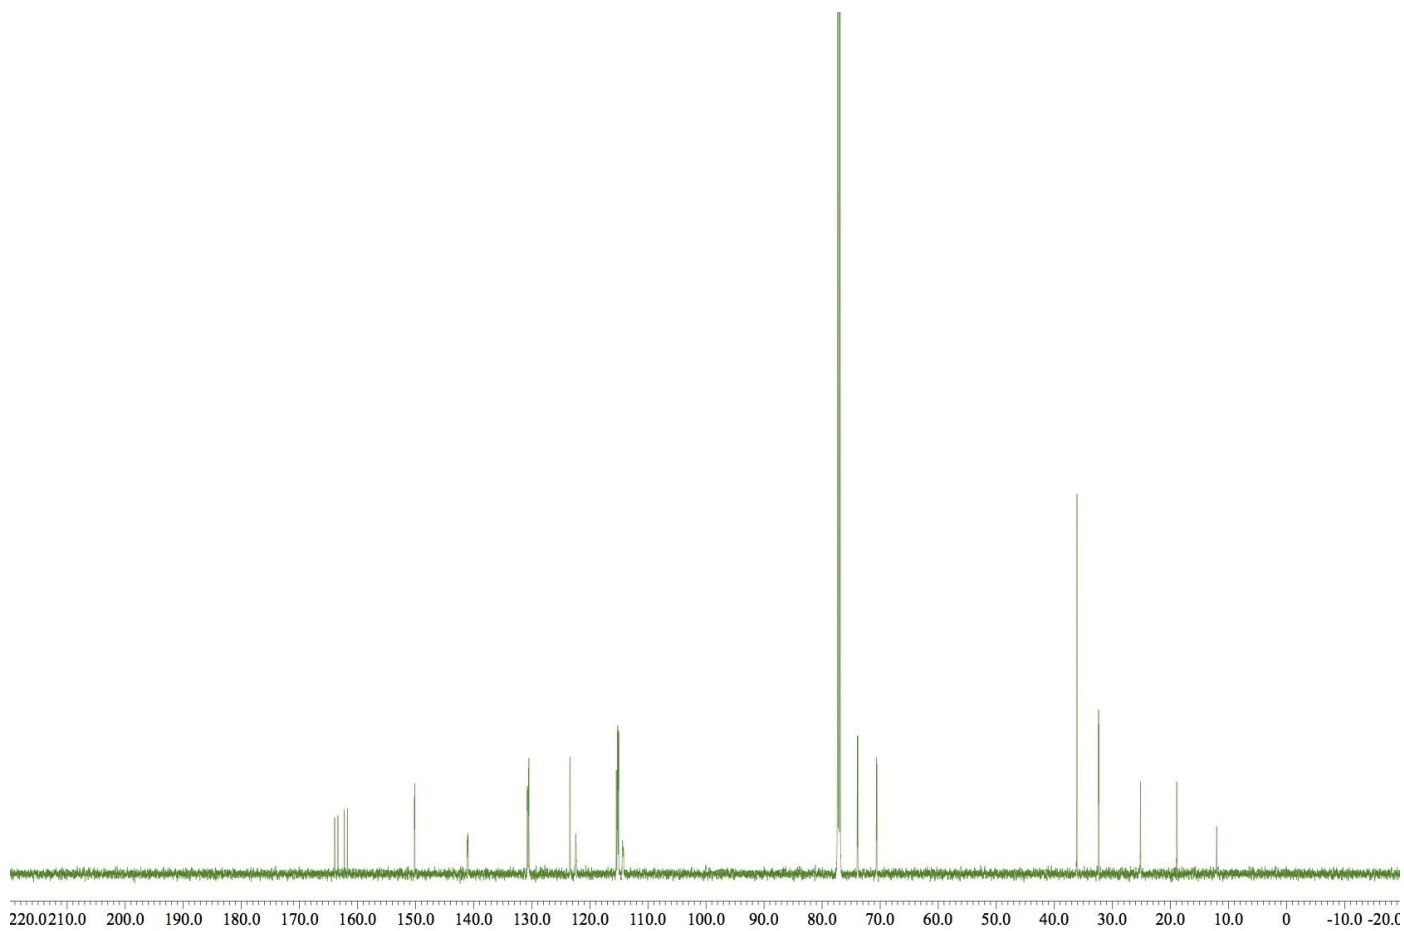

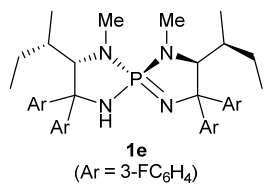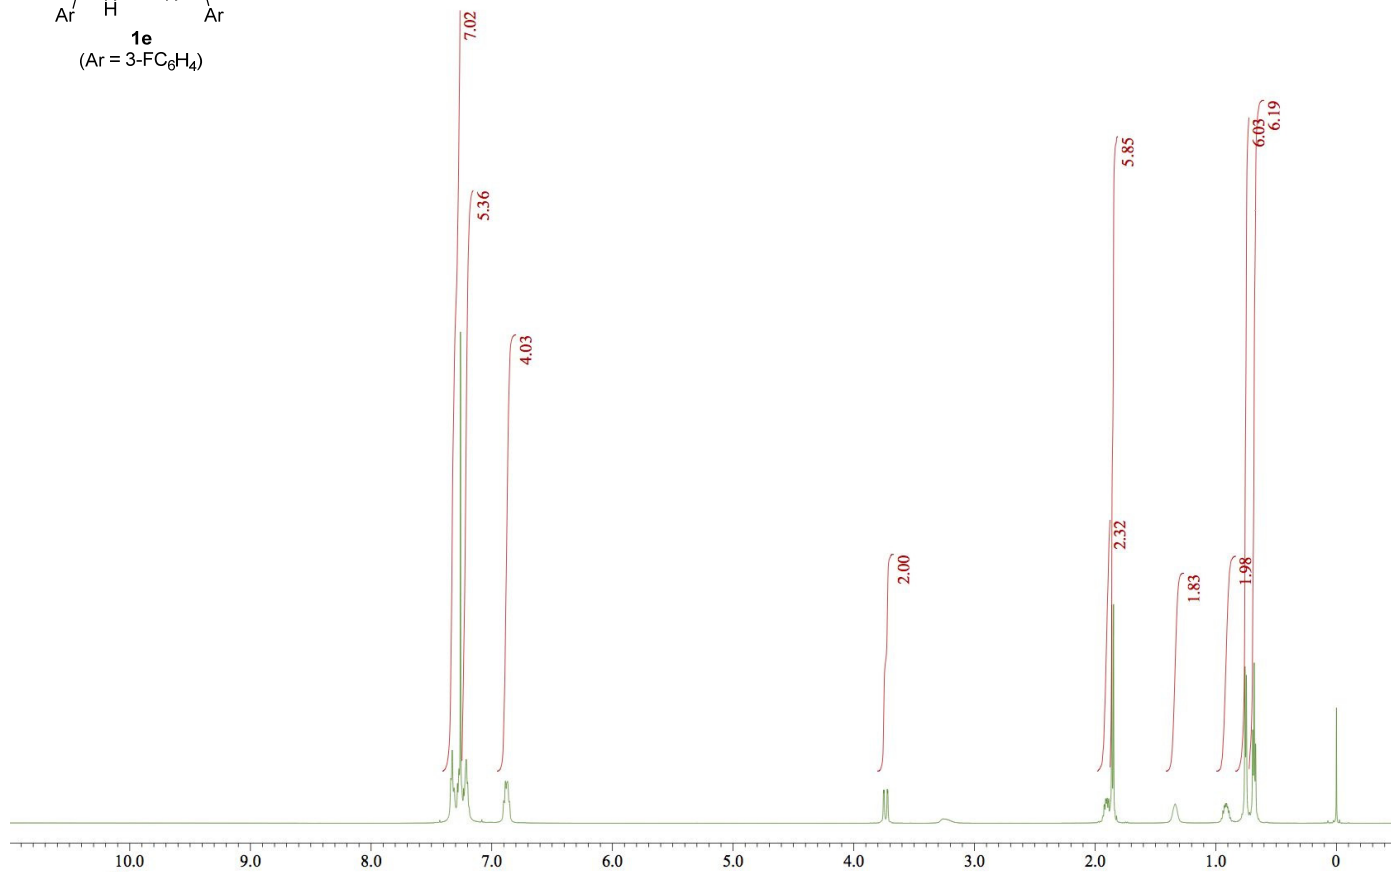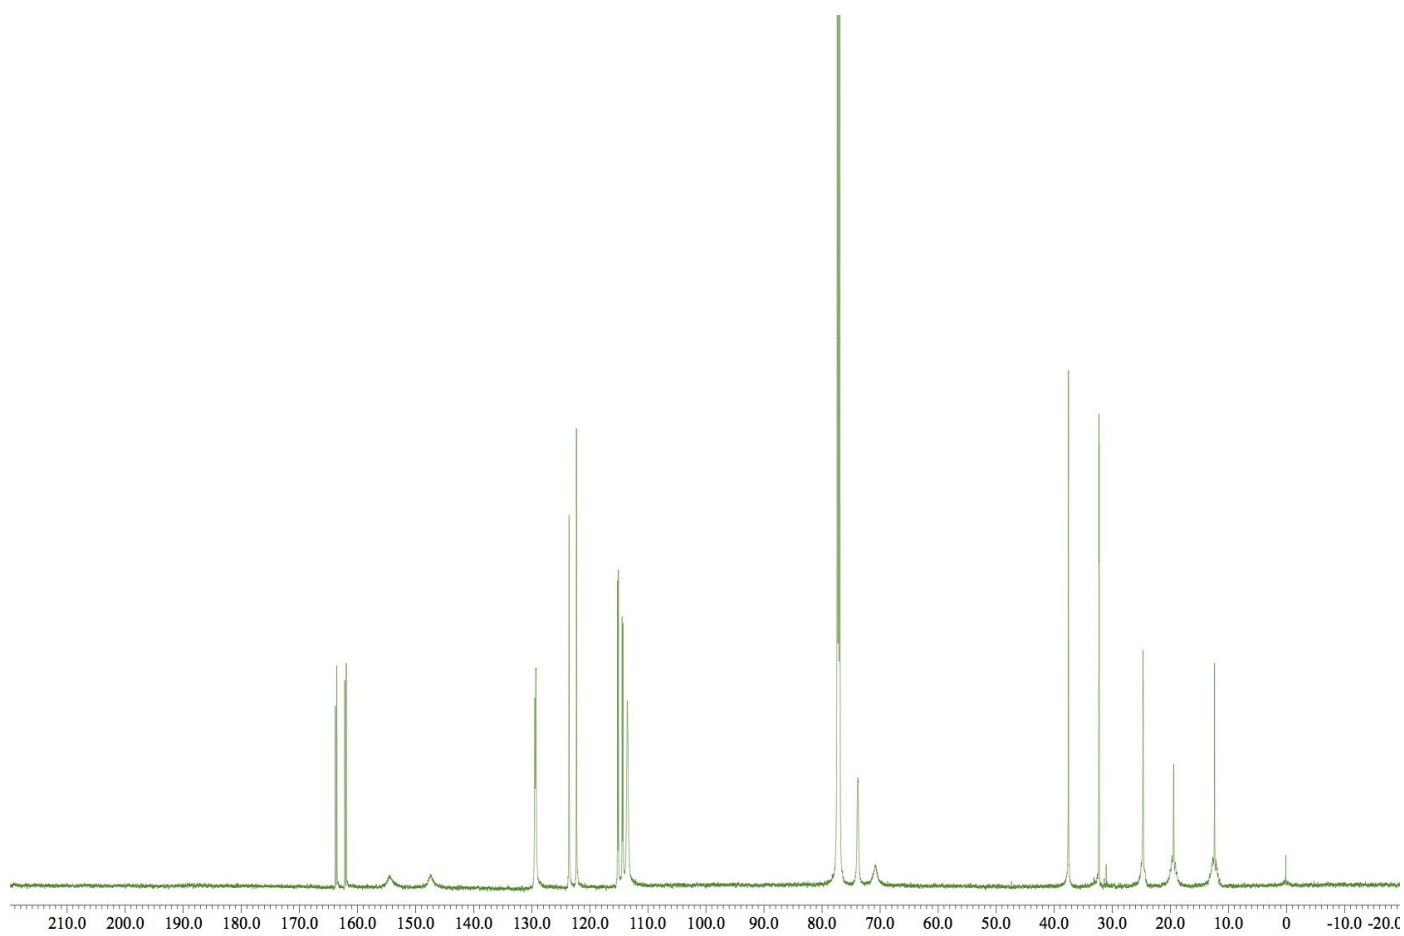

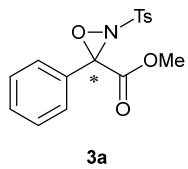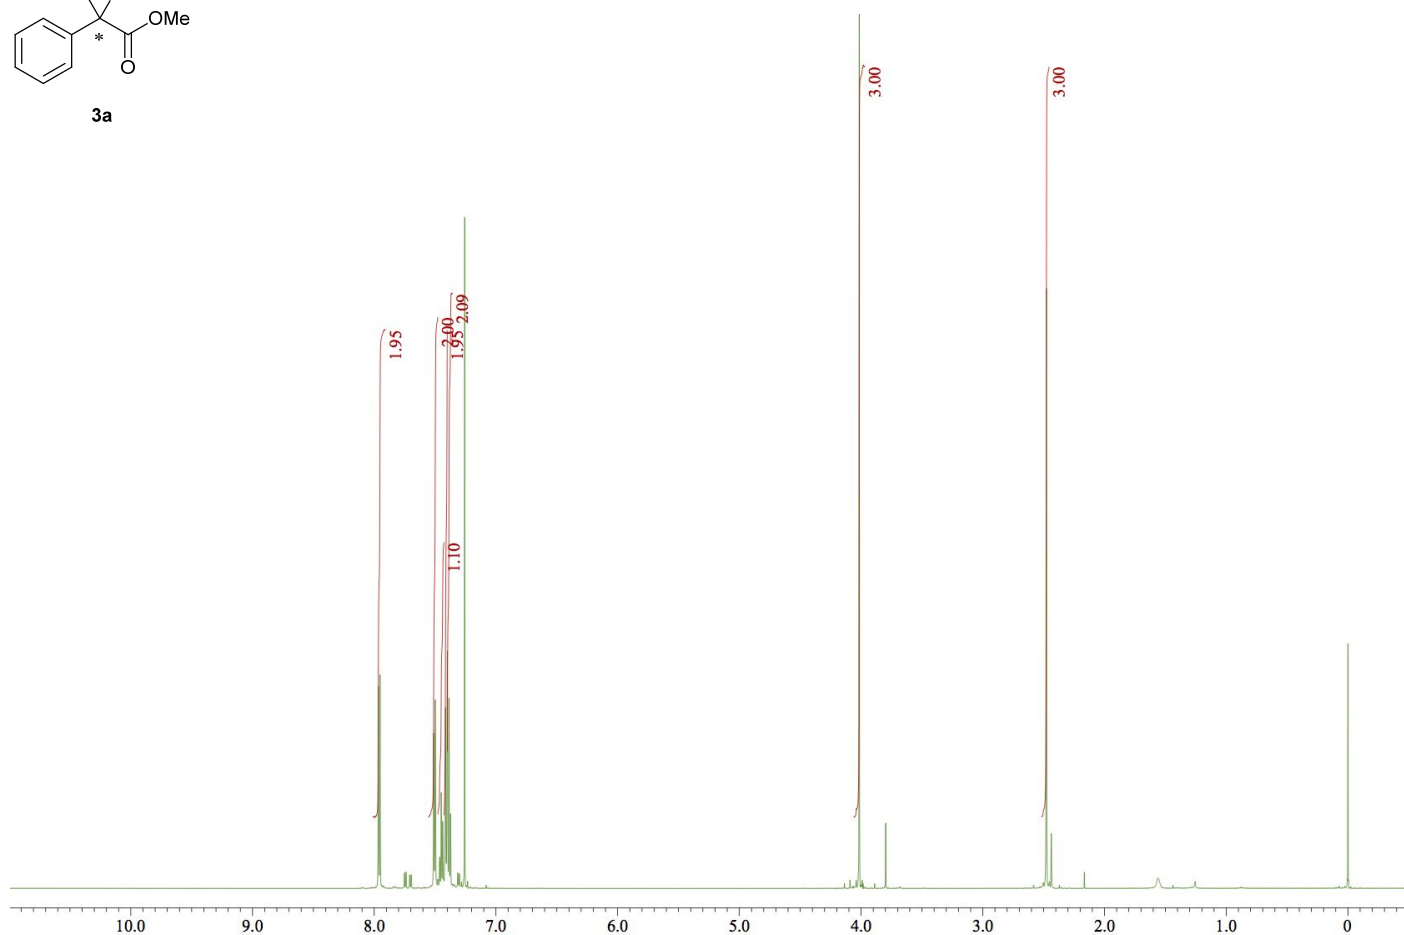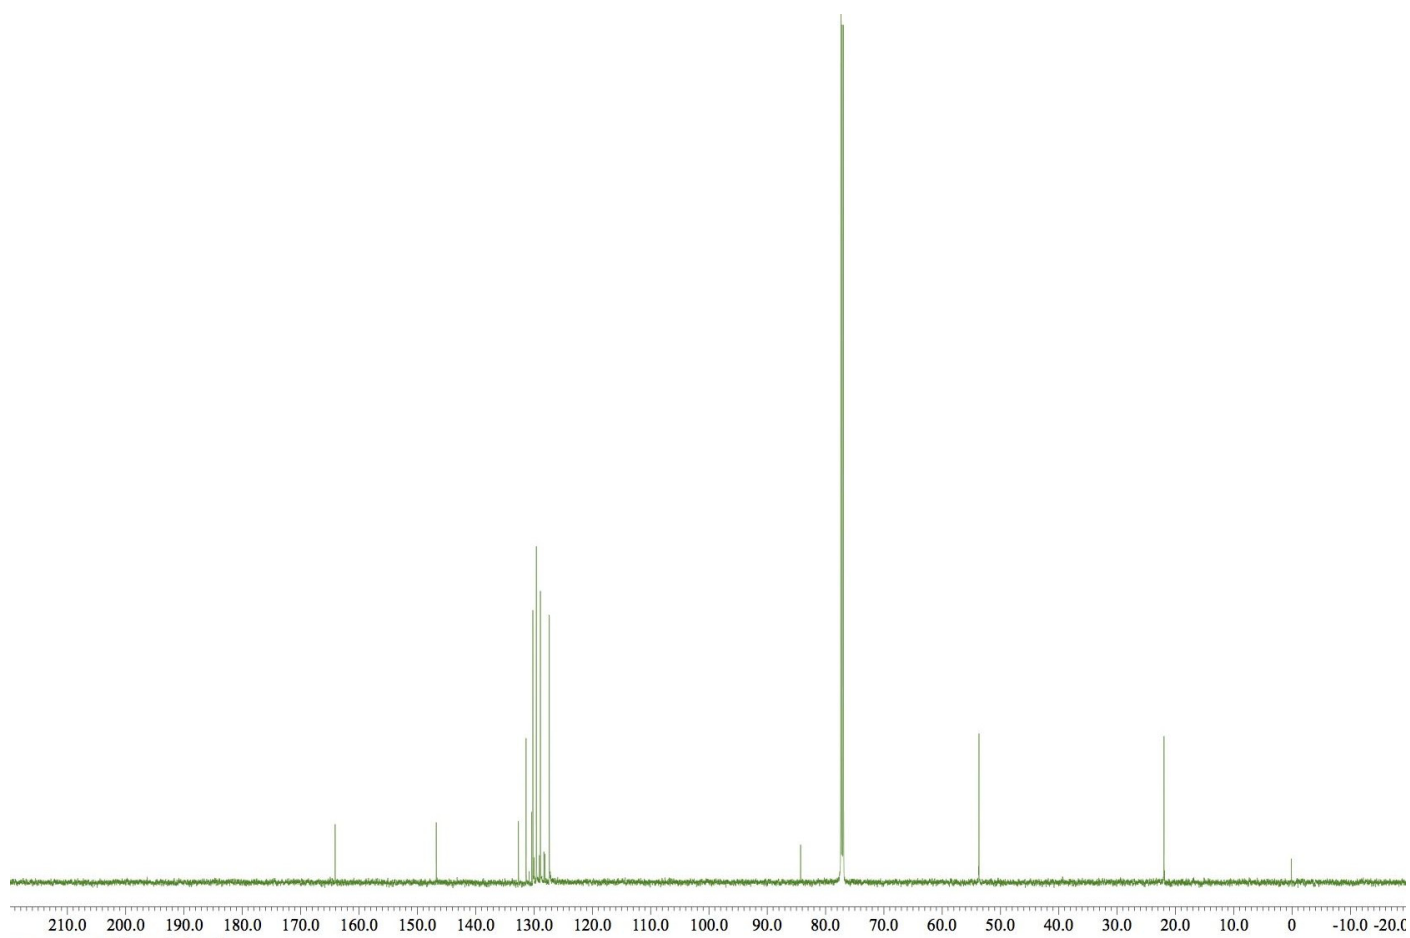

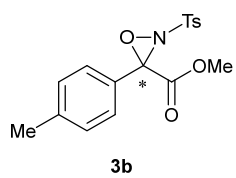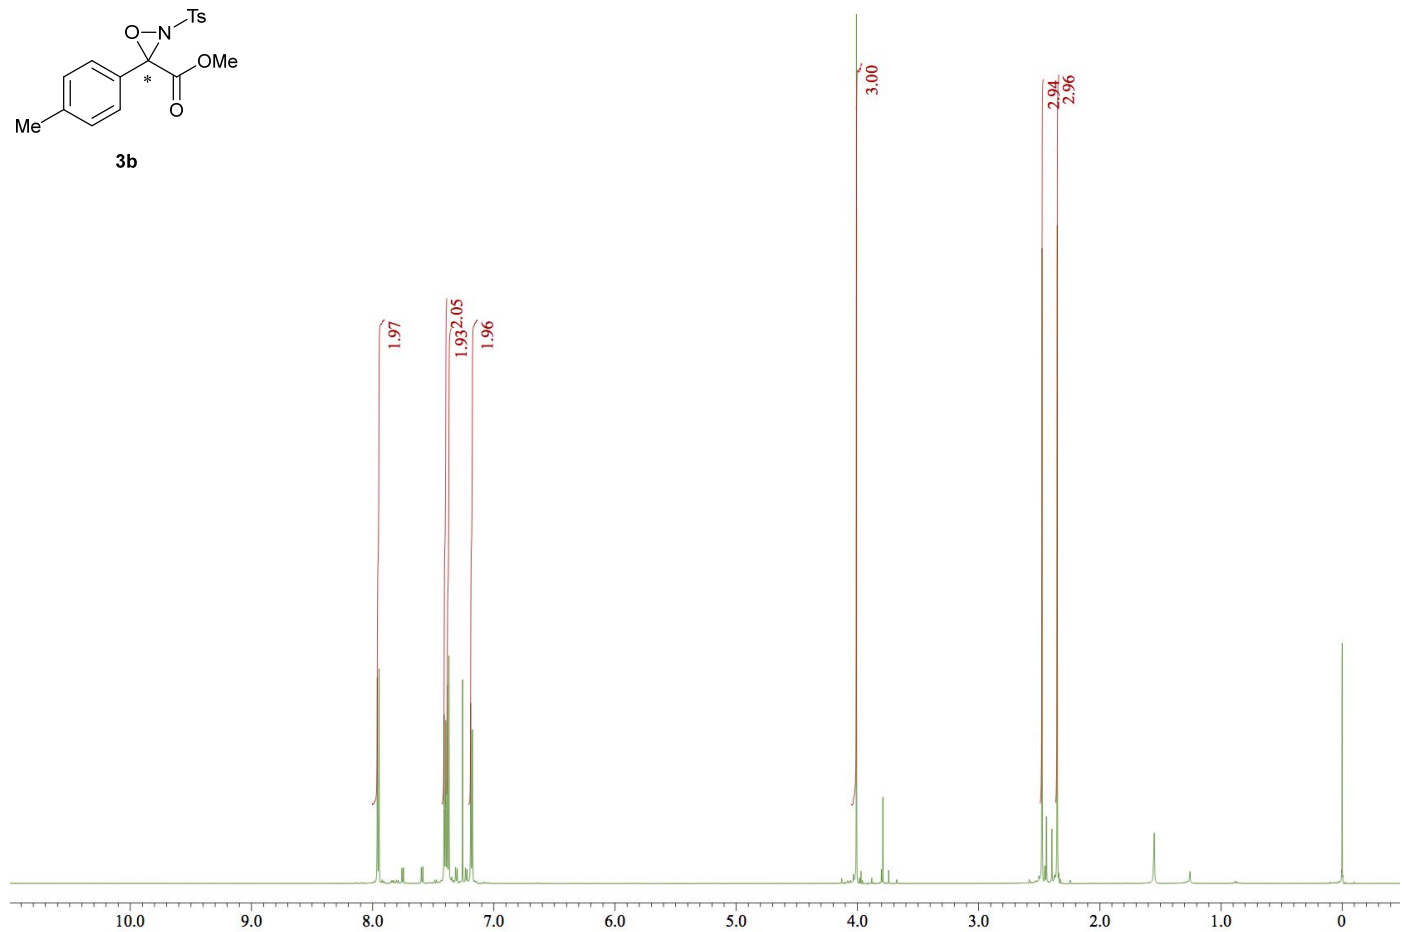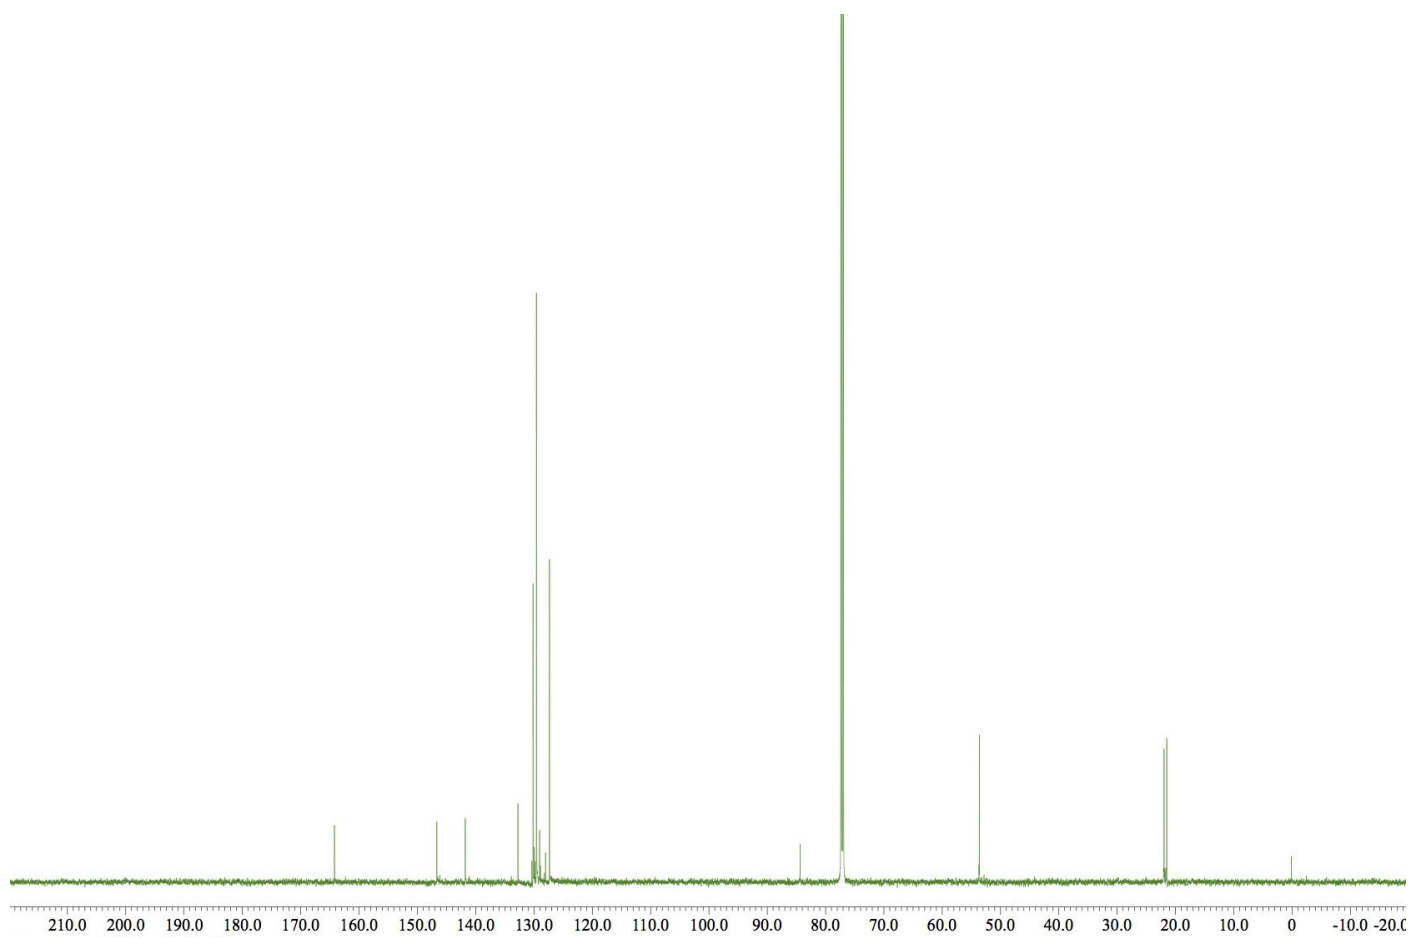

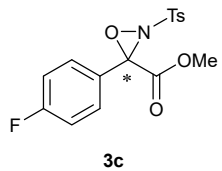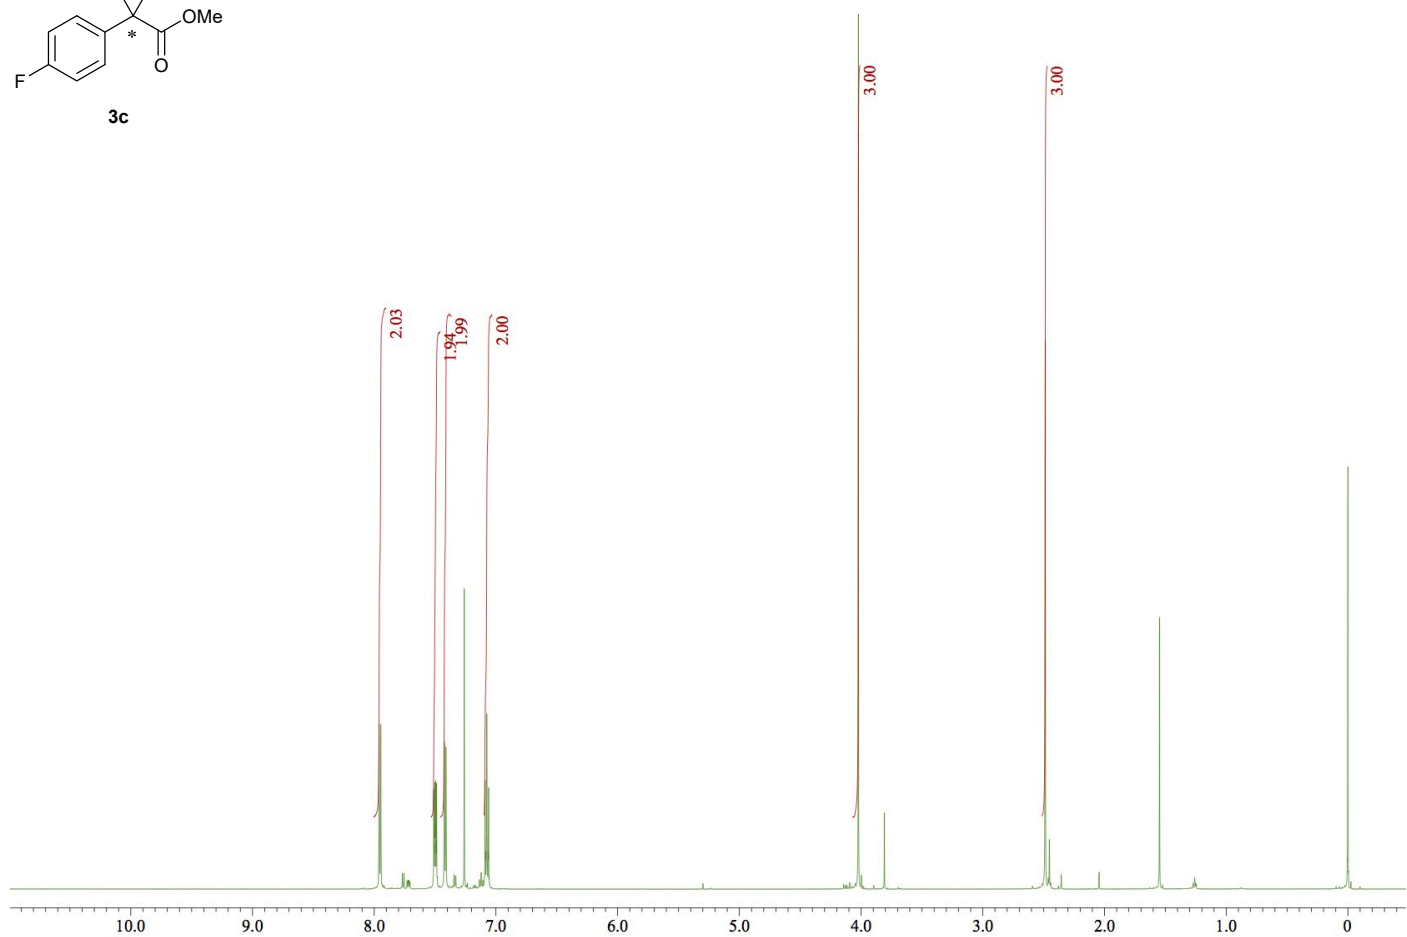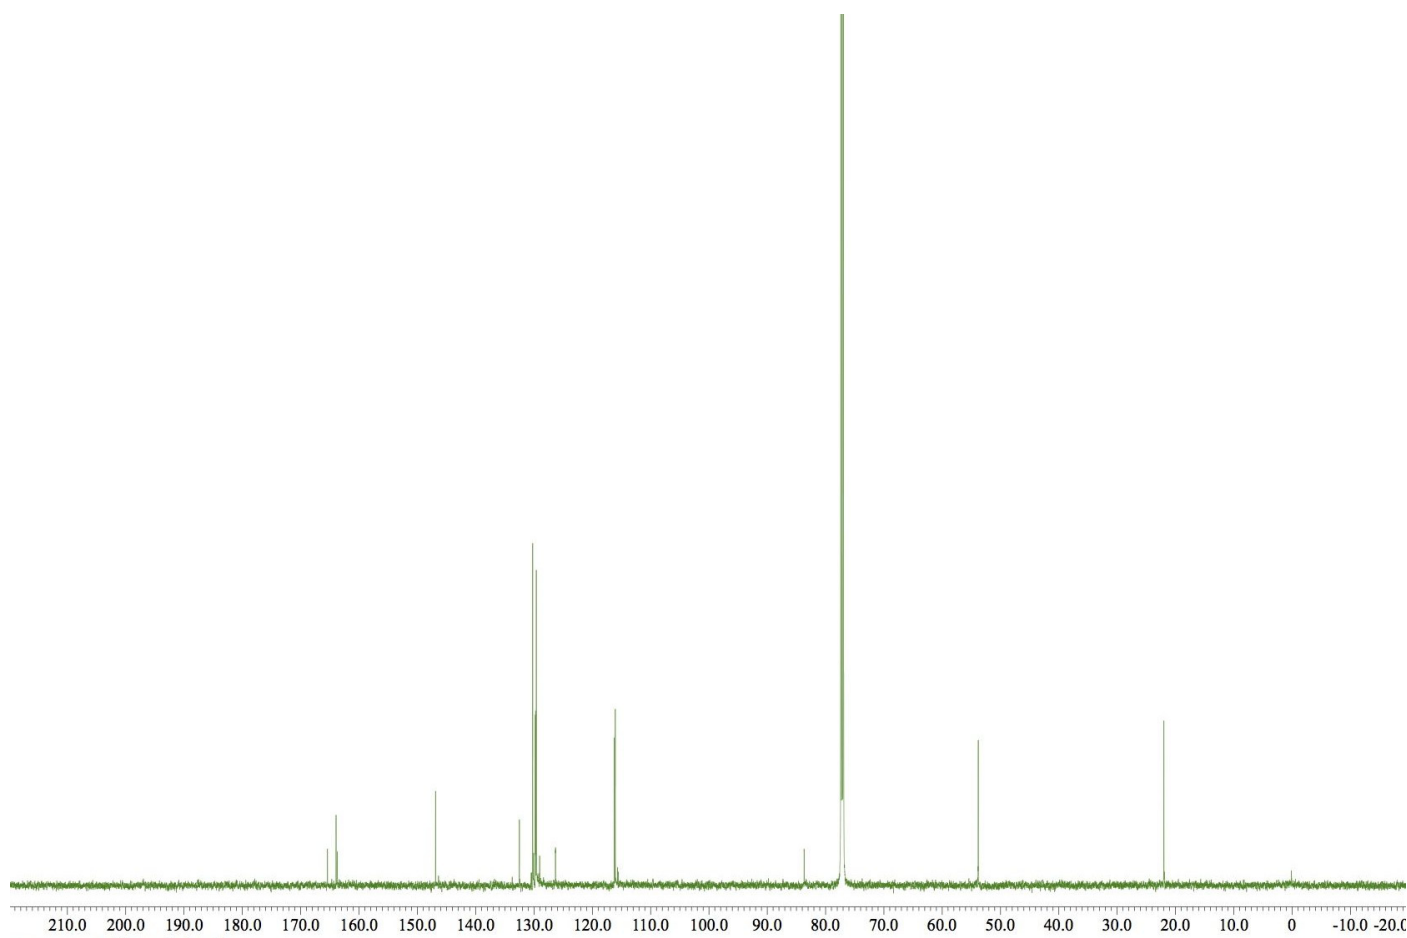



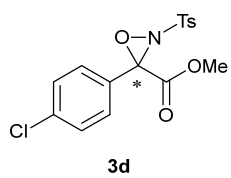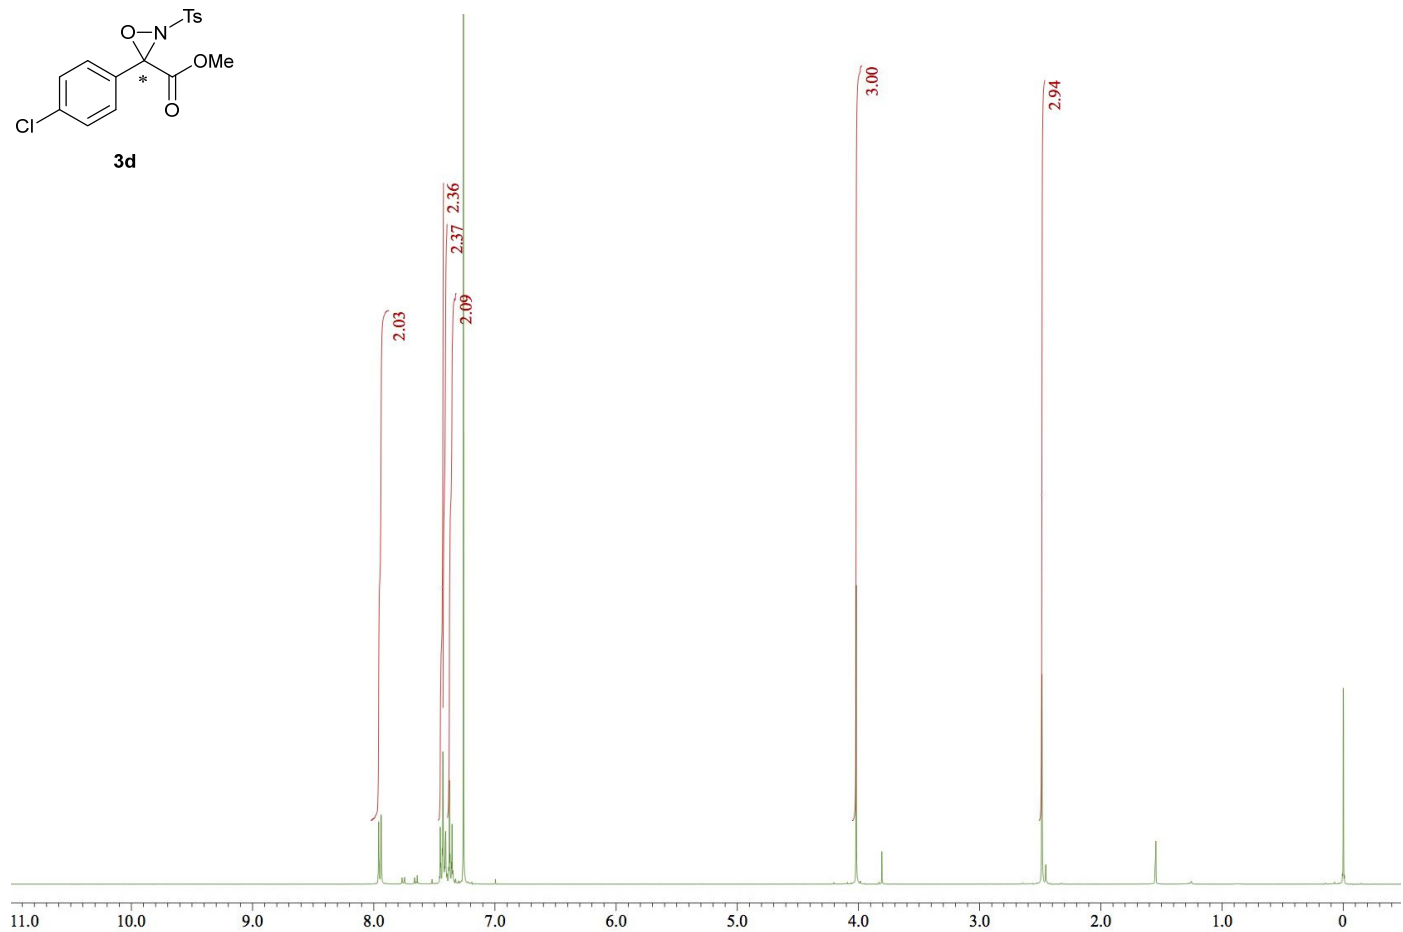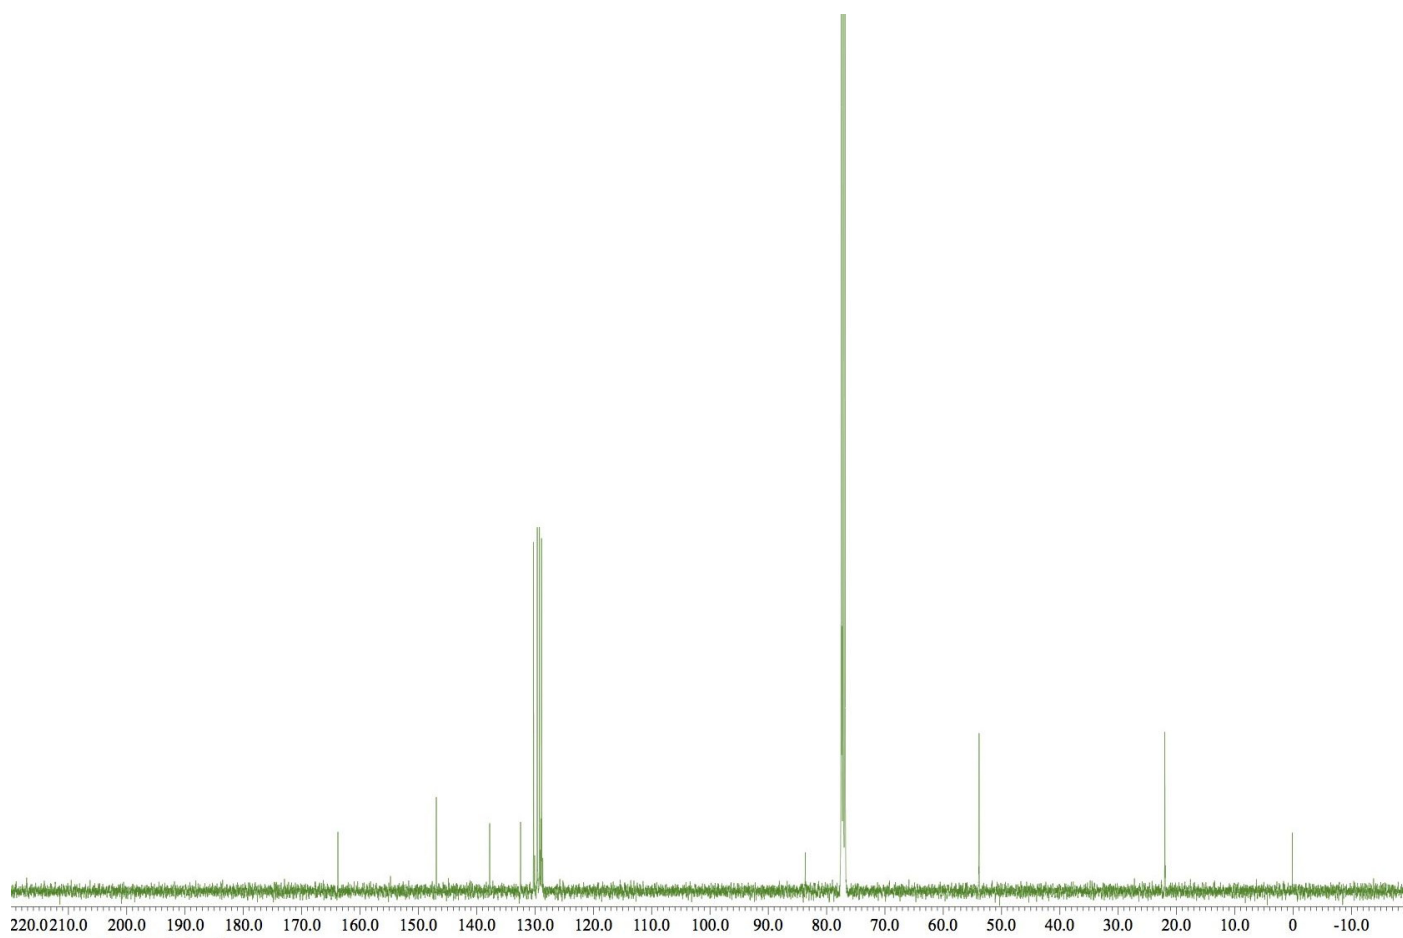

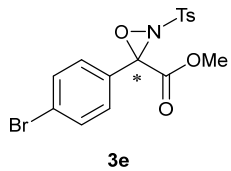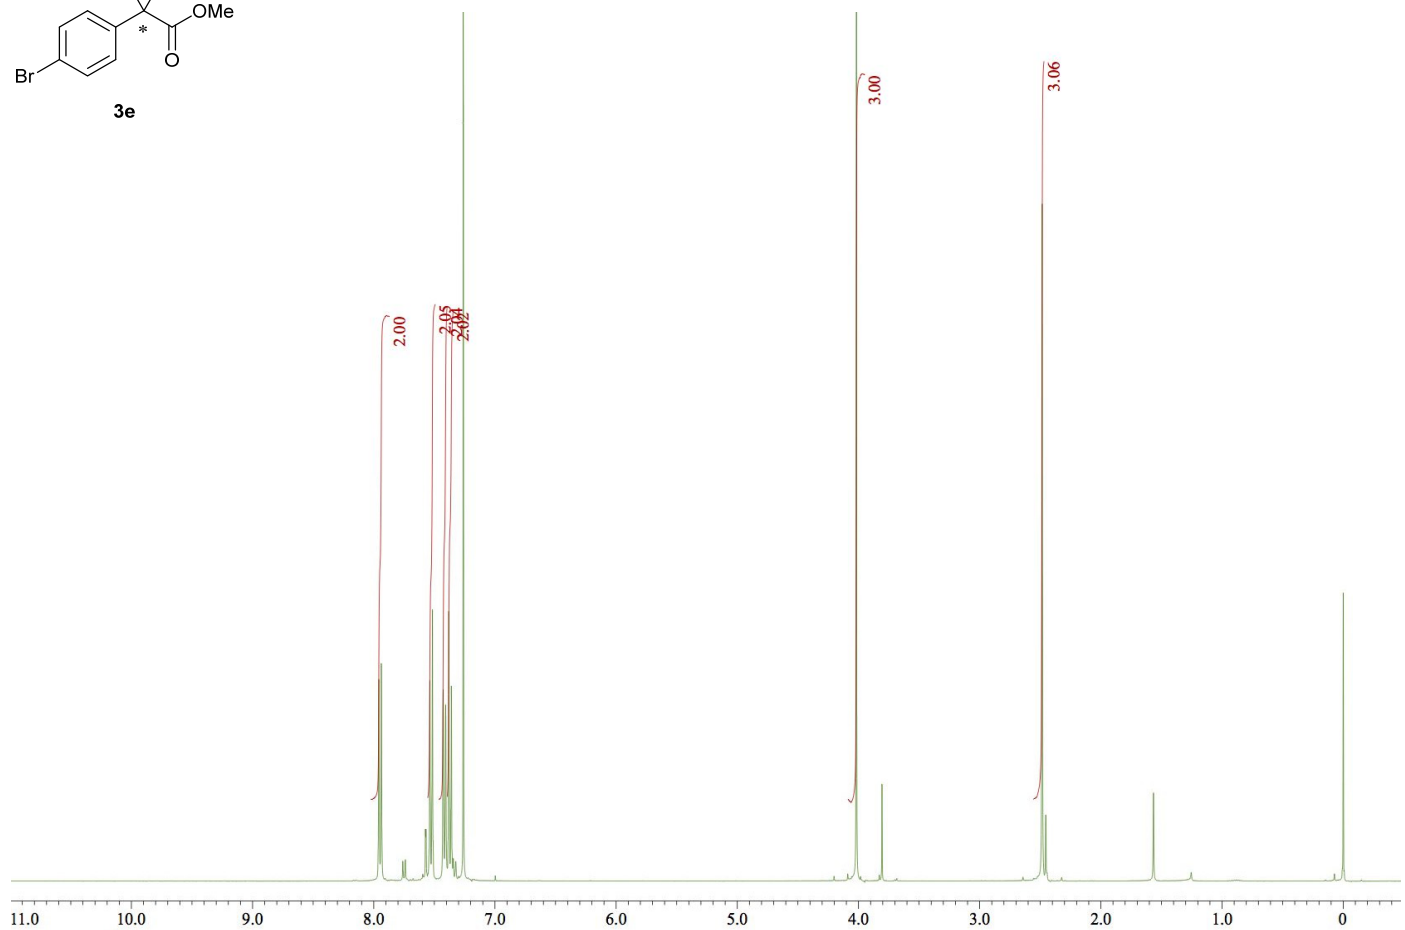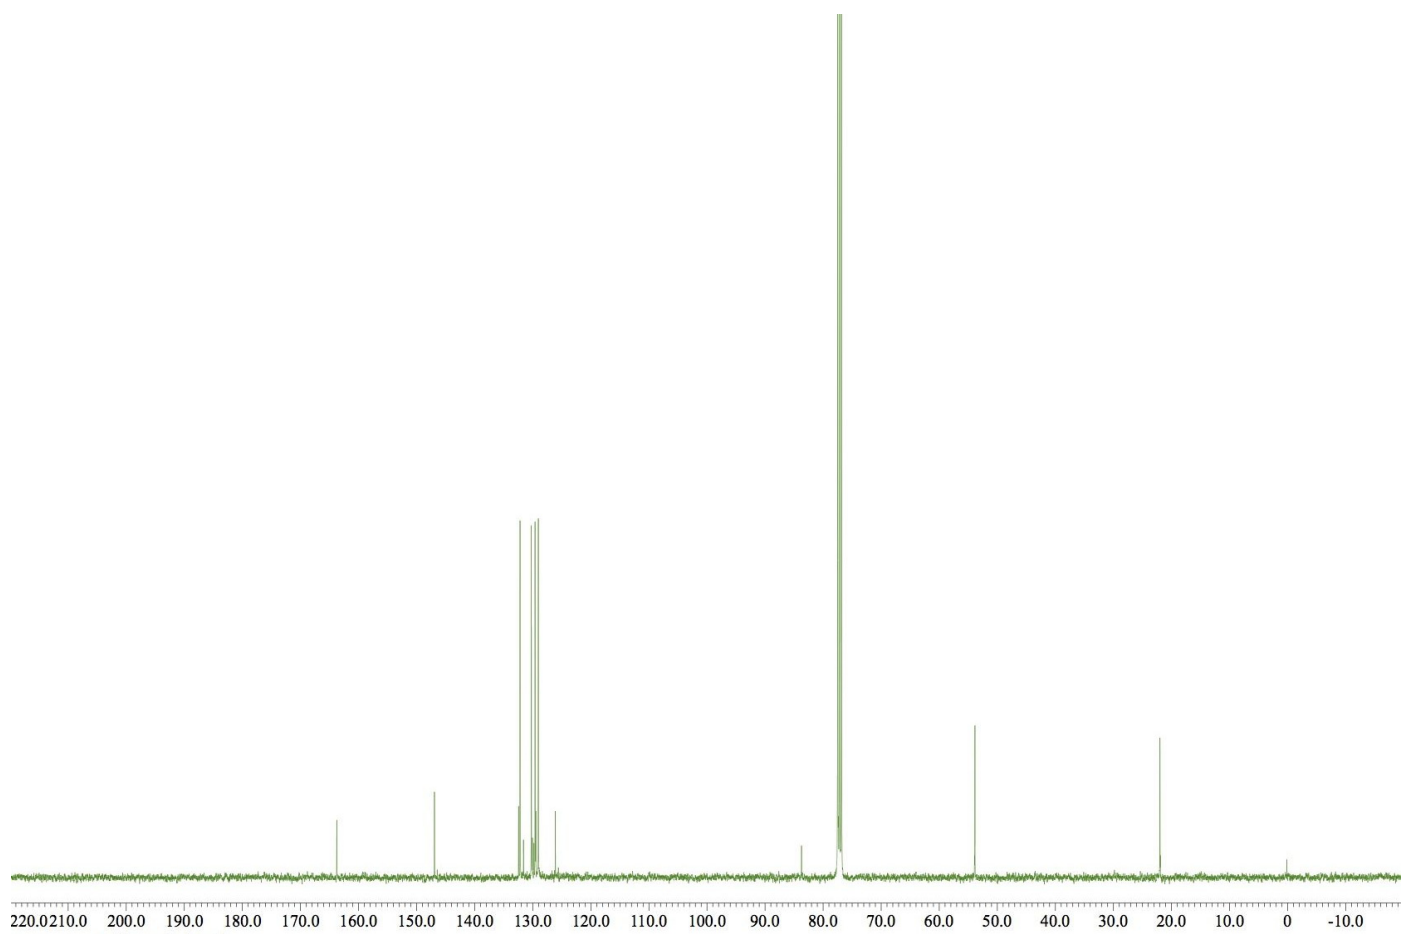

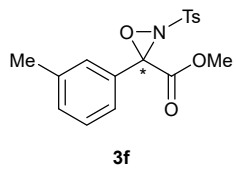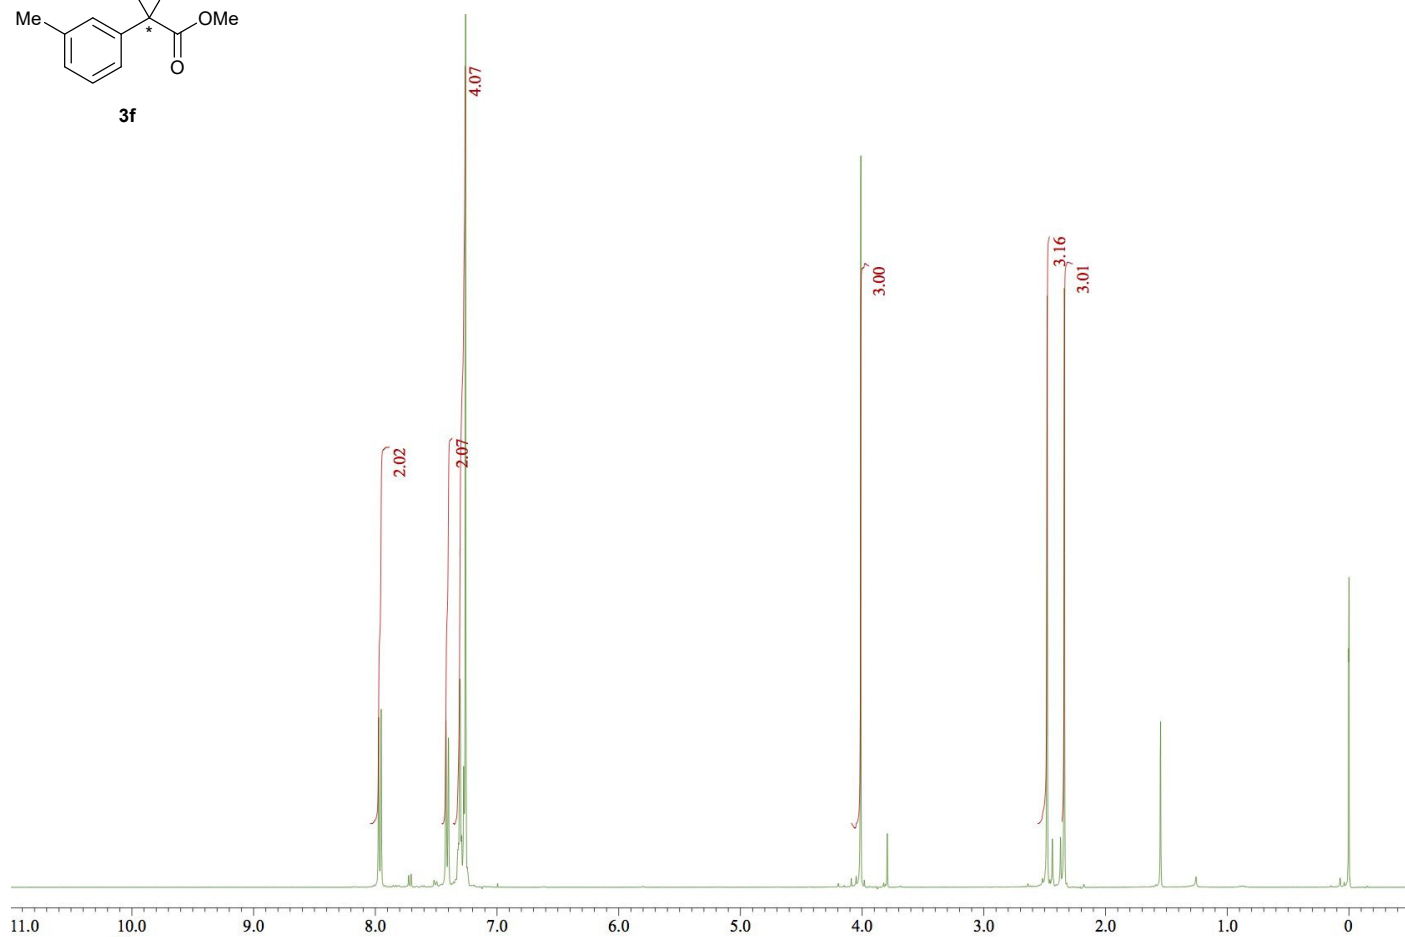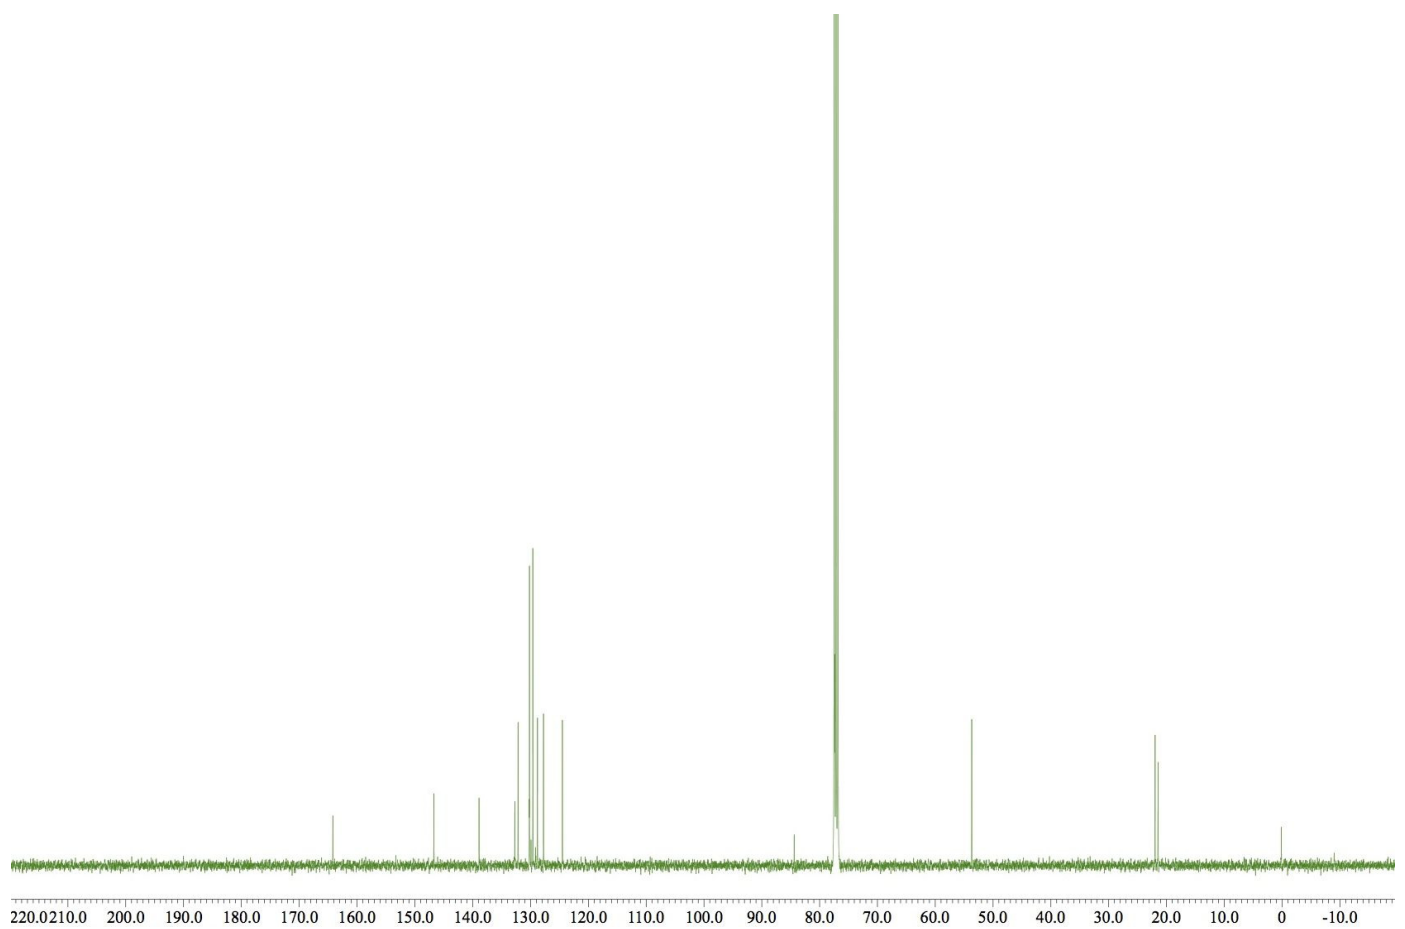

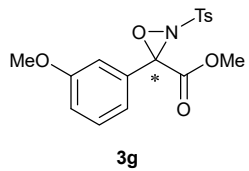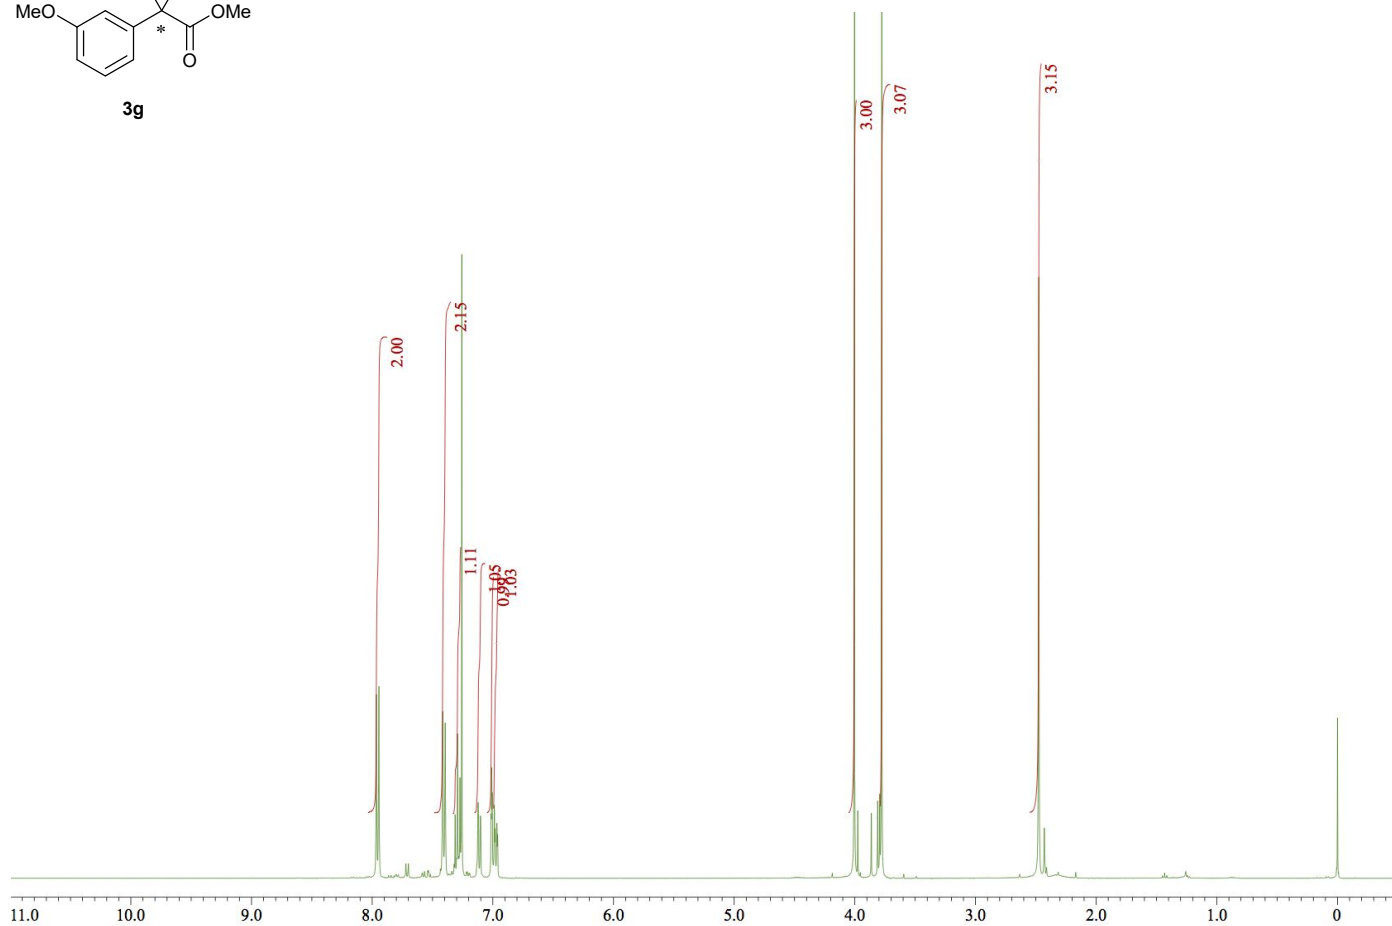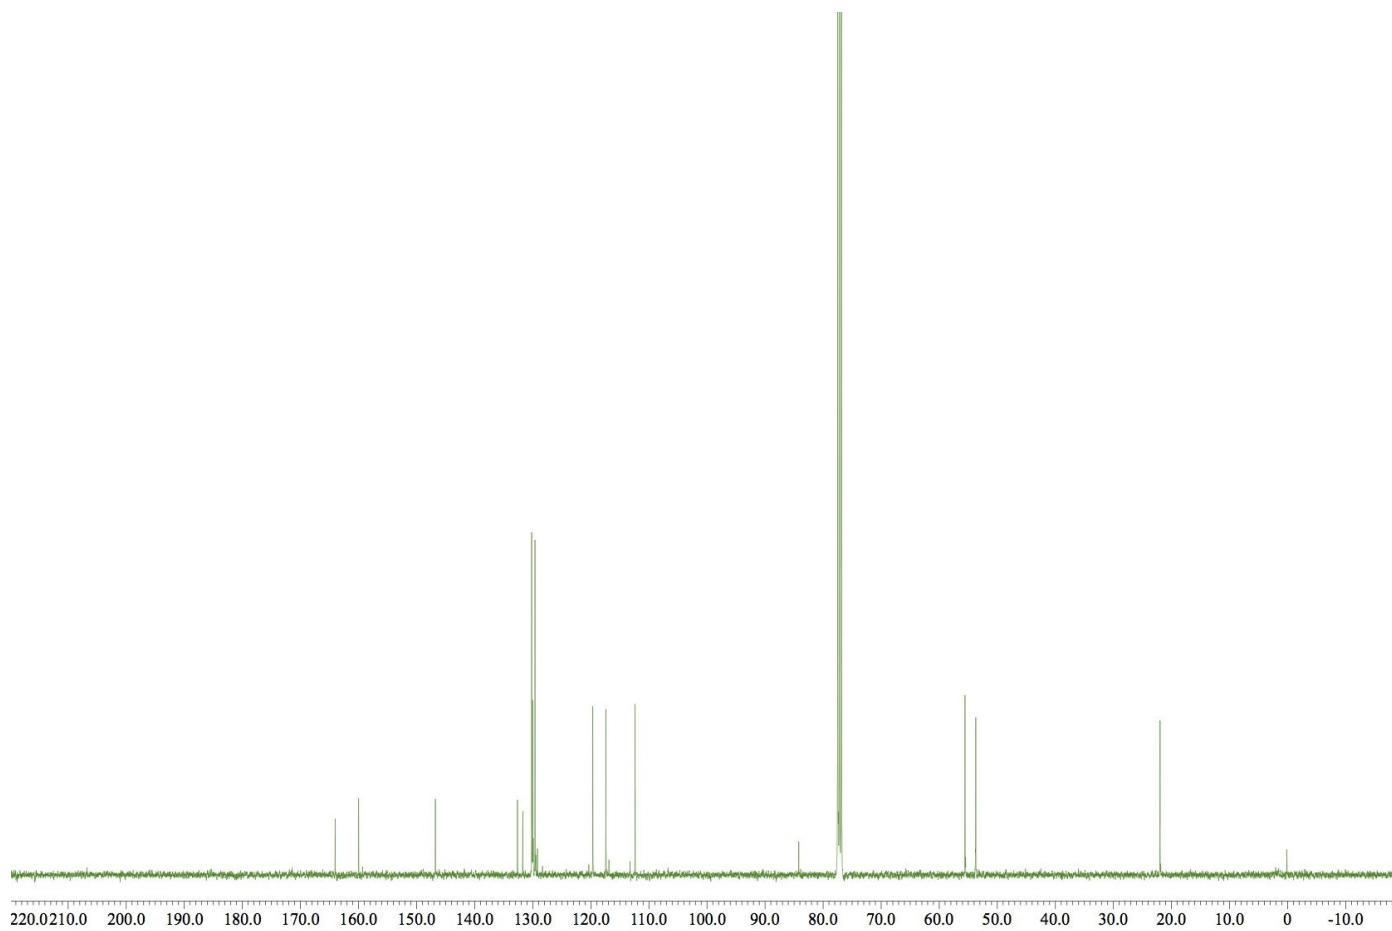

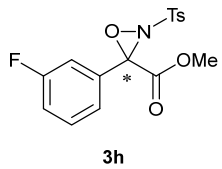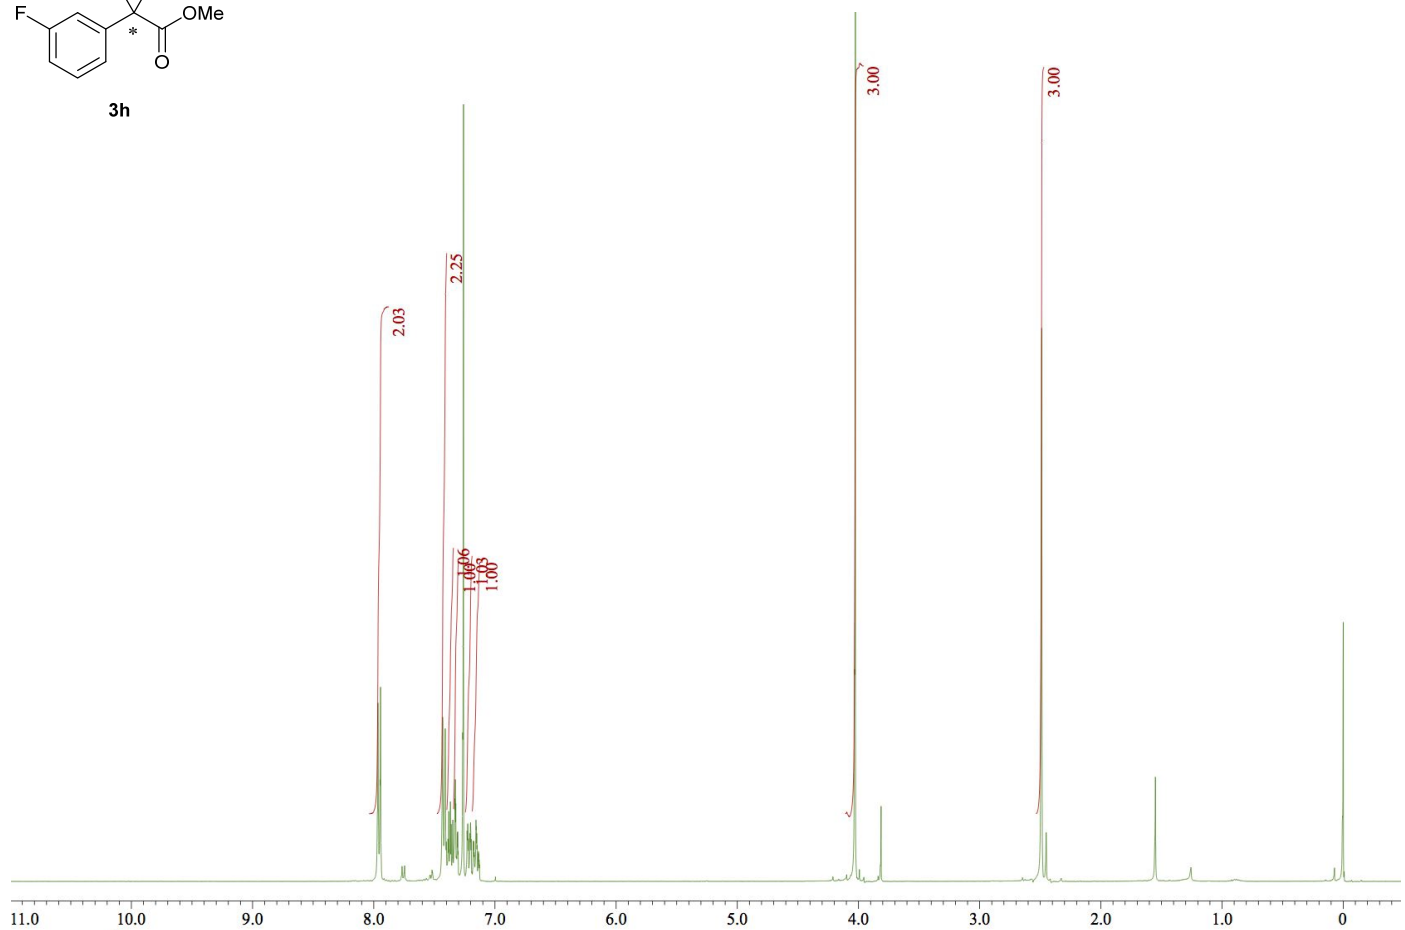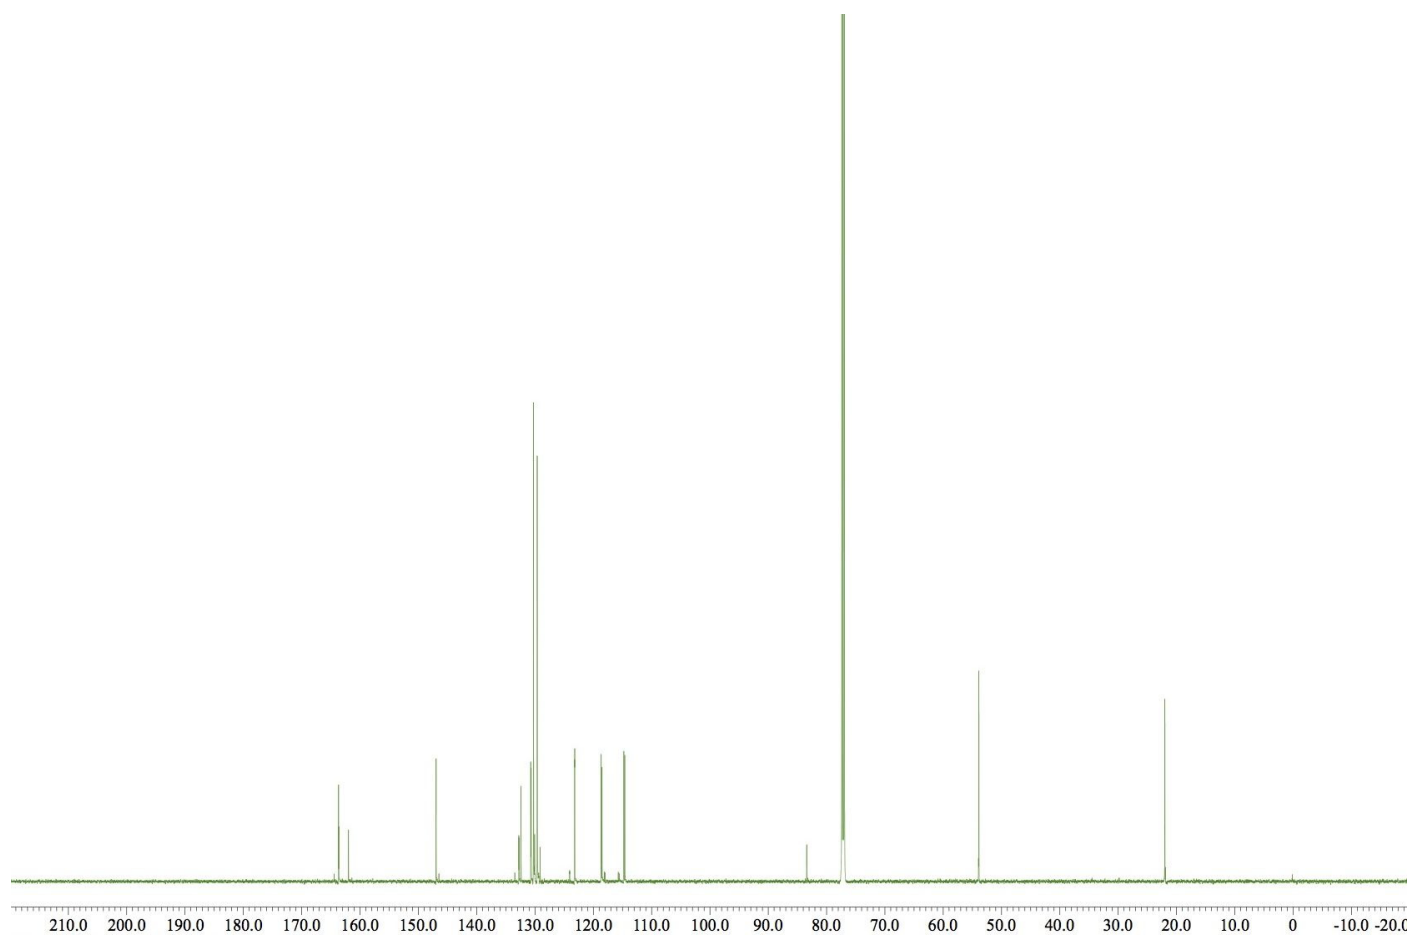

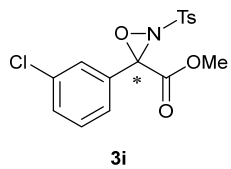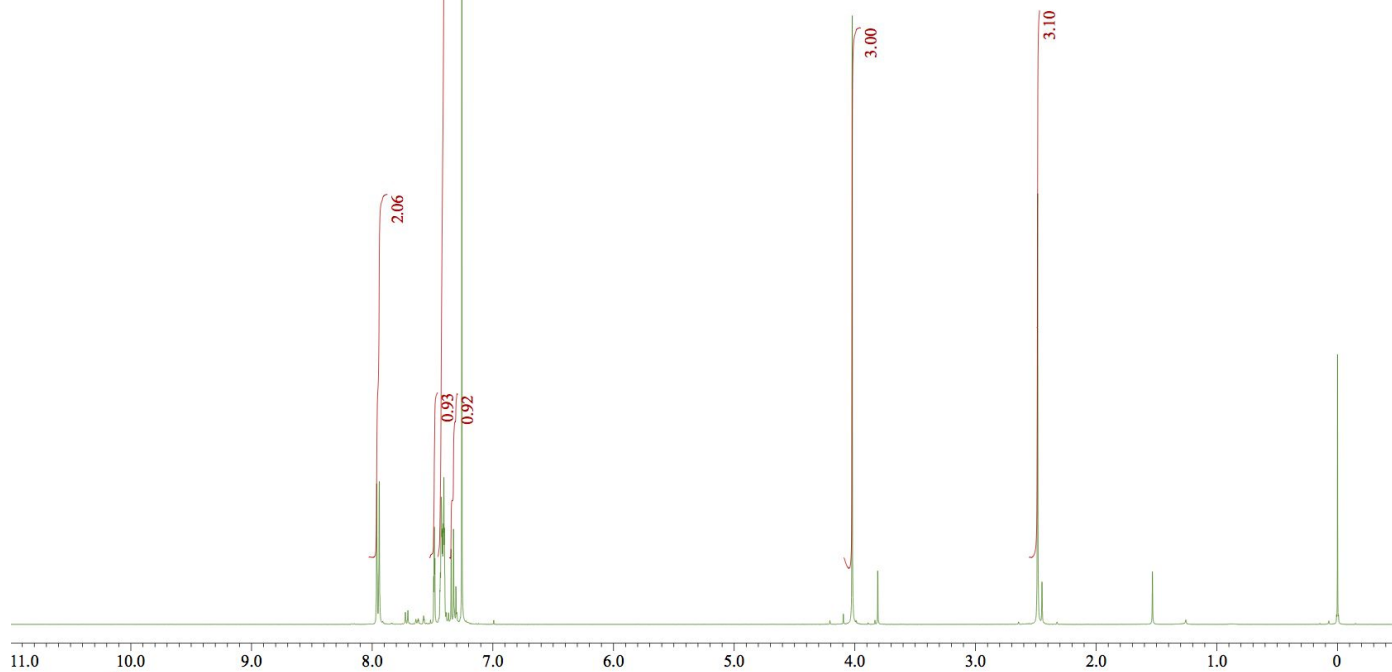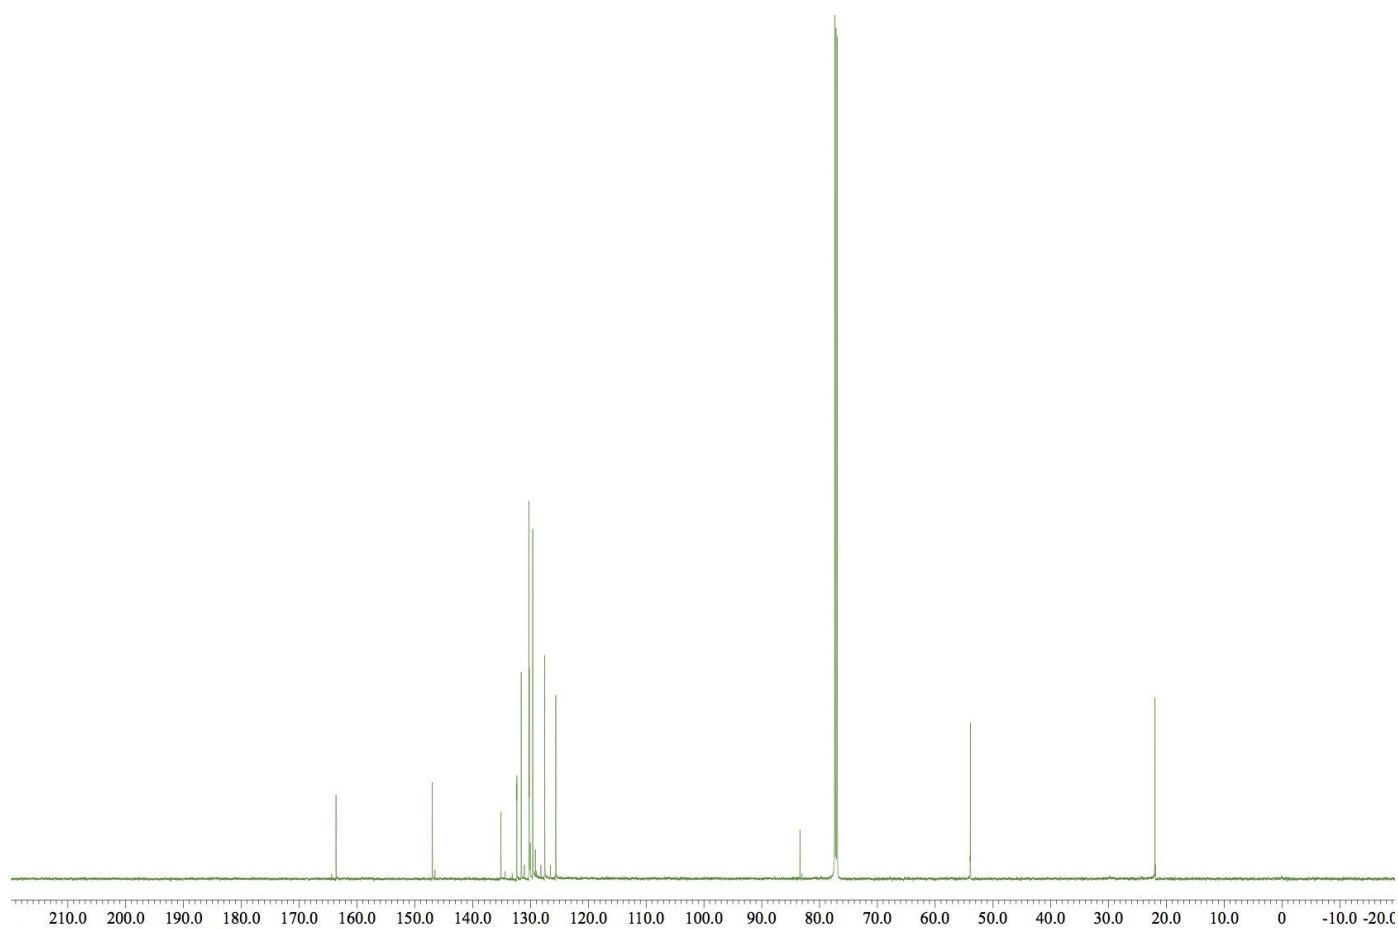

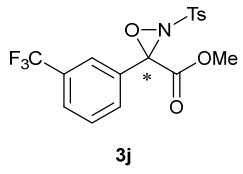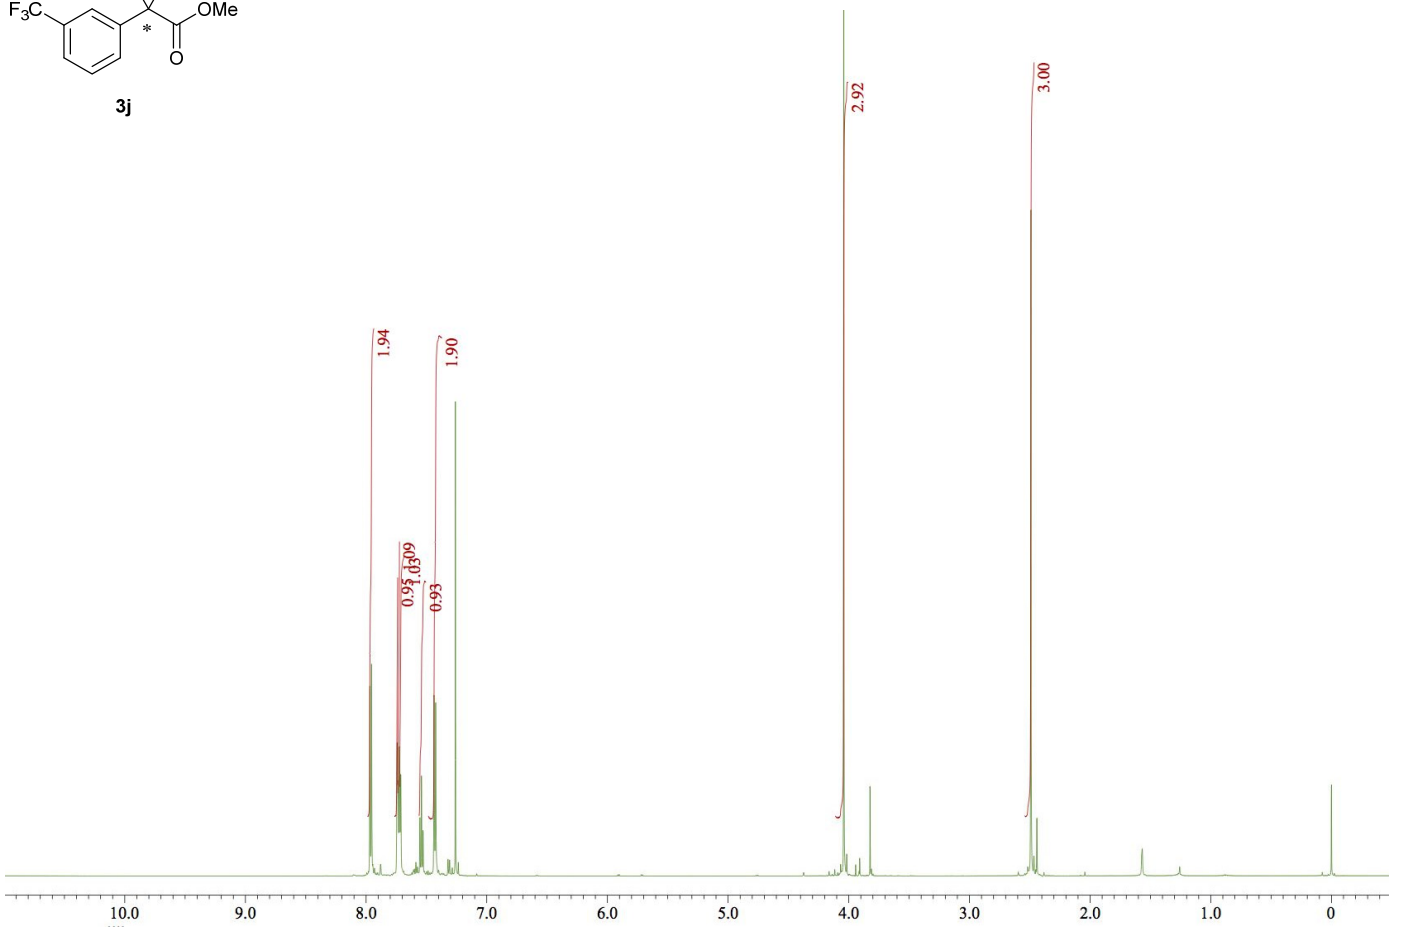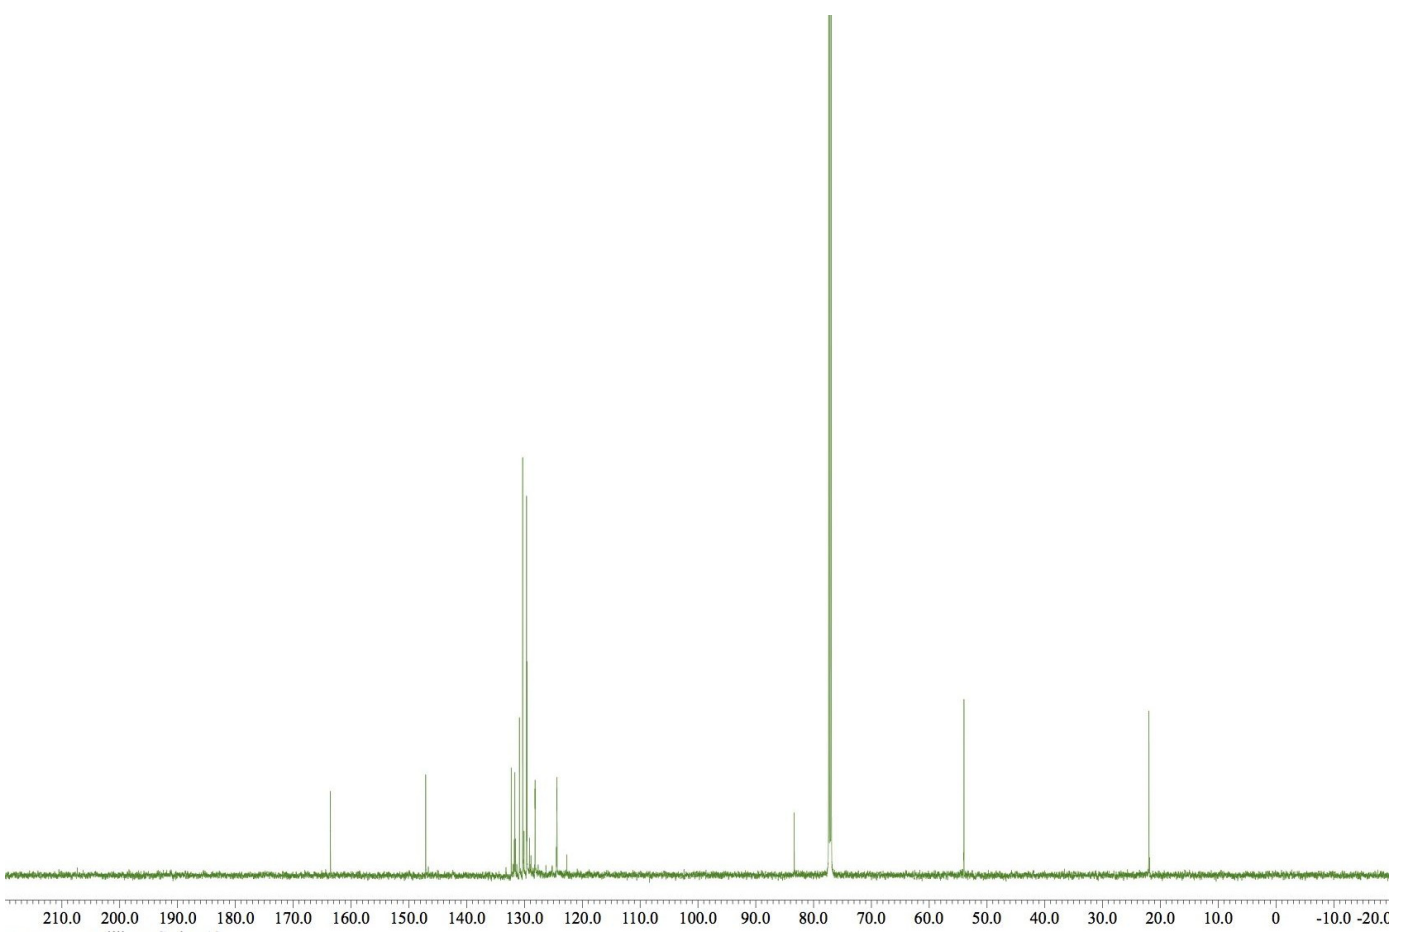

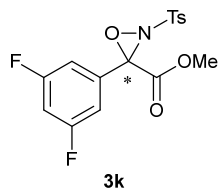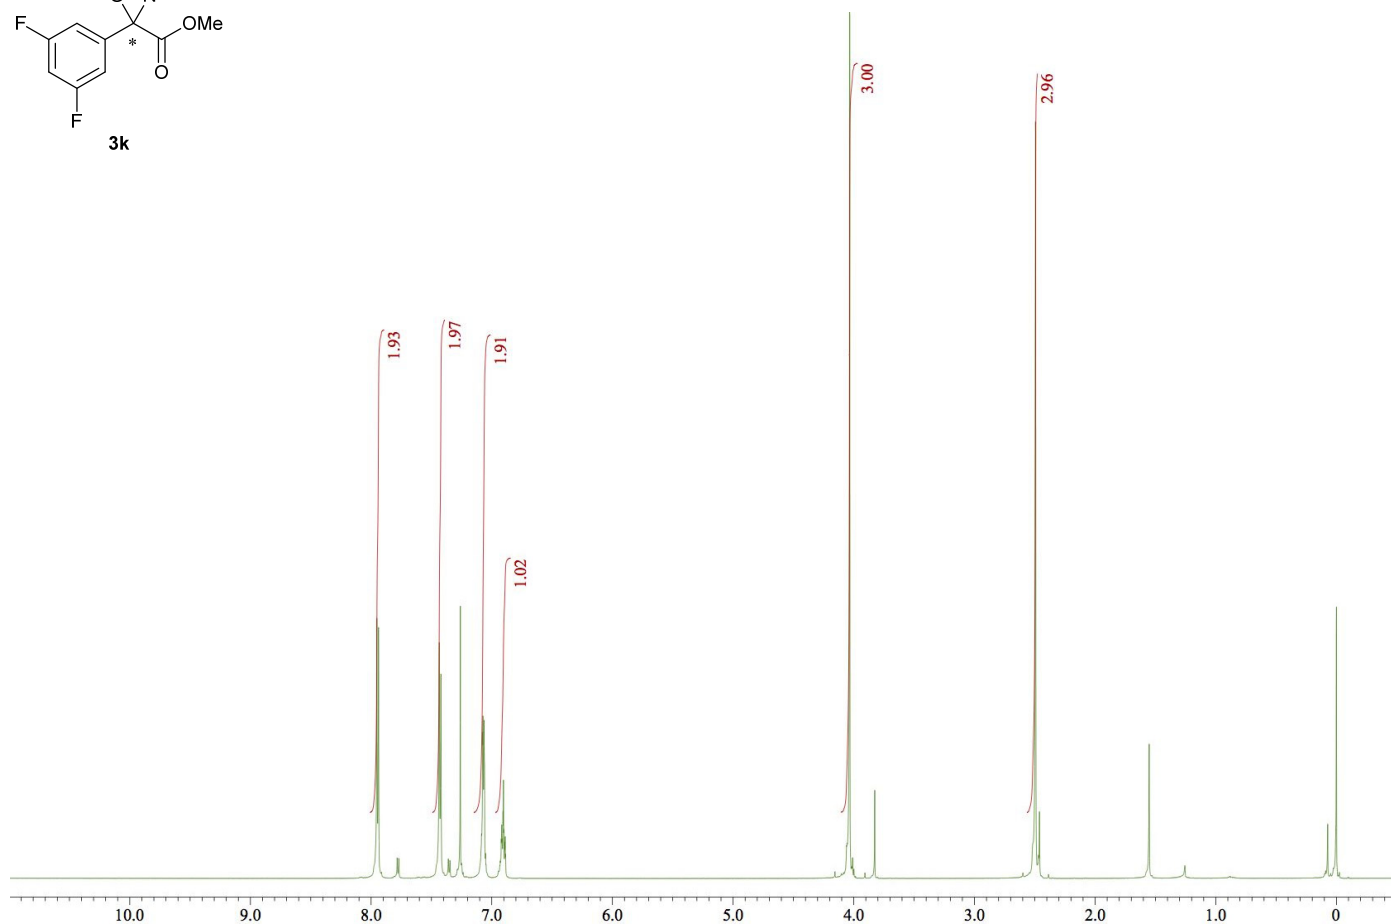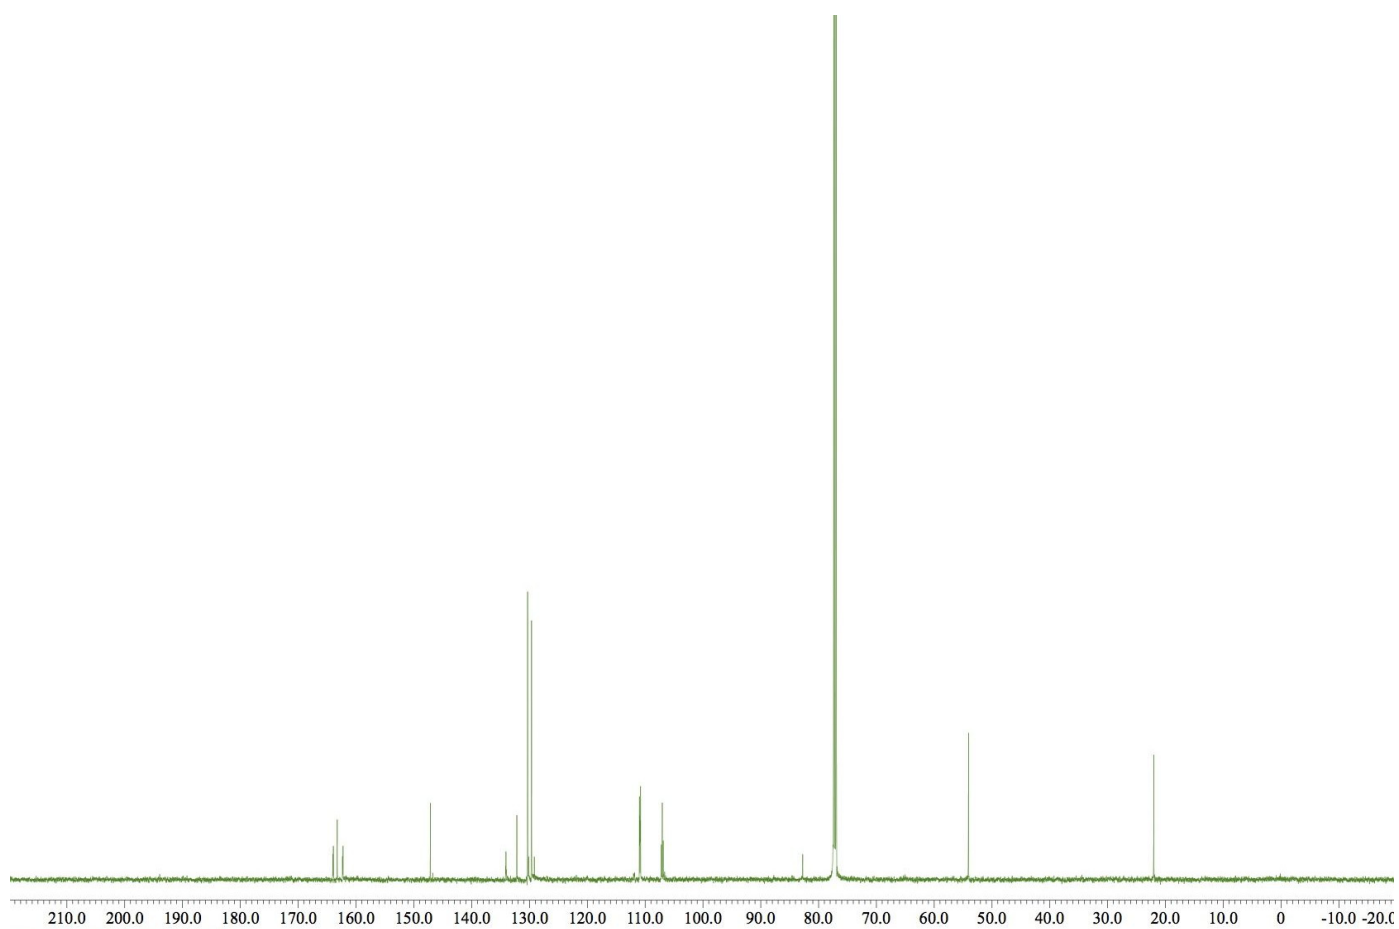



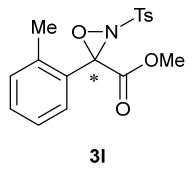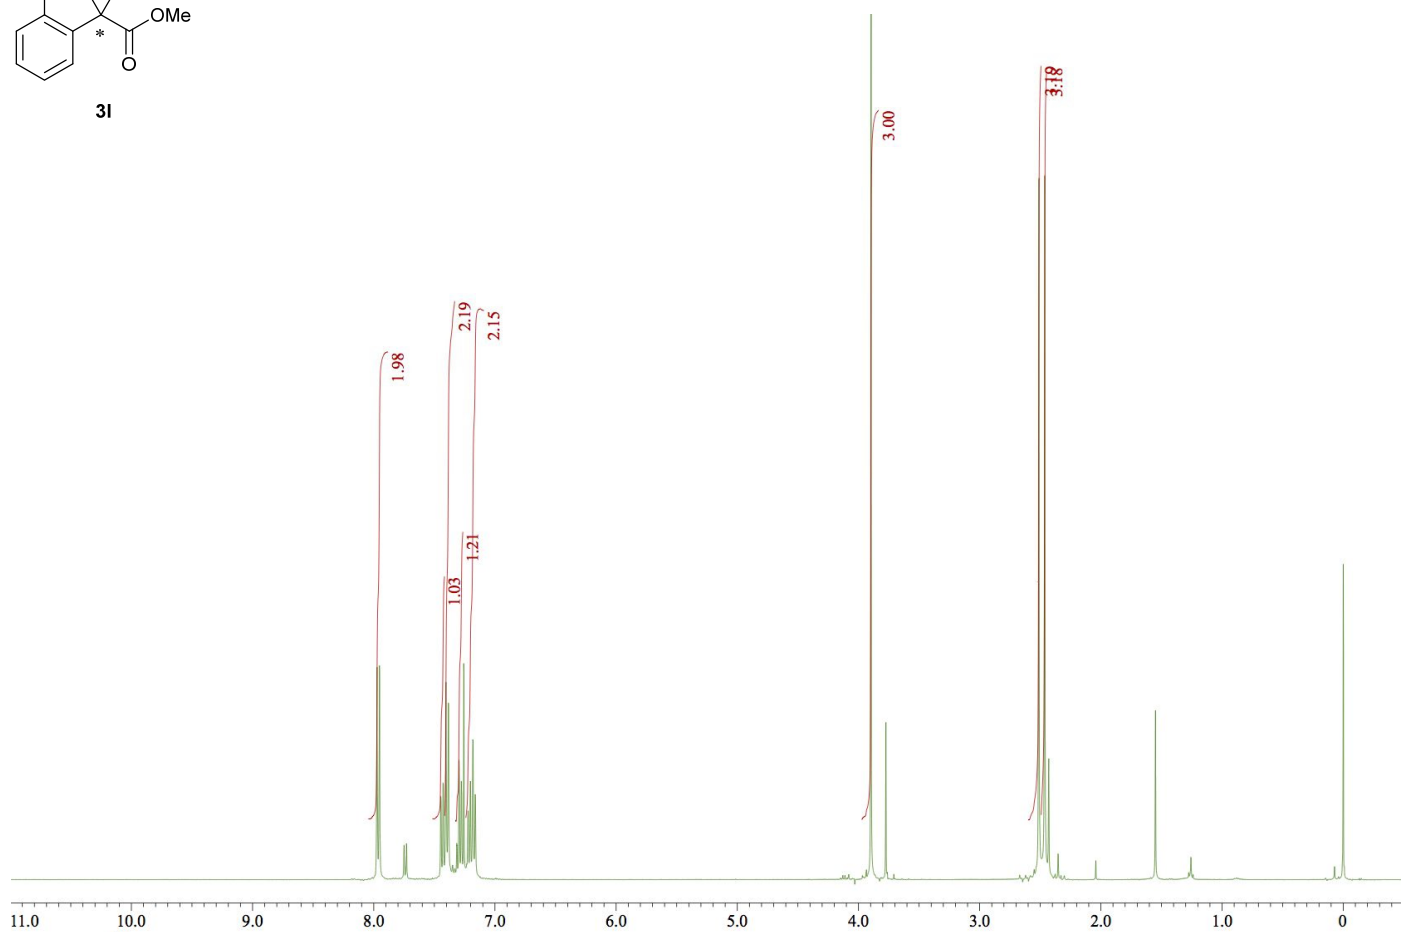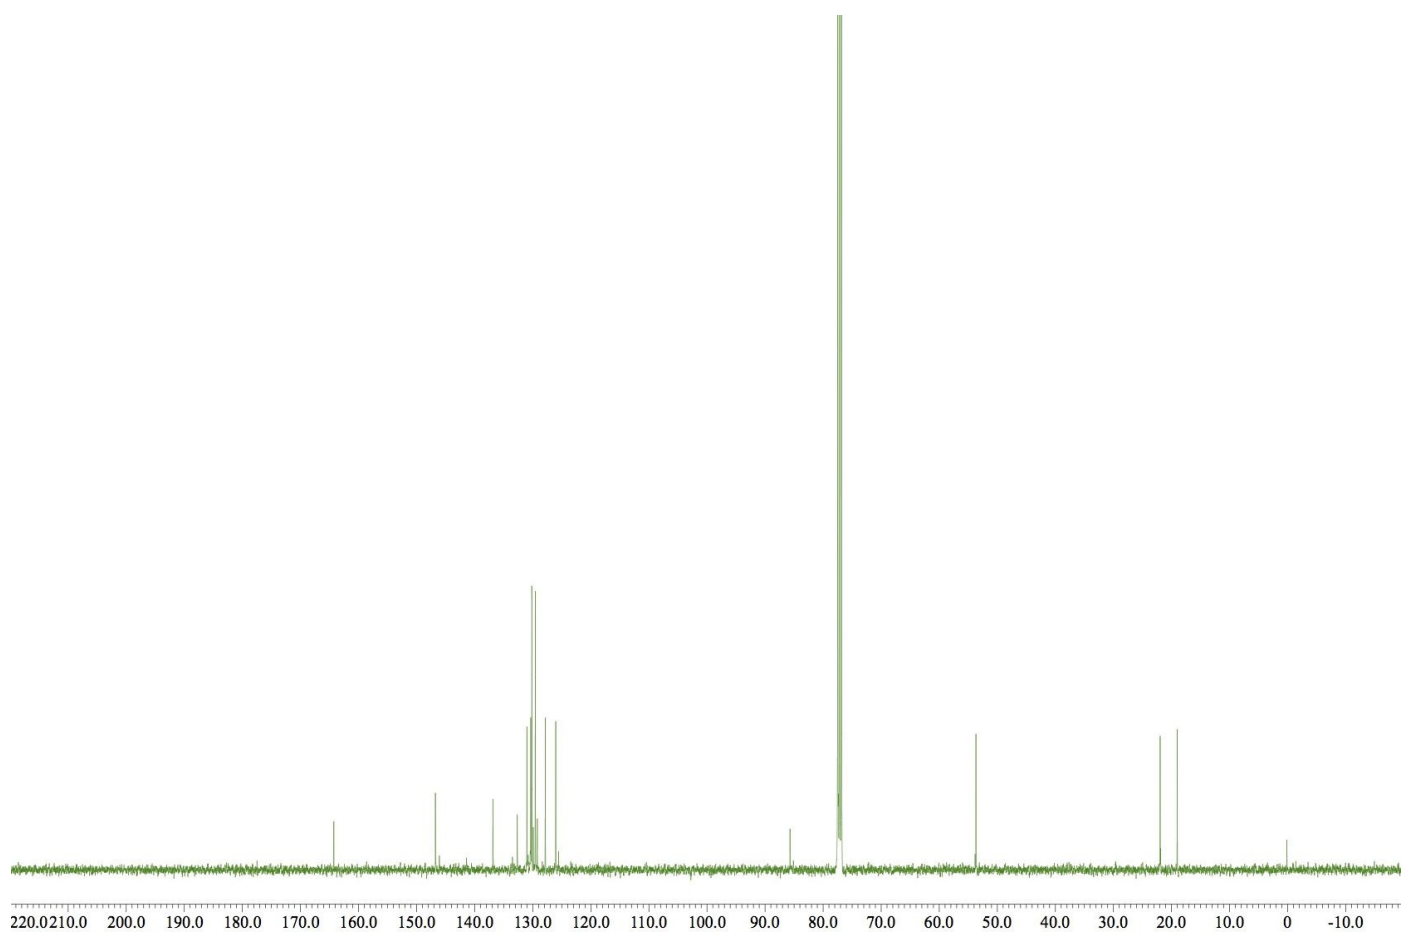

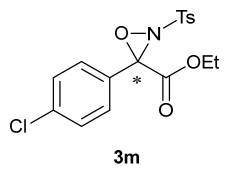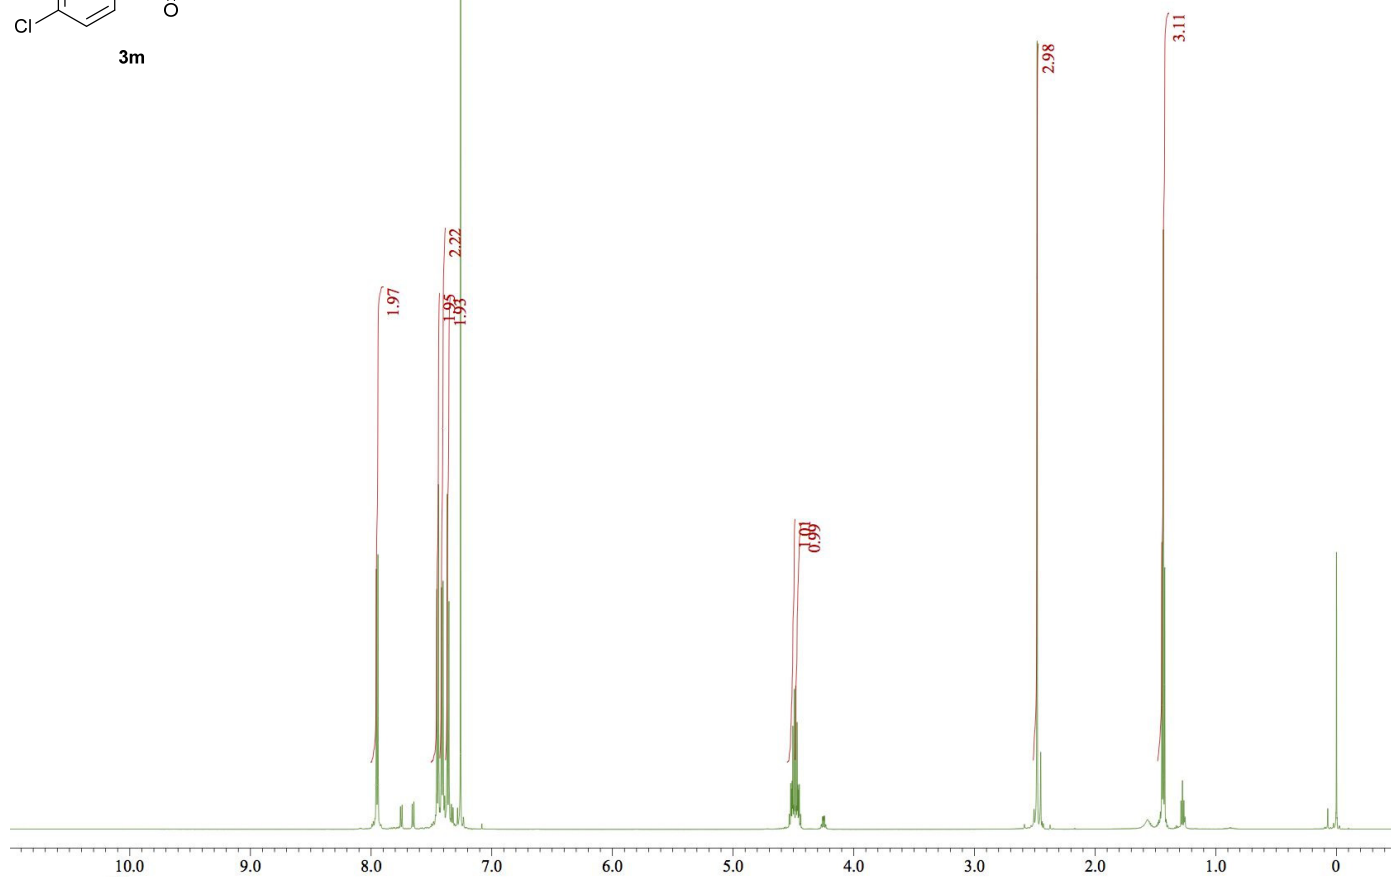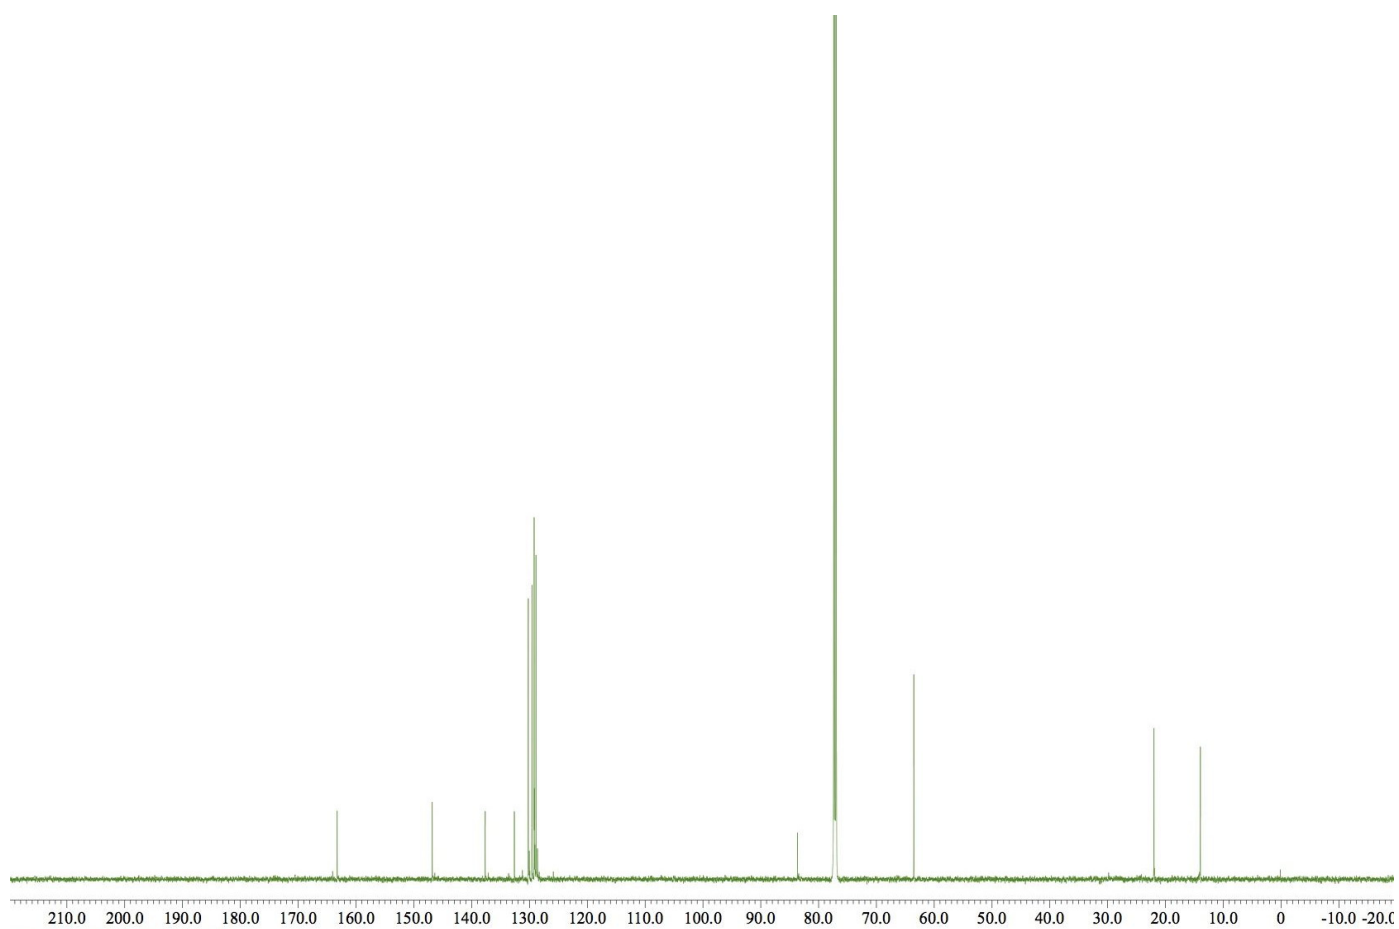

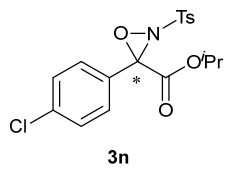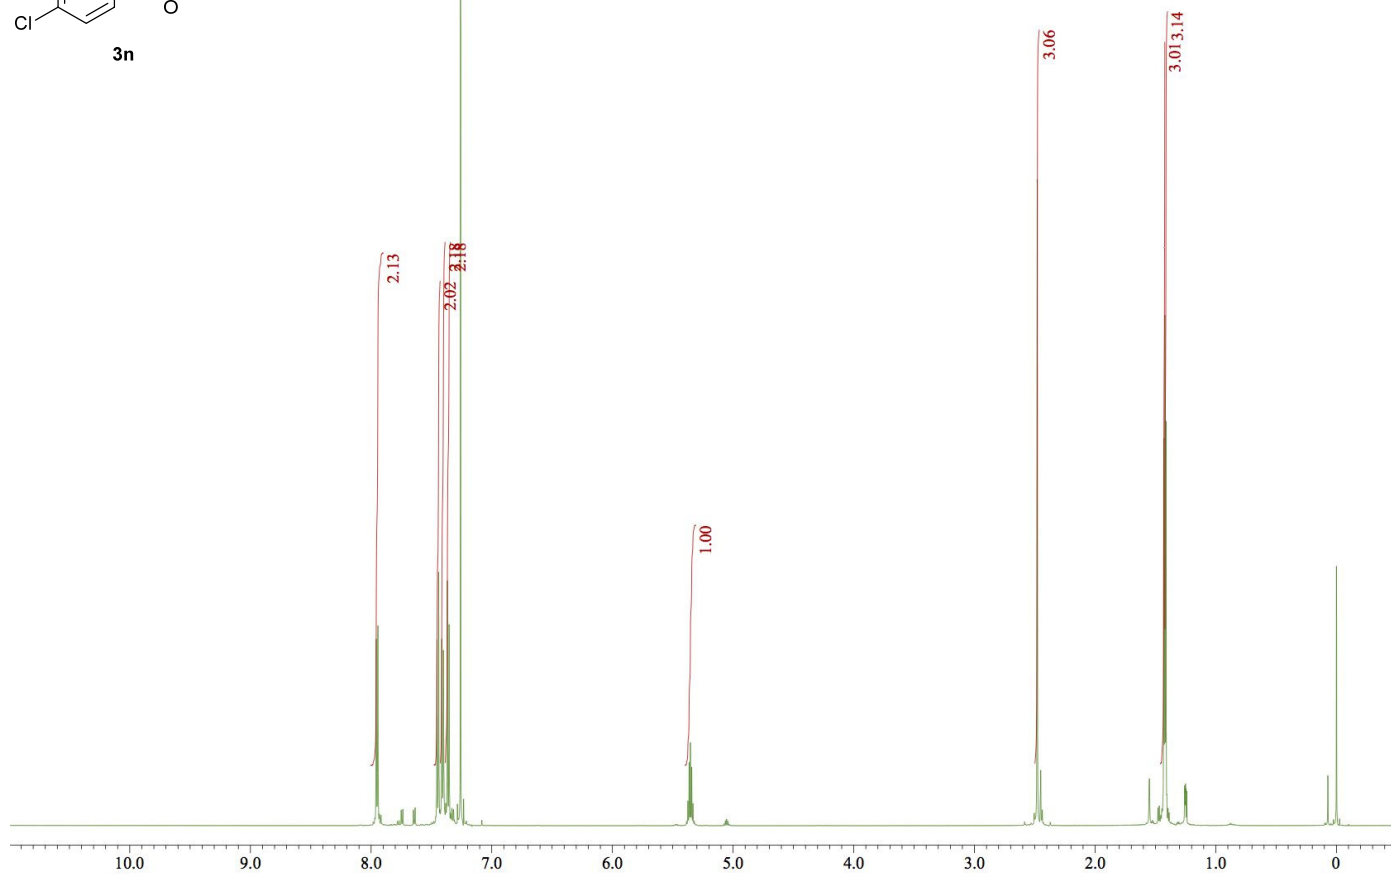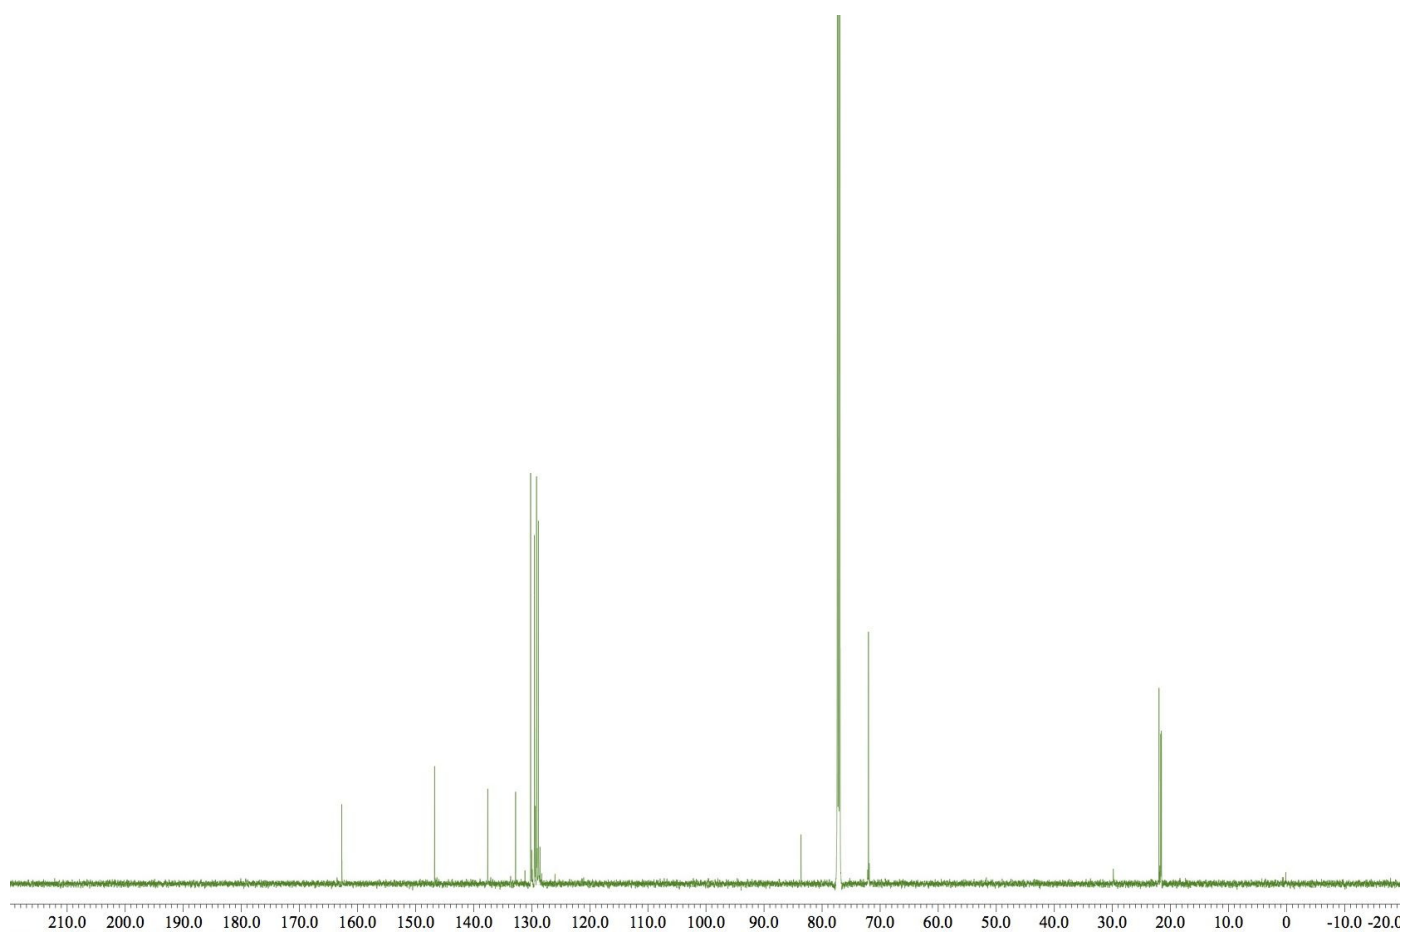

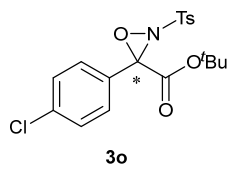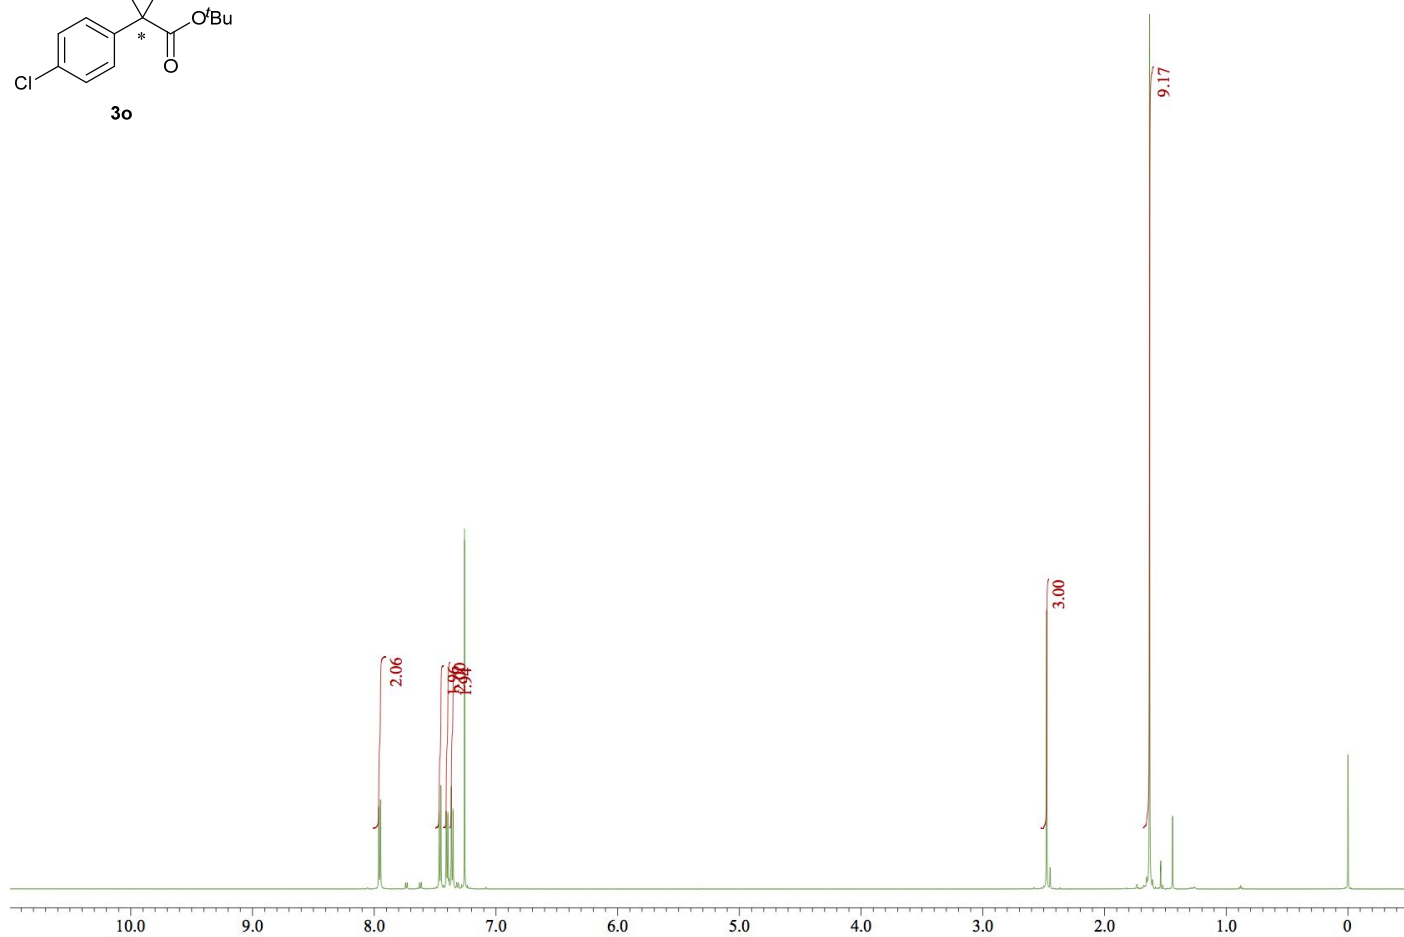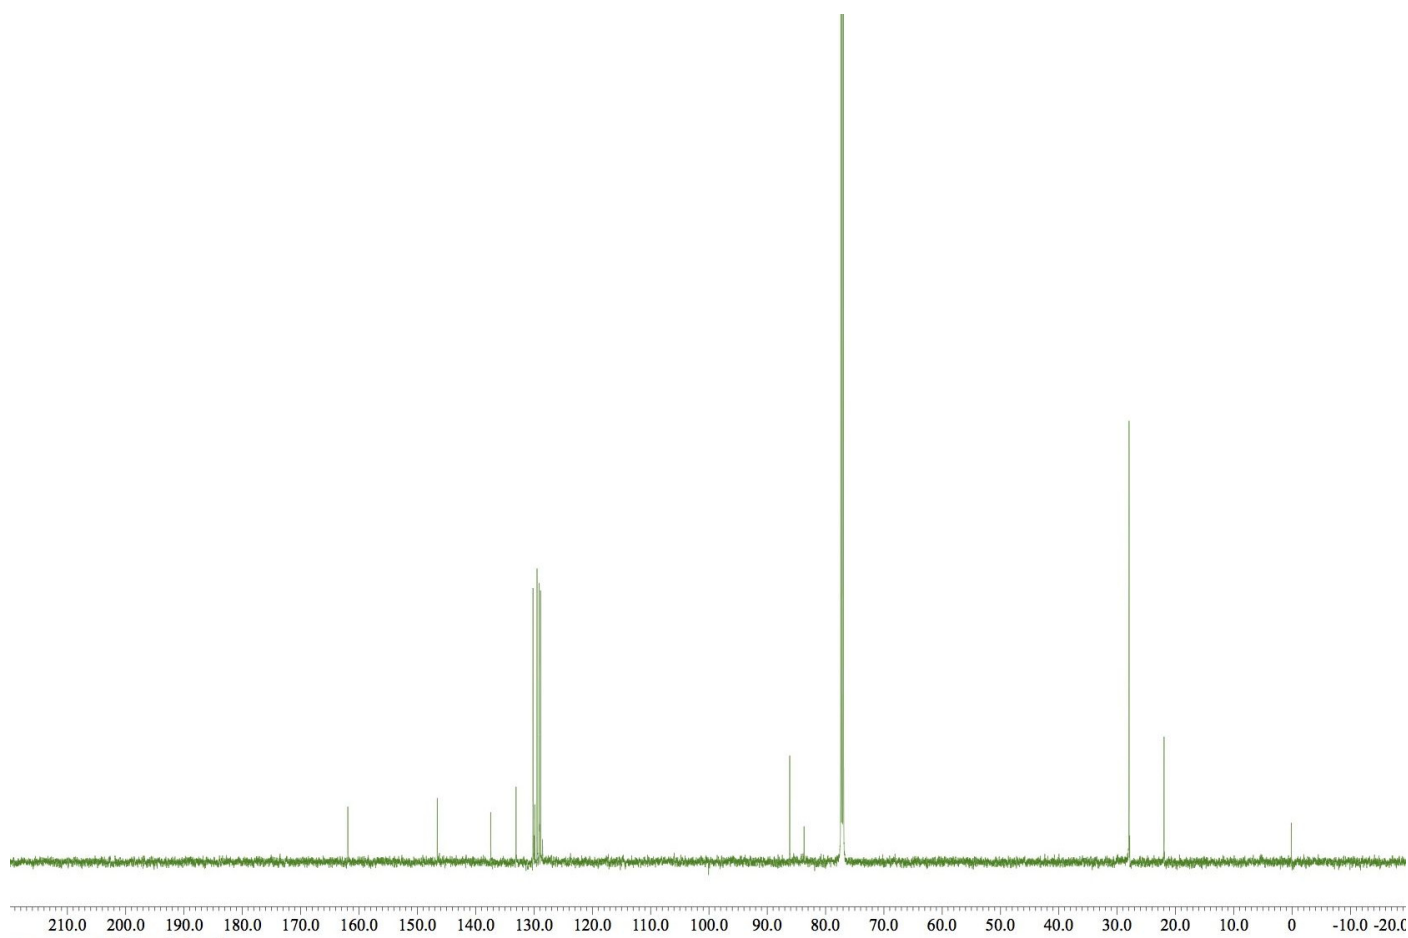

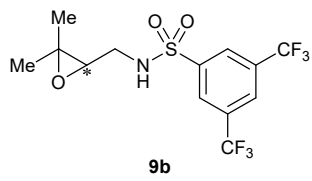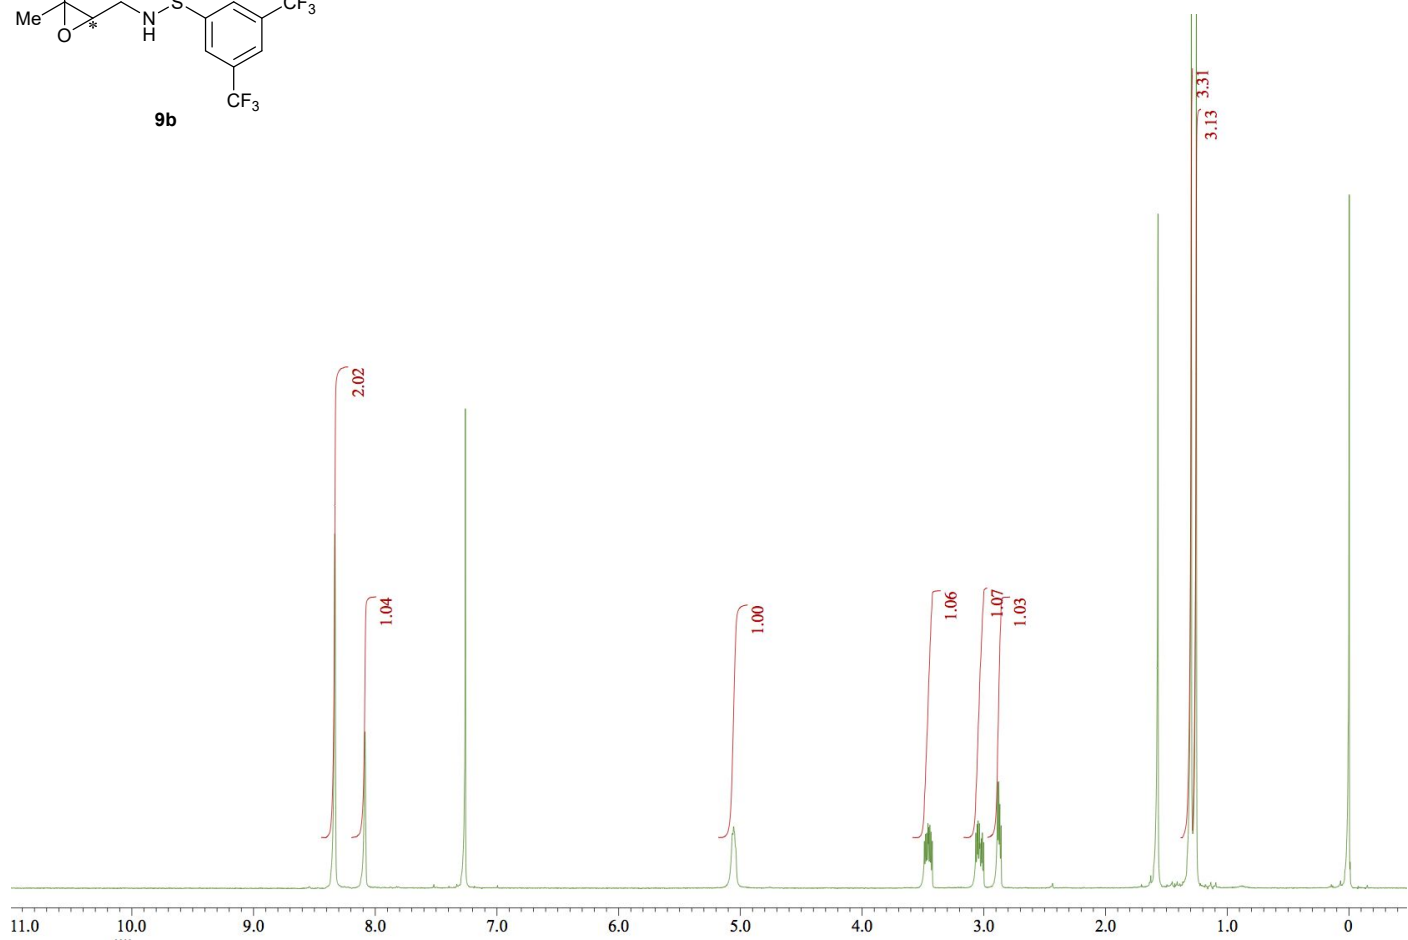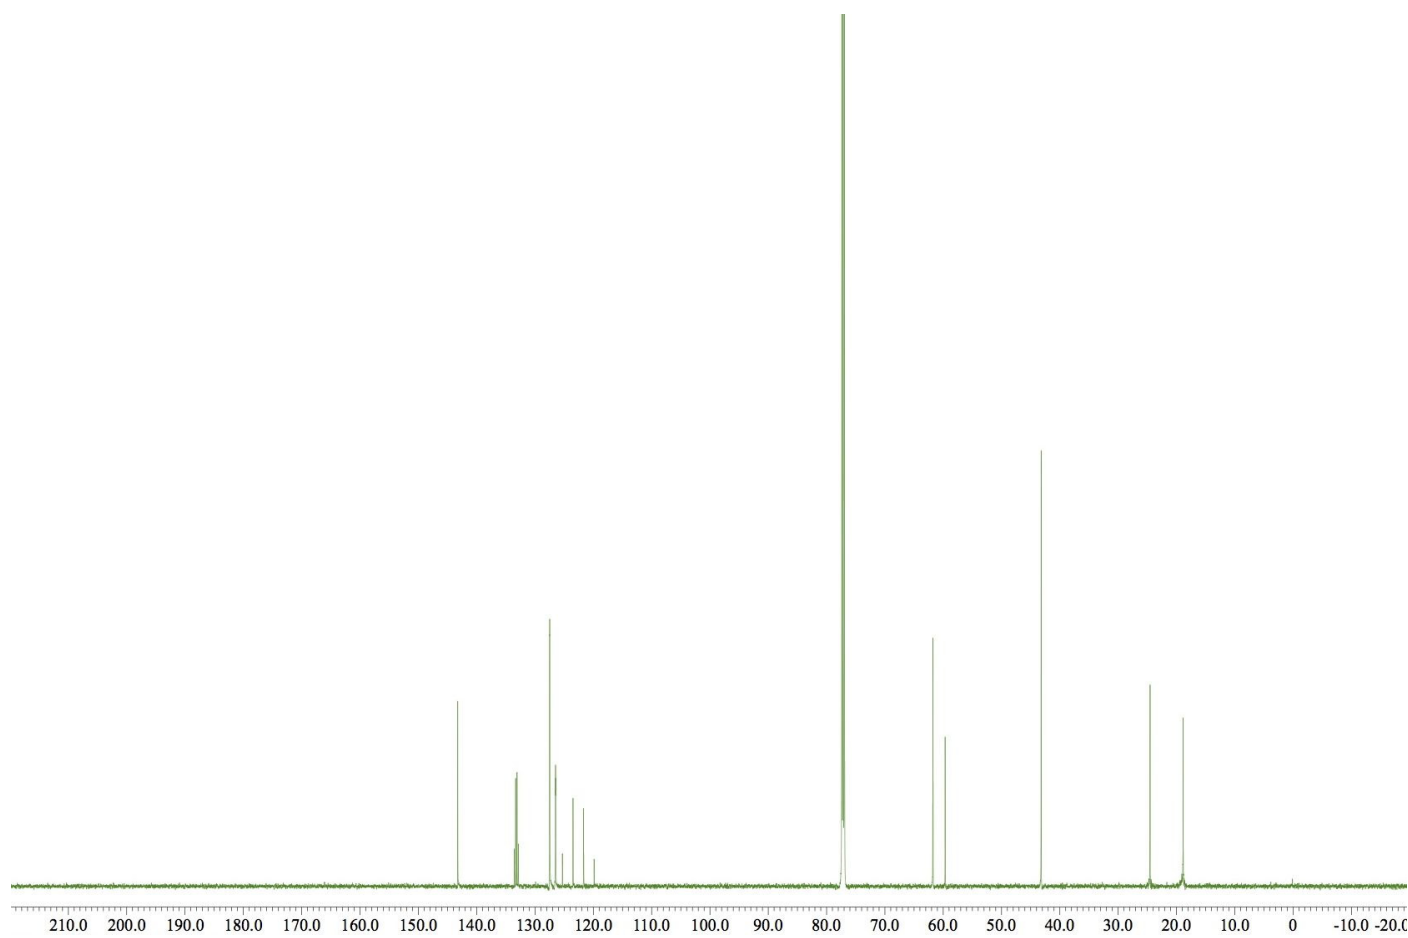

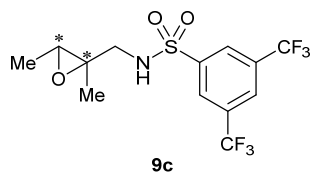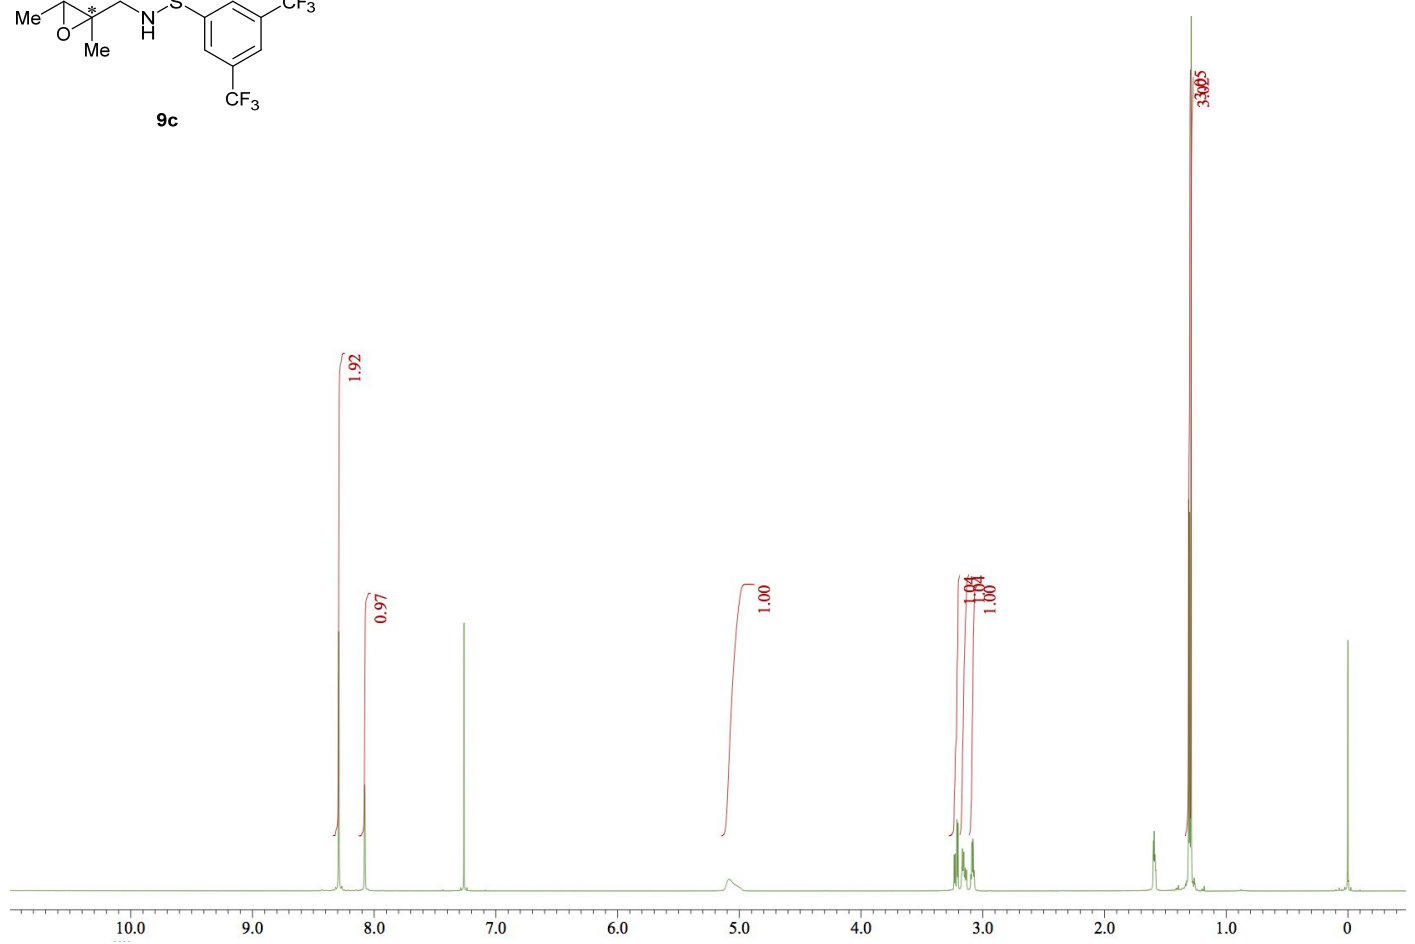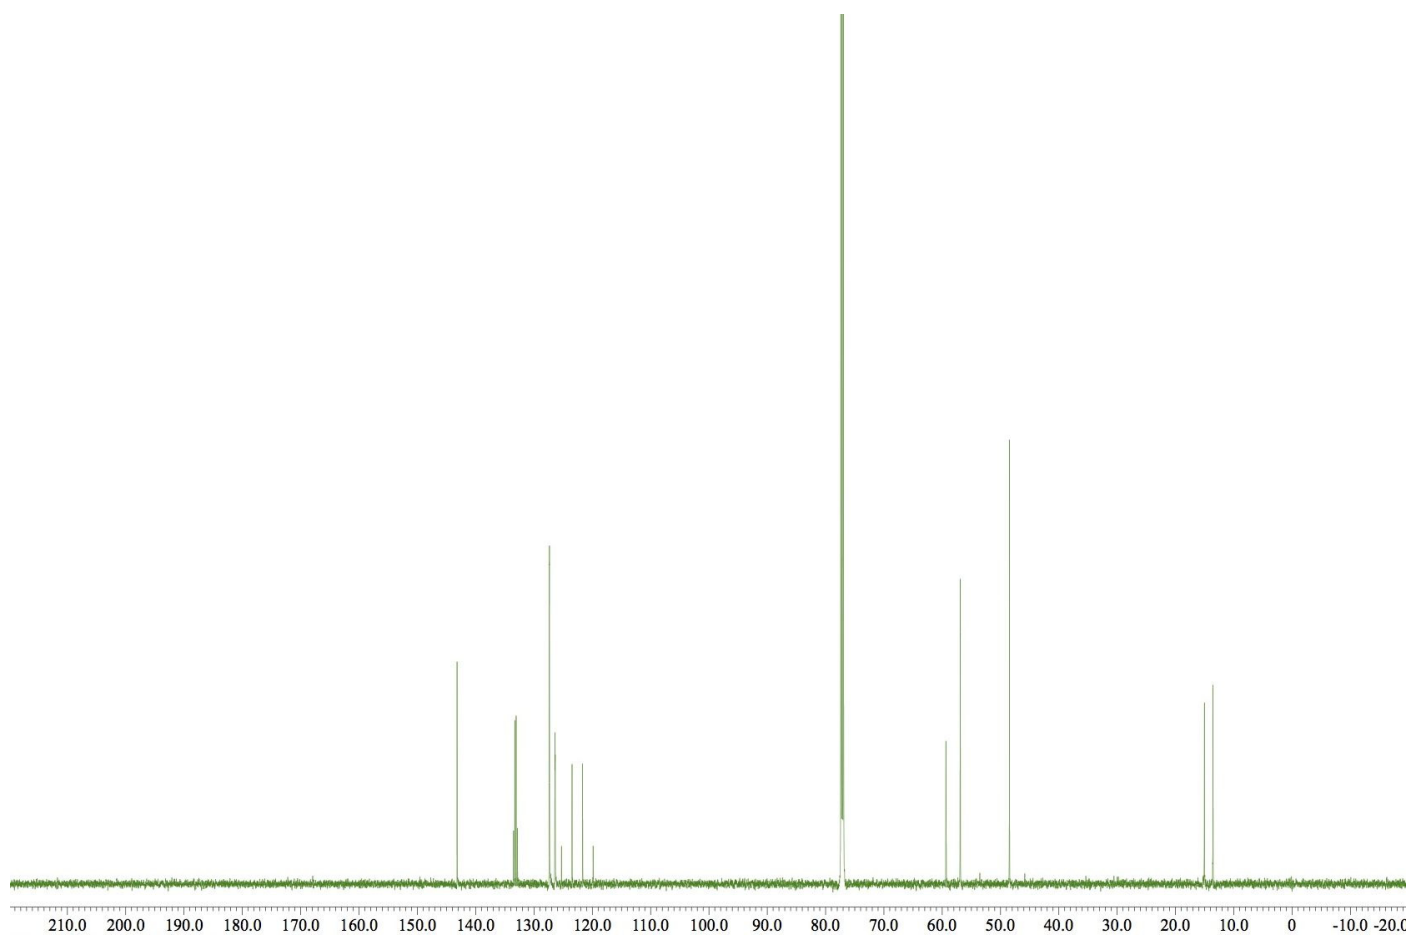

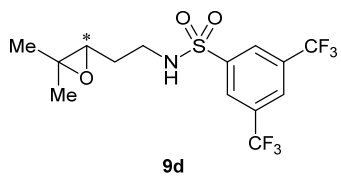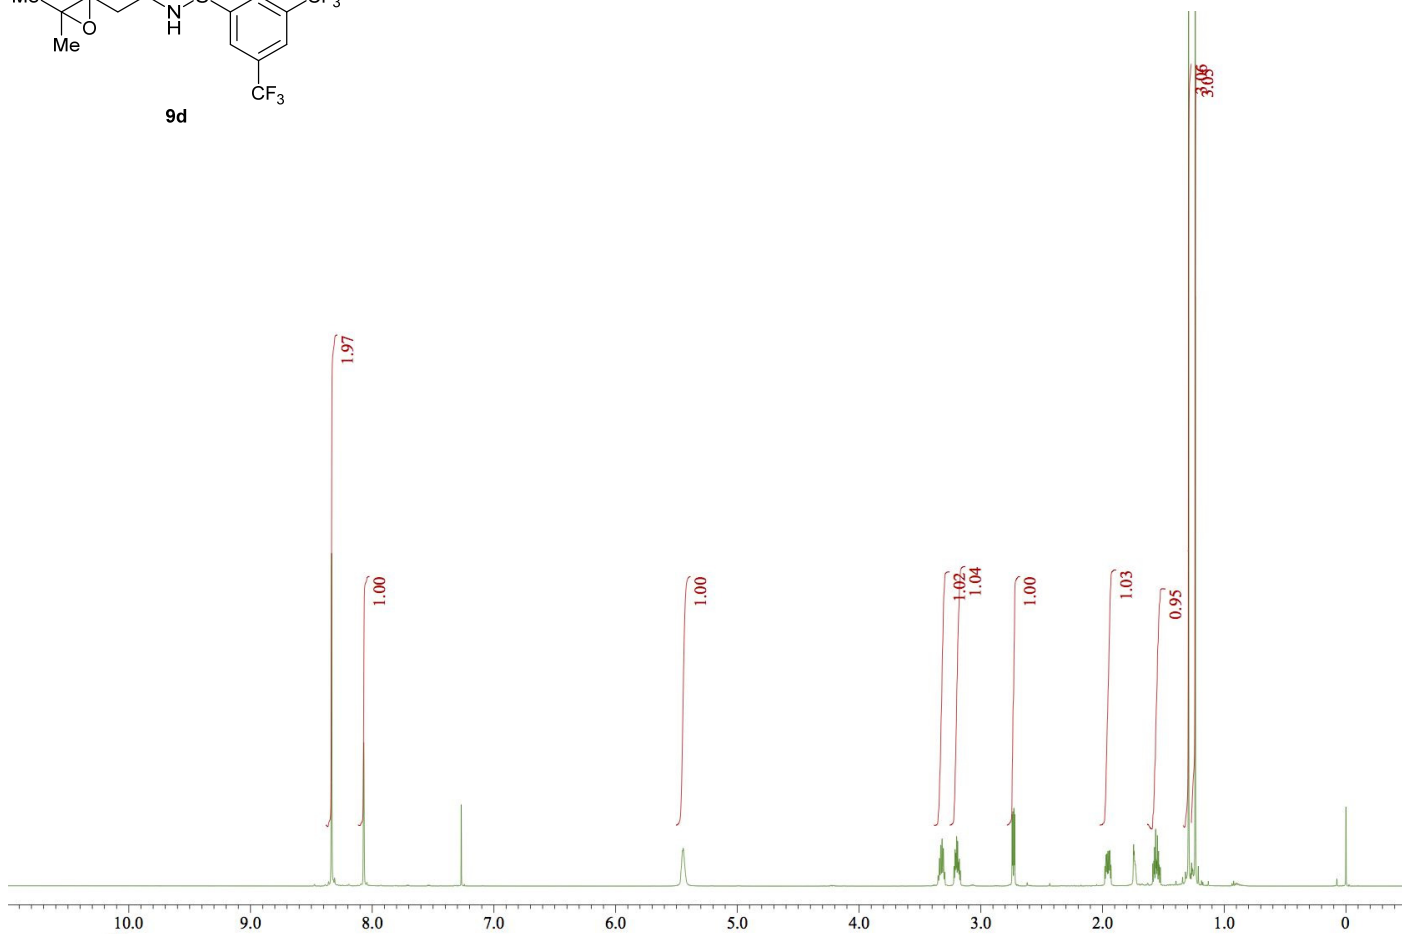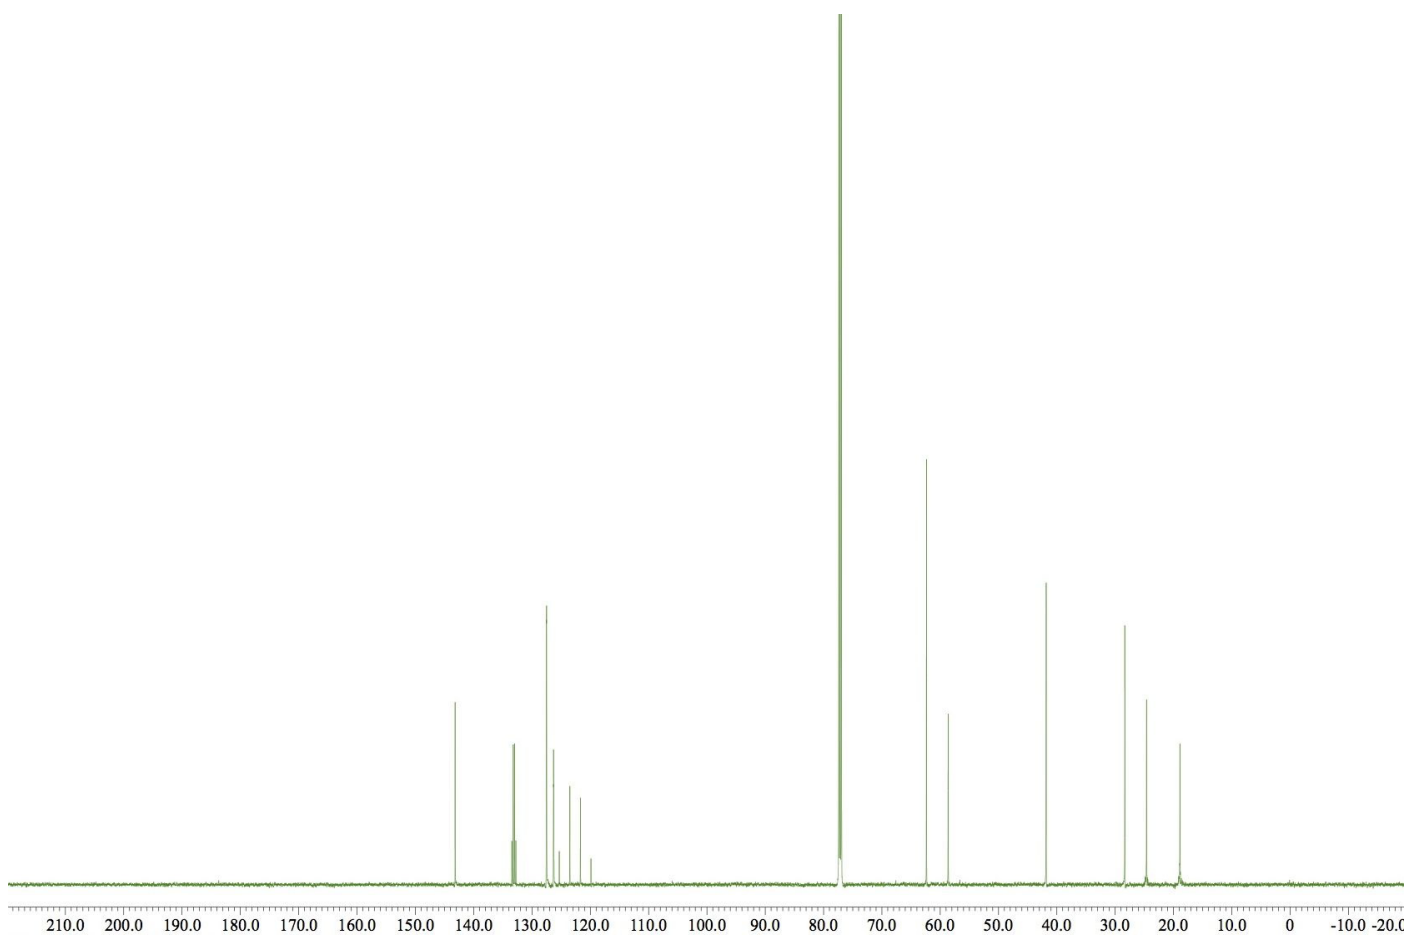

# HPLC traces

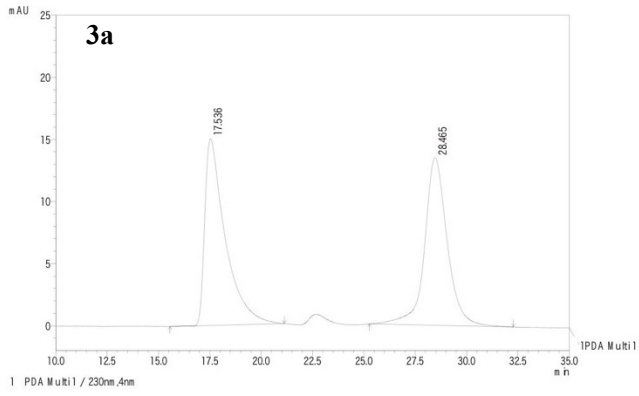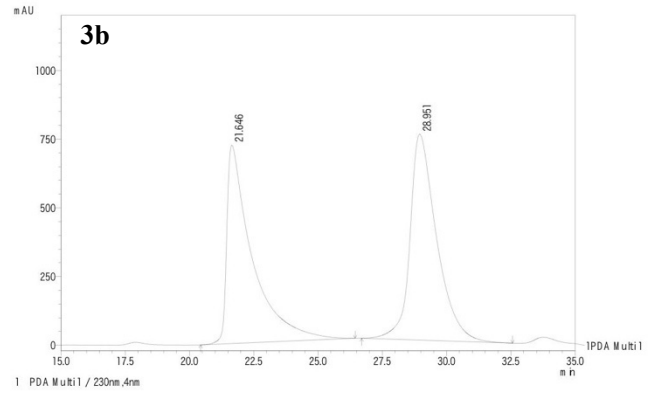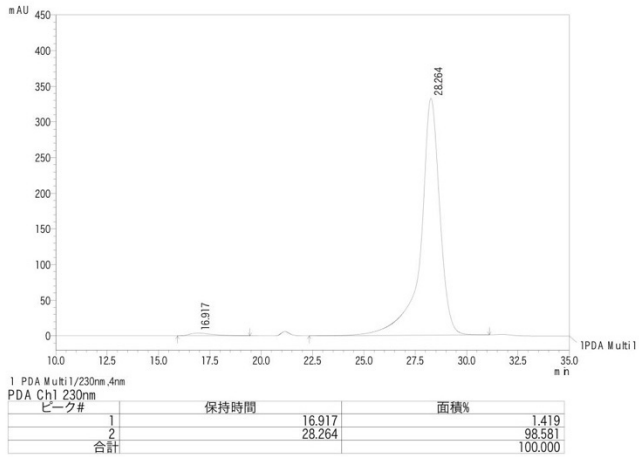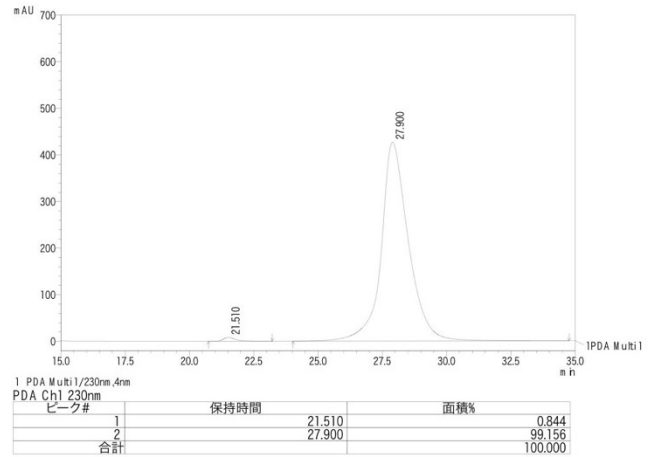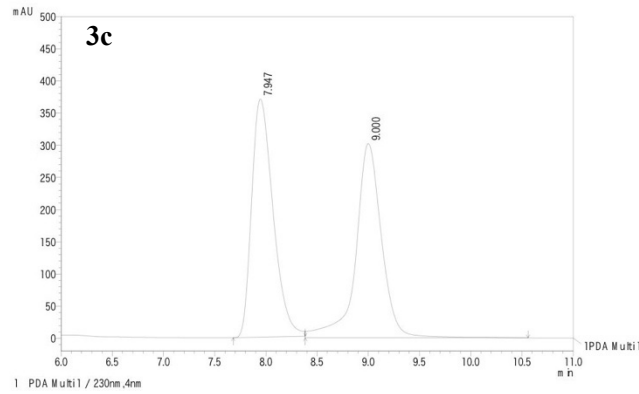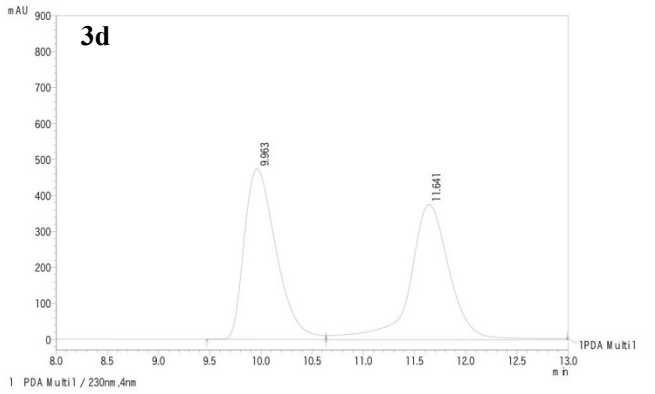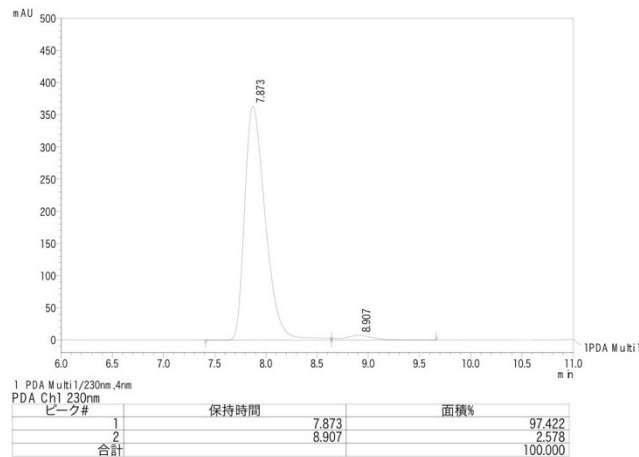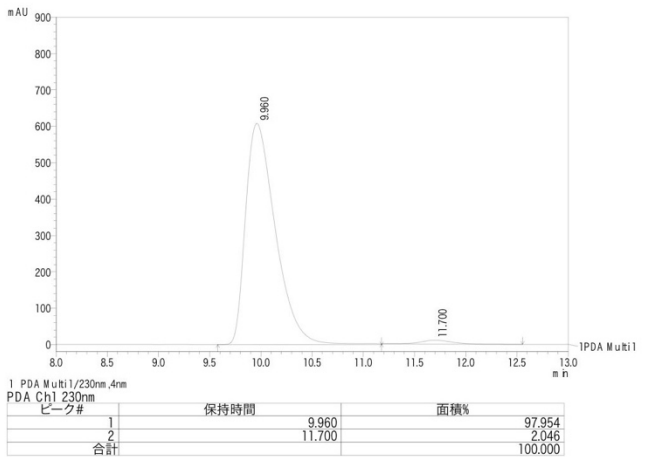



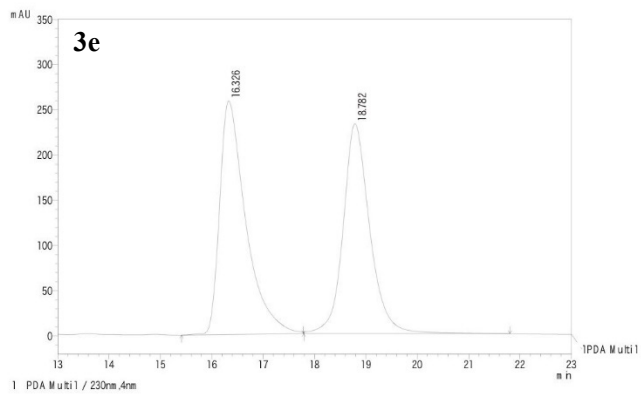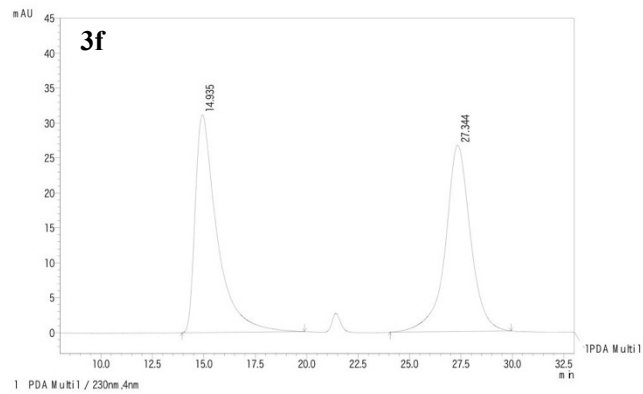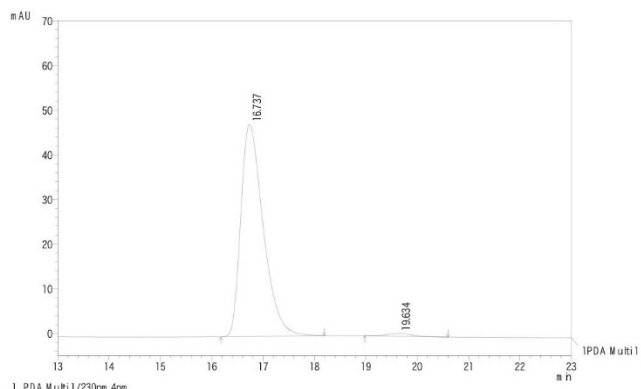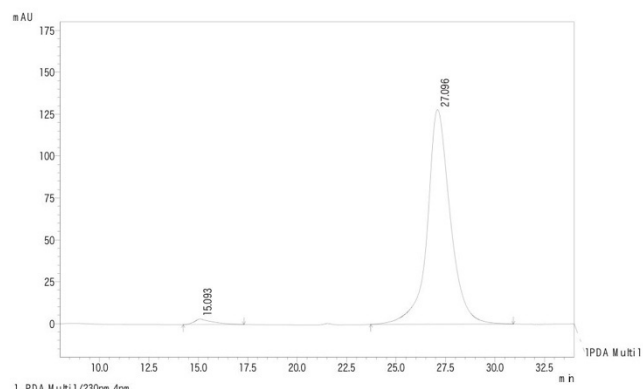

PDA Ch1 230nm

| ピーク# | 保持時間   | 面積%     |
|------|--------|---------|
| 1    | 16.737 | 98.632  |
| 2    | 19.634 | 1.368   |
| 合計   |        | 100.000 |

PDA Ch1 230nm

| ピーク# | 保持時間   | 面積%     |
|------|--------|---------|
| 1    | 15.093 | 1.996   |
| 2    | 27.096 | 98.004  |
| 合計   |        | 100.000 |

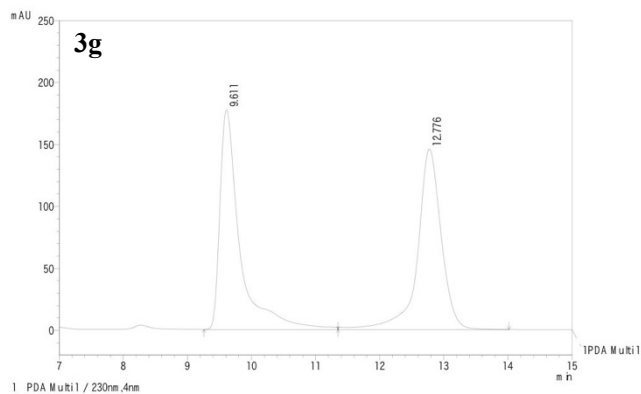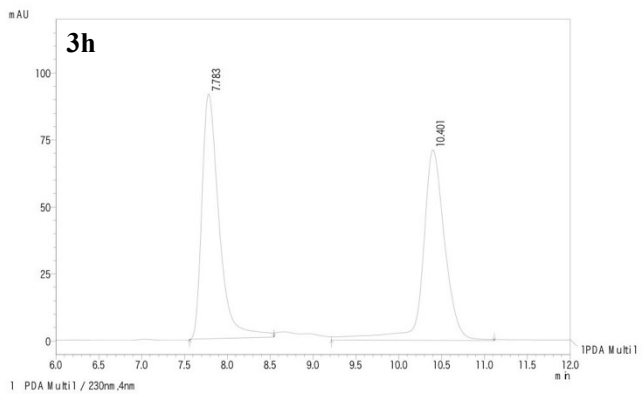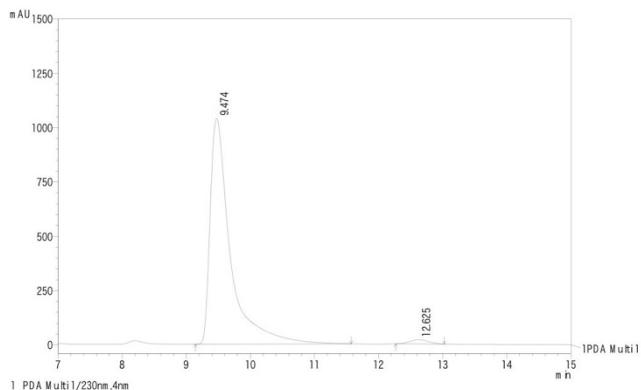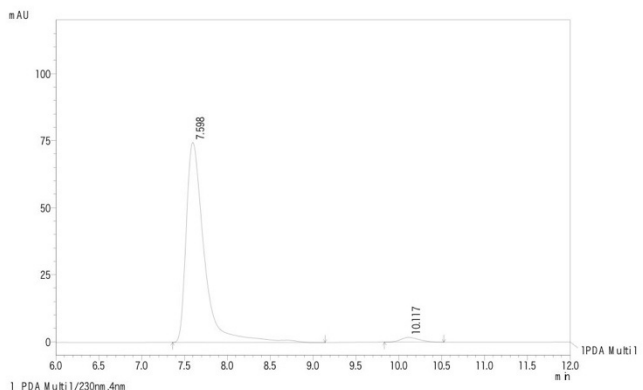

PDA Ch1 230nm

| ピーク# | 保持時間   | 面積%     |
|------|--------|---------|
| 1    | 9.474  | 98.315  |
| 2    | 12.625 | 1.685   |
| 合計   |        | 100.000 |

PDA Ch1 230nm

| ピーク# | 保持時間   | 面積%     |
|------|--------|---------|
| 1    | 7.598  | 97.637  |
| 2    | 10.117 | 2.363   |
| 合計   |        | 100.000 |

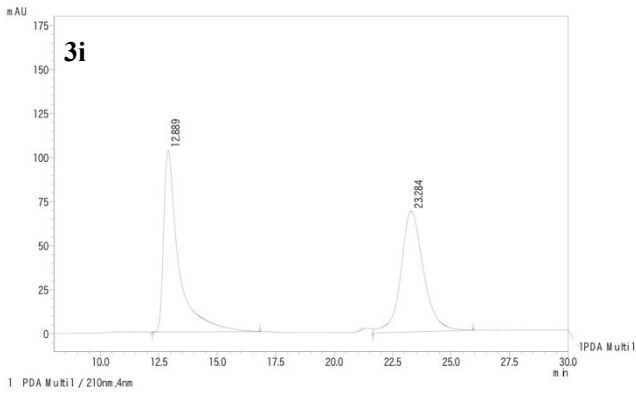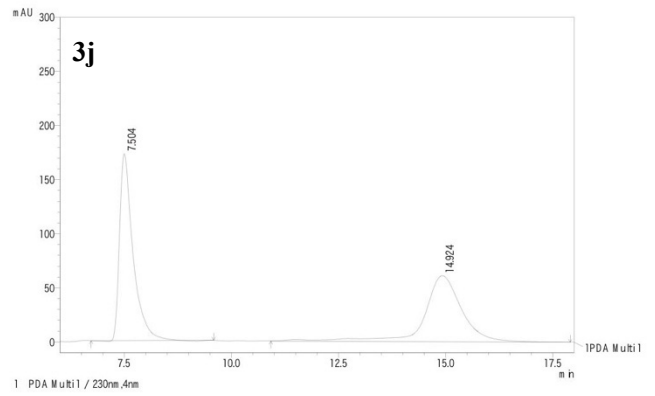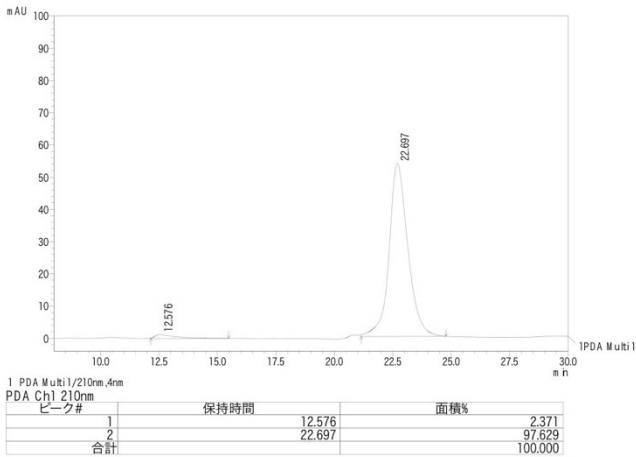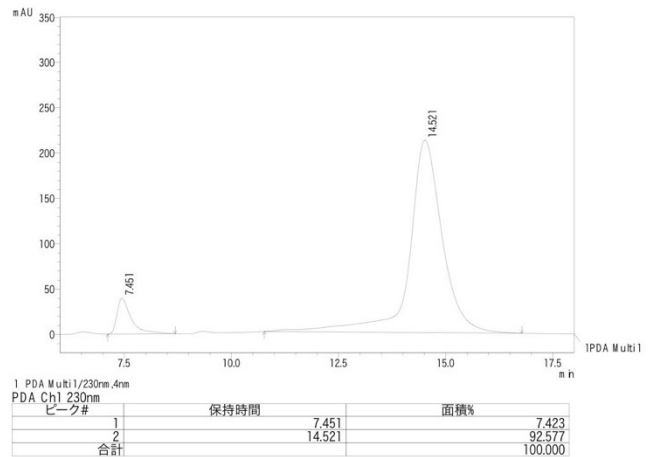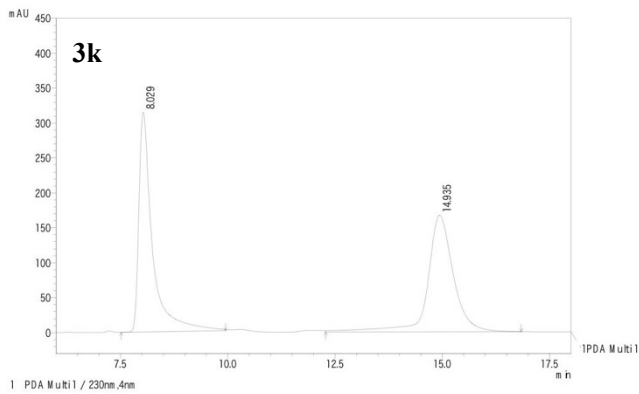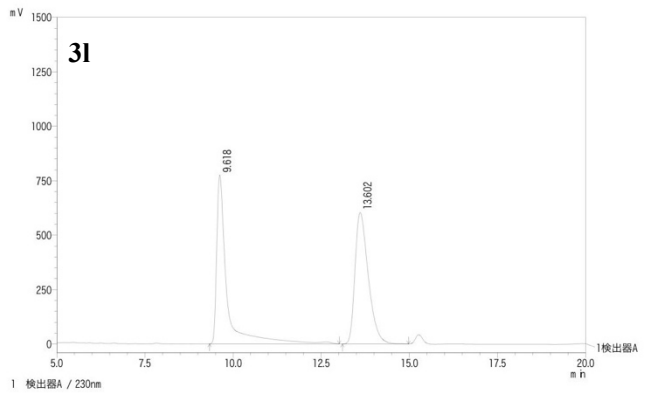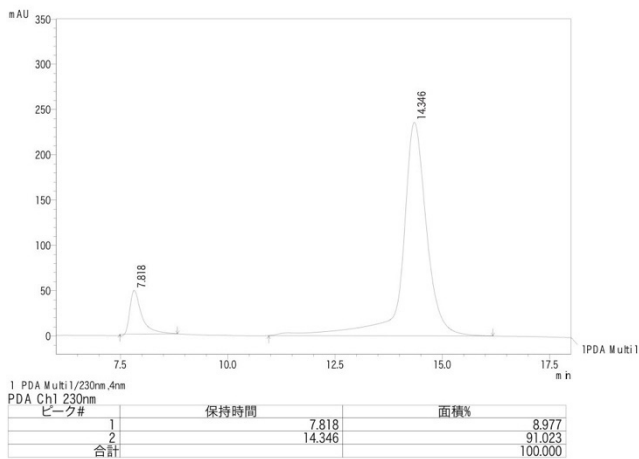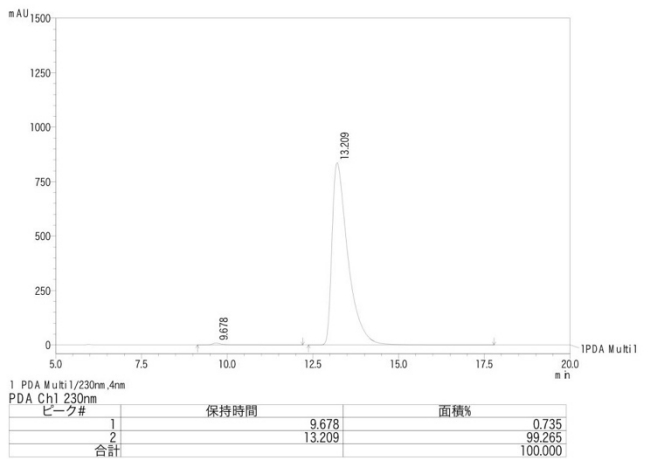

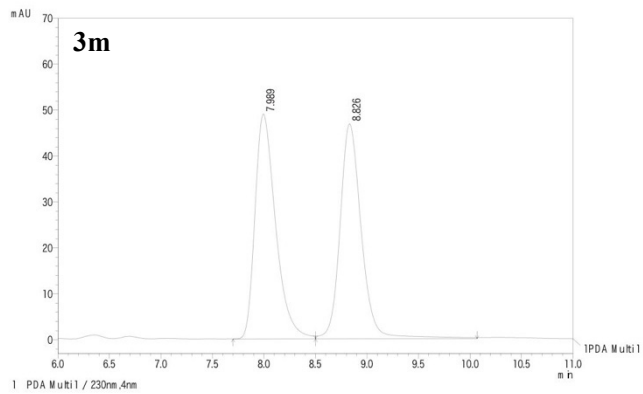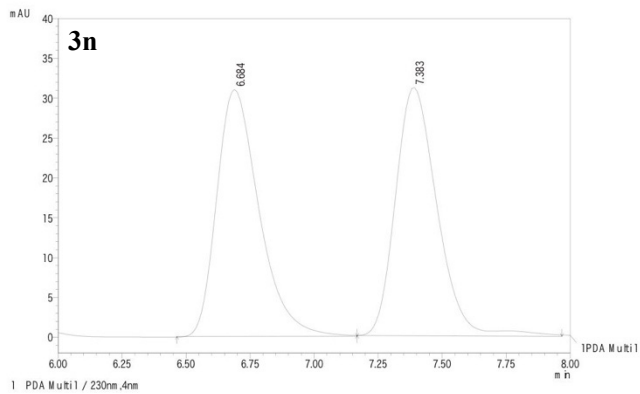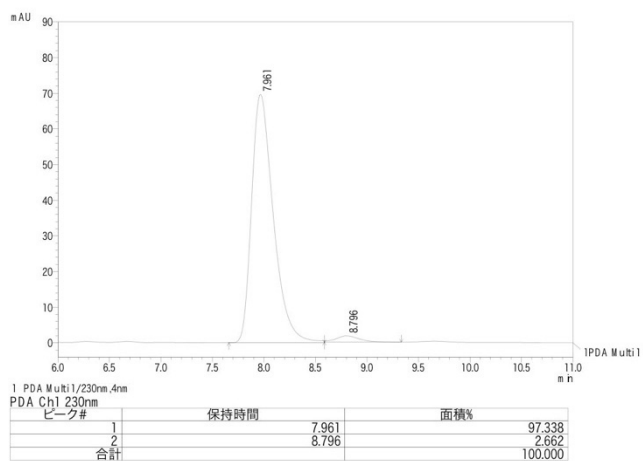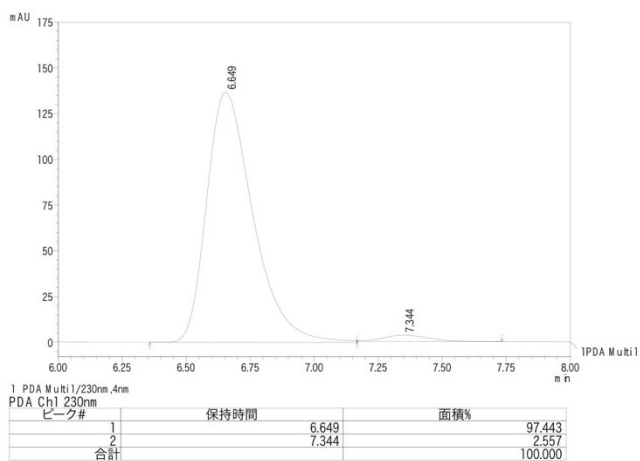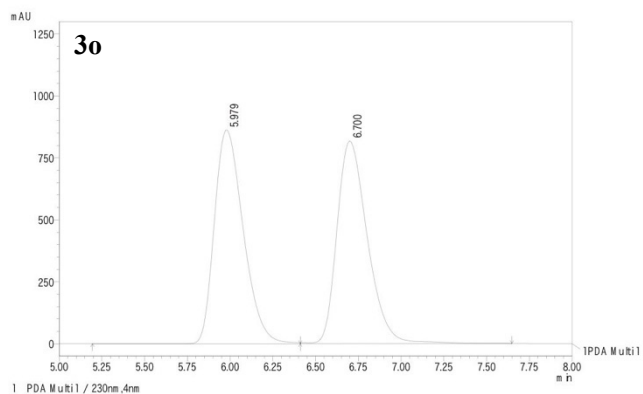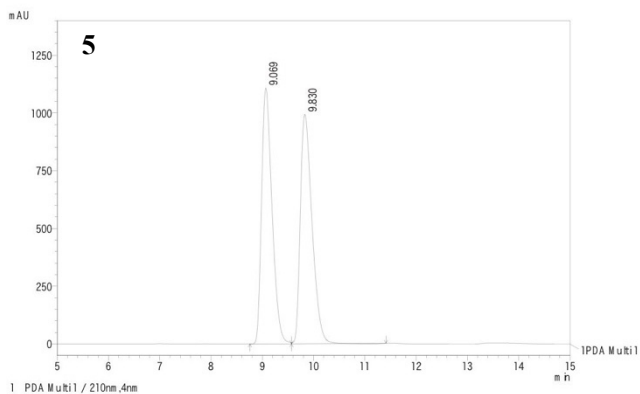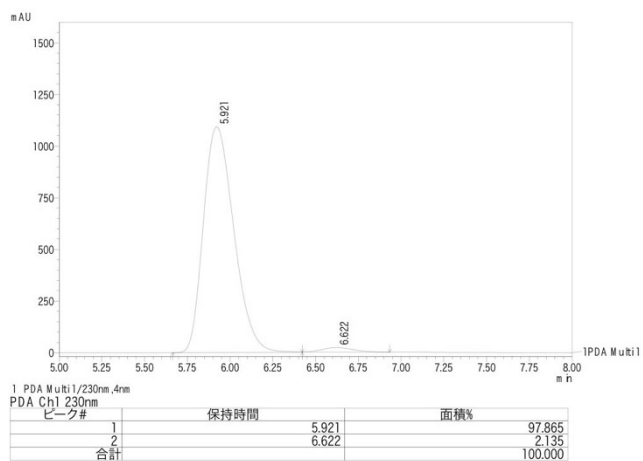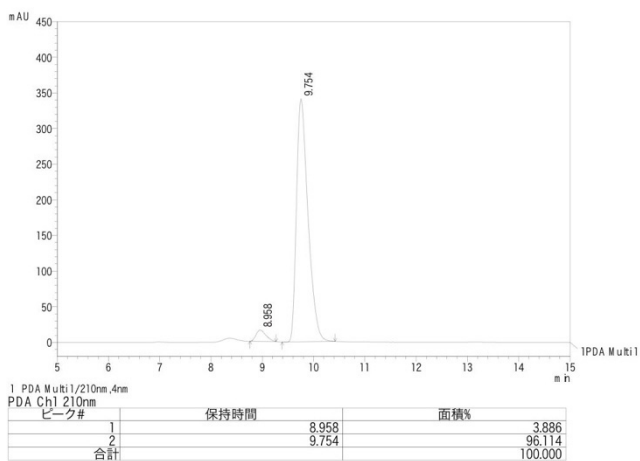

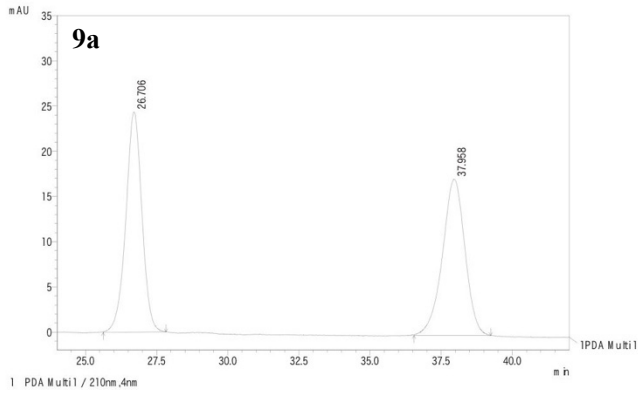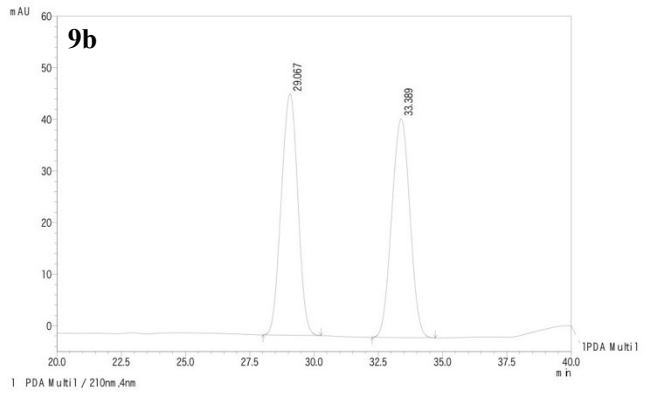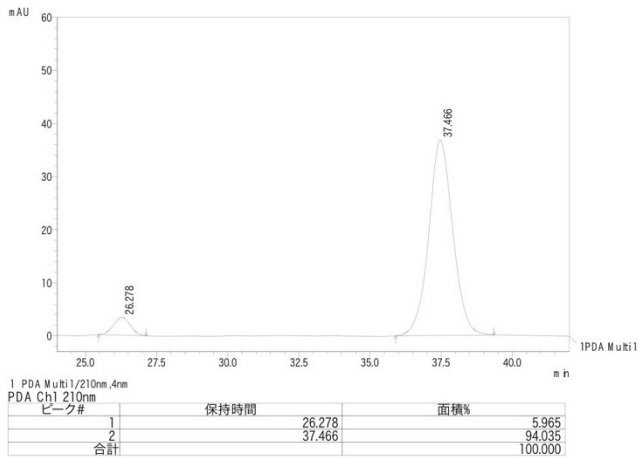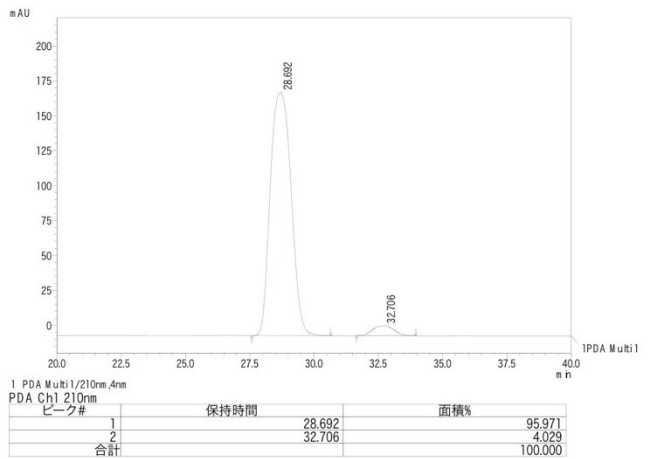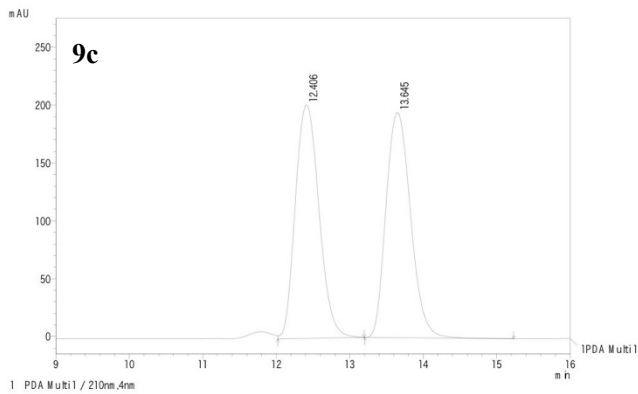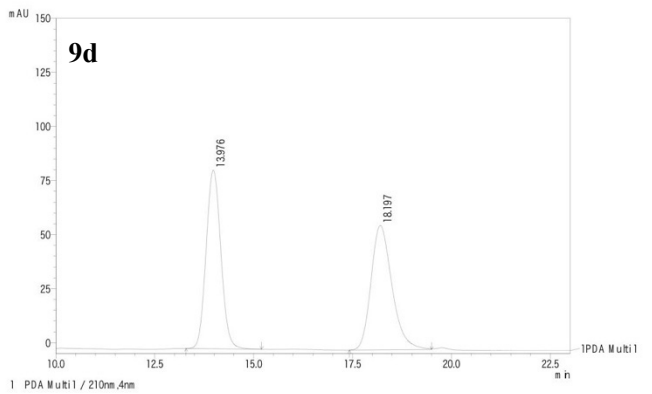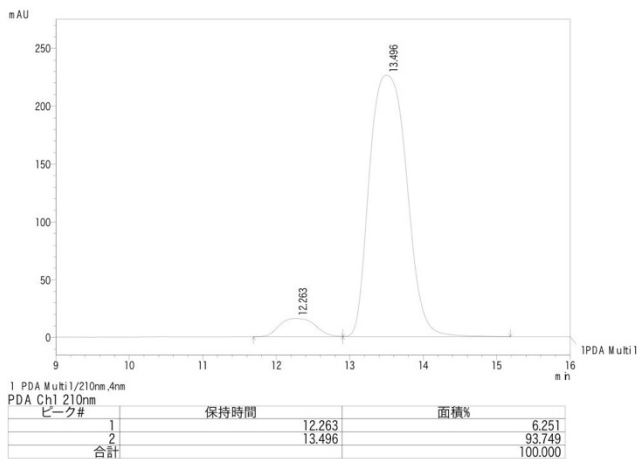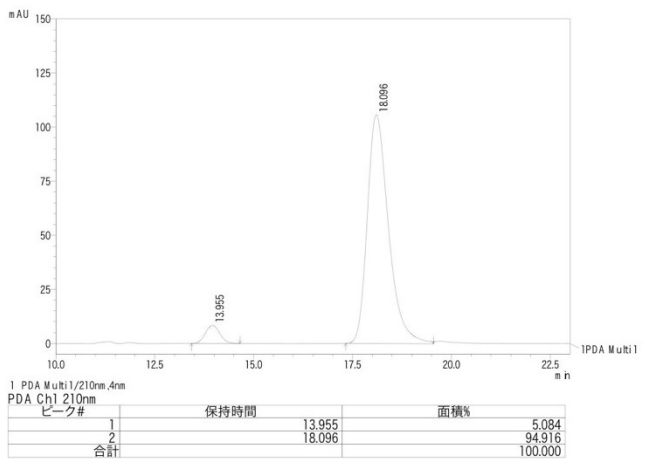

Supplement: c7cc02502e1.pdf [file c7cc02502e1.pdf]
